# Supplementary material for: Development and validation of influenza forecasting for 64 temperate and tropical countries
Source: PubMed Central journal article supplement (PMC6411231; doi:10.1371/journal.pcbi.1006742), 2019-02-27

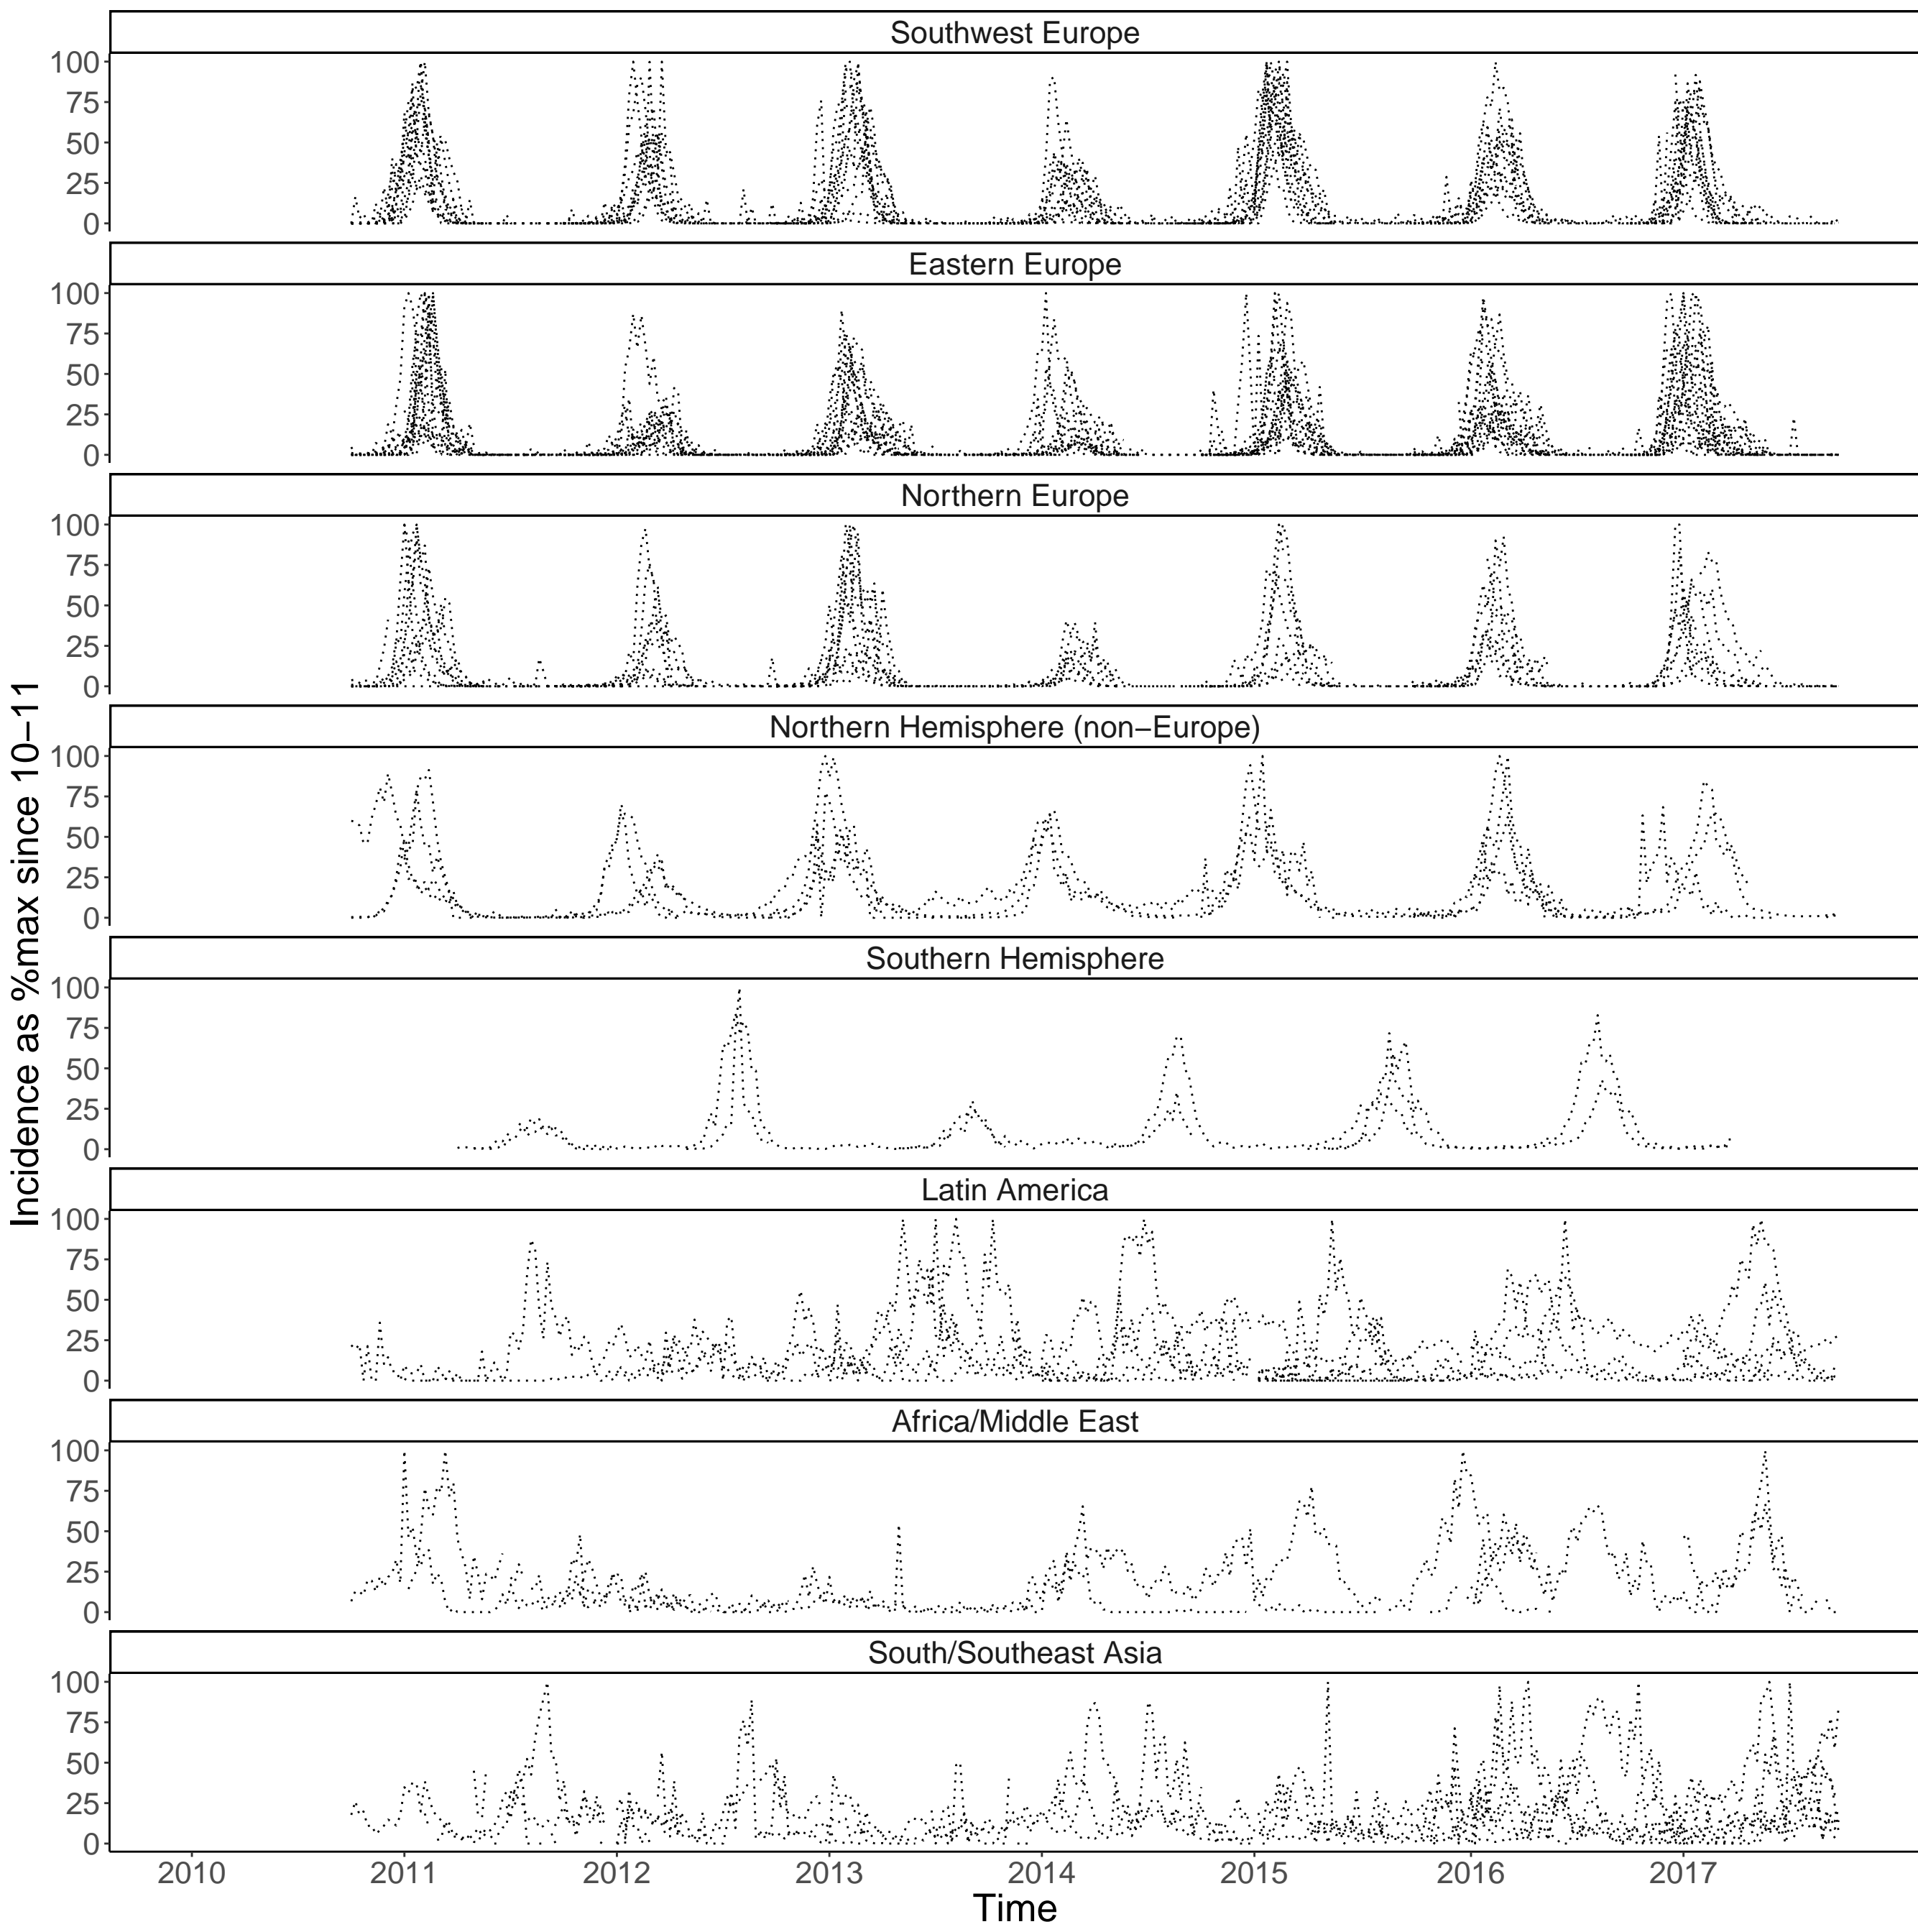

Supplement: pcbi.1006742.s004.pdf [file pcbi.1006742.s004.pdf]
