# Supplementary material for: Development and validation of influenza forecasting for 64 temperate and tropical countries
Source: PubMed Central journal article supplement (PMC6411231; doi:10.1371/journal.pcbi.1006742), 2019-02-27
Supplement: pcbi.1006742.s023.pdf [file pcbi.1006742.s023.pdf]

**Table S1: Countries used for retrospective forecasting, by region, data type, and scaling.**

| Country                  | Hemisphere | Region                           | Data Type | Scaling  |
|--------------------------|------------|----------------------------------|-----------|----------|
| Austria                  | North      | Southwest Europe                 | ILI       | 14       |
| Belgium                  | North      | Southwest Europe                 | ILI       | 8.5      |
| Croatia                  | North      | Southwest Europe                 | ILI       | 1.4      |
| France                   | North      | Southwest Europe                 | ARI/ILI   | 1.3/0.03 |
| Germany                  | North      | Southwest Europe                 | ARI       | 0.25     |
| Greece                   | North      | Southwest Europe                 | ILI       | 4        |
| Italy                    | North      | Southwest Europe                 | ILI       | 1        |
| Luxembourg               | North      | Southwest Europe                 | ARI       | 32       |
| Netherlands              | North      | Southwest Europe                 | ILI       | 31       |
| Portugal                 | North      | Southwest Europe                 | ILI       | 245      |
| Serbia                   | North      | Southwest Europe                 | ILI       | 0.5      |
| Slovenia                 | North      | Southwest Europe                 | ARI       | 5.8      |
| Spain                    | North      | Southwest Europe                 | ILI       | 2        |
| Belarus                  | North      | Eastern Europe                   | ARI       | 0.2      |
| Bulgaria                 | North      | Eastern Europe                   | ARI       | 1.25     |
| Czechia                  | North      | Eastern Europe                   | ILI       | 0.8      |
| Georgia                  | North      | Eastern Europe                   | ILI       | 15       |
| Hungary                  | North      | Eastern Europe                   | ILI       | 1        |
| Israel                   | North      | Eastern Europe                   | ILI       | 3.5      |
| Kazakhstan               | North      | Eastern Europe                   | ARI       | 0.35     |
| Kyrgyzstan               | North      | Eastern Europe                   | ARI       | 0.63     |
| Poland                   | North      | Eastern Europe                   | ILI       | 1.3      |
| Republic of Moldova      | North      | Eastern Europe                   | ARI       | 2.25     |
| Romania                  | North      | Eastern Europe                   | ILI       | 39       |
| Russian Federation       | North      | Eastern Europe                   | ARI       | 0.02     |
| Slovakia                 | North      | Eastern Europe                   | ILI       | 0.57     |
| Turkey                   | North      | Eastern Europe                   | ILI       | 3.5      |
| Ukraine                  | North      | Eastern Europe                   | ARI       | 0.03     |
| Uzbekistan               | North      | Eastern Europe                   | ARI       | 68       |
| Denmark                  | North      | Northern Europe                  | ILI       | 18       |
| Estonia                  | North      | Northern Europe                  | ARI       | 1.5      |
| Finland                  | North      | Northern Europe                  | ILI       | 14       |
| Iceland                  | North      | Northern Europe                  | ILI       | 57       |
| Ireland                  | North      | Northern Europe                  | ILI       | 45       |
| Latvia                   | North      | Northern Europe                  | ARI       | 4.4      |
| Lithuania                | North      | Northern Europe                  | ILI       | 1.3      |
| Norway                   | North      | Northern Europe                  | ILI       | 1.65     |
| Sweden                   | North      | Northern Europe                  | ILI       | 132      |
| United Kingdom           | North      | Northern Europe                  | ARI       | 1.8      |
| Canada                   | North      | Northern Hemisphere (non-Europe) | ILI Rate  | 182      |
| Mexico                   | North      | Northern Hemisphere (non-Europe) | ARI       | 0.004    |
| Morocco                  | North      | Northern Hemisphere (non-Europe) | ILI       | 0.78     |
| United States of America | North      | Northern Hemisphere (non-Europe) | ILI       | 0.27     |

|             |         |                      |           |       |
|-------------|---------|----------------------|-----------|-------|
| Australia   | South   | Southern Hemisphere  | ILI       | 32    |
| Chile       | South   | Southern Hemisphere  | ILI       | 31    |
| New Zealand | South   | Southern Hemisphere  | ILI       | 16    |
| Brazil      | Tropics | Latin America        | SARI      | 6     |
| Bolivia     | Tropics | Latin America        | ARI       | 0.03  |
| Colombia    | Tropics | Latin America        | ARI       | 0.075 |
| Cuba        | Tropics | Latin America        | ILI       | 127   |
| Ecuador     | Tropics | Latin America        | SARI      | 48    |
| Honduras    | Tropics | Latin America        | Pneumonia | 2     |
| Paraguay    | Tropics | Latin America        | ILI       | 3.5   |
| Peru        | Tropics | Latin America        | SARI      | 374   |
| Kenya       | Tropics | Africa/Middle East   | ILI       | 10    |
| Madagascar  | Tropics | Africa/Middle East   | ILI       | 6.6   |
| Oman        | Tropics | Africa/Middle East   | SARI      | 6.4   |
| Pakistan    | Tropics | Africa/Middle East   | ILI       | 93    |
| Bangladesh  | Tropics | South/Southeast Asia | SARI      | 48    |
| Bhutan      | Tropics | South/Southeast Asia | ILI       | 12    |
| Cambodia    | Tropics | South/Southeast Asia | SARI      | 90    |
| Indonesia   | Tropics | South/Southeast Asia | ILI       | 26    |
| Singapore   | Tropics | South/Southeast Asia | ILI       | 4.7   |
| Thailand    | Tropics | South/Southeast Asia | ILI       | 0.04  |
