# Supplementary material for: Development and validation of influenza forecasting for 64 temperate and tropical countries
Source: PubMed Central journal article supplement (PMC6411231; doi:10.1371/journal.pcbi.1006742), 2019-02-27
Supplement: pcbi.1006742.s024.pdf [file pcbi.1006742.s024.pdf]

**Table S2: Countries and seasons used for retrospective forecasting.**

| Country                  | 2009 pdm | 10-11 | 11-12 | 12-13 | 13-14 | 14-15 | 15-16 | 16-17 |
|--------------------------|----------|-------|-------|-------|-------|-------|-------|-------|
| Austria                  |          | X     | X     | X     | X     | X     | X     | X     |
| Belgium                  | X        | X     | X     | X     | X     | X     | X     | X     |
| Croatia                  | X        | X     | X     | X     | X     | X     | X     | X     |
| France                   |          |       |       | X     | X     | X     | X     | X     |
| Germany                  | X        | X     | X     | X     | X     | X     | X     | X     |
| Greece                   | X        | X     | X     | X     | X     | X     |       | X     |
| Italy                    |          | X     | X     | X     | X     | X     | X     | X     |
| Luxembourg               | X        | X     | X     | X     | X     | X     | X     | X     |
| Netherlands              | X        | X     | X     | X     | X     | X     | X     | X     |
| Portugal                 |          | X     | X     | X     | X     | X     | X     | X     |
| Serbia                   | X        | X     |       | X     | X     | X     | X     |       |
| Slovenia                 | X        | X     | X     | X     | X     | X     | X     | X     |
| Spain                    | X        | X     | X     | X     | X     | X     | X     | X     |
| Belarus                  |          | X     | X     | X     | X     | X     | X     | X     |
| Bulgaria                 | X        | X     | X     | X     | X     | X     | X     | X     |
| Czechia                  | X        | X     | X     | X     |       | X     | X     | X     |
| Georgia                  | X        | X     | X     | X     | X     | X     | X     | X     |
| Hungary                  | X        | X     | X     | X     | X     | X     | X     | X     |
| Israel                   | X        | X     | X     | X     | X     | X     | X     | X     |
| Kazakhstan               |          | X     | X     | X     | X     | X     | X     | X     |
| Kyrgyzstan               | X        | X     | X     | X     |       | X     | X     | X     |
| Poland                   | X        | X     |       | X     | X     | X     | X     | X     |
| Republic of Moldova      | X        | X     | X     | X     | X     | X     | X     | X     |
| Romania                  | X        | X     | X     | X     | X     | X     | X     | X     |
| Russian Federation       | X        | X     | X     | X     | X     | X     | X     | X     |
| Slovakia                 | X        | X     | X     | X     | X     | X     | X     | X     |
| Turkey                   | X        | X     | X     | X     | X     | X     | X     | X     |
| Ukraine                  | X        | X     | X     | X     | X     | X     | X     | X     |
| Uzbekistan               |          |       |       | X     | X     | X     | X     | X     |
| Denmark                  | X        | X     | X     | X     | X     | X     | X     | X     |
| Estonia                  | X        | X     | X     | X     | X     | X     | X     | X     |
| Finland                  |          |       |       | X     | X     | X     | X     | X     |
| Iceland                  |          | X     | X     | X     | X     | X     | X     | X     |
| Ireland                  | X        | X     | X     | X     | X     | X     | X     | X     |
| Latvia                   | X        | X     | X     | X     | X     | X     | X     | X     |
| Lithuania                |          | X     |       | X     |       | X     | X     | X     |
| Norway                   | X        | X     | X     | X     |       | X     | X     | X     |
| Sweden                   | X        | X     | X     | X     | X     |       |       |       |
| United Kingdom           | X        | X     | X     | X     | X     |       |       |       |
| Canada                   | X        | X     | X     | X     | X     |       | X     |       |
| Mexico                   |          |       | X     | X     | X     | X     | X     | X     |
| Morocco                  | X        | X     | X     | X     |       | X     | X     | X     |
| United States of America | X        | X     | X     | X     | X     | X     | X     | X     |
| Australia                |          |       | X     | X     | X     | X     | X     | X     |
| Chile                    |          |       |       |       |       |       | X     | X     |
| New Zealand              |          |       | X     | X     | X     | X     | X     |       |
