# Supplementary material for: Development and validation of influenza forecasting for 64 temperate and tropical countries
Source: PubMed Central journal article supplement (PMC6411231; doi:10.1371/journal.pcbi.1006742), 2019-02-27
Supplement: pcbi.1006742.s026.pdf [file pcbi.1006742.s026.pdf]

**Table S4. Peak timing and intensity accuracy at or after the predicted peak in the tropics by region, data type, and scaling.** Cells shaded in green indicate improved forecast accuracy over the reference level, while cells shaded in red indicate reduced accuracy.

| Variable  |                      | Peak Timing aOR (95% CI) | Peak Intensity aOR (95% CI) |
|-----------|----------------------|--------------------------|-----------------------------|
| Region    | Latin America        | 1.00 (ref)               | 1.00 (ref)                  |
|           | N Africa/Middle East | 0.730 (0.420, 1.279)     | 0.751 (0.412, 1.374)        |
|           | SE Asia              | 0.722 (0.491, 1.057)     | 0.799 (0.425, 1.516)        |
| Data Type | ILI+                 | 1.00 (ref)               | 1.00 (ref)                  |
|           | ARI+                 | 0.822 (0.505, 1.341)     | 1.772 (0.726, 4.335)        |
|           | SARI+                | 1.158 (0.702, 1.904)     | 1.182 (0.663, 2.109)        |
|           | Pneumonia+           | 1.042 (0.756, 1.420)     | 0.524 (0.207, 1.613)        |
| Scaling   | (2, 10]              | 1.00 (ref)               | 1.00 (ref)                  |
|           | (0, 2]               | 0.902 (0.528, 1.539)     | 0.899 (0.411, 1.942)        |
|           | (10, 20]             | 1.239 (0.707, 2.185)     | 1.321 (0.704, 2.471)        |
|           | (50, 300]            | 1.012 (0.556, 1.862)     | 0.700 (0.328, 1.473)        |
