# Supplementary material for: Development and validation of influenza forecasting for 64 temperate and tropical countries
Source: PLoS Comput Biol. 2019 Feb 27;15(2):e1006742. doi: 10.1371/journal.pcbi.1006742 (PMC6411231; doi:10.1371/journal.pcbi.1006742)
Supplement: S1 Dataset — The data provided here are not yet scaled by the chosen scaling factors. (CSV) [file pcbi.1006742.s002.csv]

time	Australia	Austria	Bangladesh	Belarus	Belgium	Bhutan	Bolivia	Brazil	Bulgaria	Cambodia	Canada	Chile	Colombia	Croatia	Cuba	Czechia	Denmark	Ecuador	Estonia	Finland	France	Georgia	Germany	Greece	Honduras	Hungary	Iceland	Indonesia	Ireland	Israel	Italy	Kazakhstan	Kenya	Kyrgyzstan	Latvia	Lithuania	Luxembourg	Madagascar	Mexico	Morocco	Netherlands	New.Zealand	Norway	Oman	Pakistan	Paraguay	Peru	Poland	Portugal
2009_15	-1	-1	-1	-1	6.4	-1	-1	-1	-1	-1	2.35789661319073	-1	-1	-1	-1	-1	-1	-1	-1	-1	-1	-1	-1	-1	123.92	-1	-1	-1	-1	-1	-1	-1	-1	-1	-1	-1	-1	-1	NA	-1	-1	-1	-1	-1	-1	-1	-1	-1	-1
2009_16	-1	-1	-1	-1	-1	-1	-1	-1	-1	-1	0.607089792336941	-1	-1	-1	-1	-1	-1	-1	-1	-1	-1	-1	-1	-1	227.2	-1	-1	-1	-1	-1	-1	-1	-1	-1	-1	-1	-1	-1	NA	-1	-1	-1	-1	-1	-1	-1	-1	-1	-1
2009_17	-1	-1	-1	-1	33	-1	-1	-1	-1	-1	0.799689203925845	-1	-1	-1	-1	-1	-1	-1	-1	-1	-1	-1	-1	-1	185.686567164179	-1	-1	-1	-1	-1	-1	-1	-1	-1	-1	-1	-1	-1	NA	-1	-1	-1	-1	-1	-1	-1	-1	-1	-1
2009_18	-1	-1	-1	-1	3.38461538461539	-1	-1	-1	-1	-1	0.793583174851773	-1	-1	-1	-1	-1	-1	-1	-1	-1	-1	-1	-1	-1	450.013698630137	-1	-1	-1	-1	-1	-1	-1	-1	-1	-1	-1	-1	-1	NA	-1	-1	-1	-1	-1	-1	-1	-1	-1	-1
2009_19	-1	-1	-1	-1	0	-1	-1	-1	-1	-1	0.739131023586503	-1	-1	-1	-1	-1	-1	-1	-1	-1	-1	-1	-1	-1	492.774193548387	-1	-1	-1	-1	-1	-1	-1	-1	-1	-1	-1	-1	-1	NA	-1	-1	-1	-1	-1	-1	-1	-1	-1	-1
2009_20	-1	-1	-1	-1	0	-1	-1	-1	-1	-1	0.589306319602845	-1	-1	-1	-1	-1	-1	-1	-1	-1	-1	-1	-1	-1	646.529069767442	-1	-1	-1	-1	-1	-1	-1	-1	-1	-1	-1	-1	-1	NA	-1	-1	-1	-1	-1	-1	-1	-1	-1	-1
2009_21	-1	-1	-1	-1	7.85714285714286	-1	-1	-1	-1	-1	3.15918653576438	-1	-1	-1	-1	-1	-1	-1	-1	-1	-1	-1	-1	-1	851.622641509434	-1	-1	-1	-1	-1	-1	-1	-1	-1	-1	-1	-1	-1	NA	-1	-1	-1	-1	-1	-1	-1	-1	-1	-1
2009_22	-1	-1	-1	-1	0	-1	-1	-1	-1	-1	2.36692892849381	-1	-1	-1	-1	-1	-1	-1	-1	-1	-1	-1	-1	-1	715.122994652406	-1	-1	-1	-1	-1	-1	-1	-1	-1	-1	-1	-1	-1	NA	-1	-1	-1	-1	-1	-1	-1	-1	-1	-1
2009_23	-1	-1	-1	-1	0	-1	-1	-1	-1	-1	10.275032967033	-1	-1	-1	-1	-1	-1	-1	-1	-1	-1	-1	-1	-1	413.25	-1	-1	-1	-1	-1	-1	-1	-1	-1	-1	-1	-1	-1	NA	-1	-1	-1	-1	-1	-1	-1	-1	-1	-1
2009_24	-1	-1	-1	-1	0	-1	-1	-1	-1	-1	12.1823400999694	-1	-1	-1	-1	-1	-1	-1	-1	-1	-1	-1	-1	-1	654.528455284553	-1	-1	-1	-1	-1	-1	-1	-1	-1	-1	-1	-1	-1	NA	314.545454545455	-1	-1	-1	-1	-1	-1	-1	-1	-1
2009_25	-1	-1	-1	-1	6.13888888888889	-1	-1	-1	-1	-1	6.91132115749526	-1	-1	-1	-1	-1	-1	-1	-1	-1	-1	-1	-1	-1	873.853658536585	-1	-1	-1	-1	-1	-1	-1	-1	-1	-1	-1	-1	-1	NA	132.243243243243	-1	-1	-1	-1	-1	-1	-1	-1	-1
2009_26	-1	-1	-1	-1	7.25	-1	-1	-1	-1	-1	6.13984094337035	-1	-1	-1	-1	-1	-1	-1	-1	-1	-1	-1	-1	-1	720.209302325581	-1	-1	-1	-1	-1	-1	-1	-1	-1	-1	-1	-1	-1	NA	216.117647058824	-1	-1	-1	-1	-1	-1	-1	-1	-1
2009_27	-1	-1	-1	-1	7.56962025316456	-1	-1	-1	-1	-1	3.27406649616368	-1	-1	-1	-1	-1	-1	-1	-1	-1	-1	-1	-1	-1	938.464285714286	-1	-1	-1	-1	-1	-1	-1	-1	-1	-1	-1	-1	-1	NA	129.894736842105	-1	-1	-1	-1	-1	-1	-1	-1	-1
2009_28	-1	-1	-1	-1	15.0051546391753	-1	-1	-1	87.875	-1	3.70883851805534	-1	-1	3.65217391304348	-1	-1	-1	-1	85.9130434782609	-1	-1	1.1	-1	-1	985.6	21.1011235955056	-1	-1	4.19475655430712	134.013452914798	-1	-1	-1	-1	24.8918918918919	-1	7.57317073170732	-1	NA	36.5263157894737	12	-1	10.304	-1	-1	-1	-1	26.4444444444444	-1
2009_29	-1	-1	-1	-1	13.3	-1	-1	-1	-1	-1	-1	-1	-1	30.4655172413793	-1	-1	-1	-1	100.428571428571	-1	-1	0.740740740740741	-1	-1	978.510638297872	16.1728395061728	-1	-1	4.85714285714286	216.554112554113	-1	-1	-1	0	13.4193548387097	-1	4.08227848101266	-1	NA	158.352941176471	11.8962264150943	-1	67.7436823104693	-1	-1	-1	-1	5.18181818181818	-1
2009_30	-1	-1	-1	-1	6.51851851851852	-1	-1	-1	-1	-1	-1	-1	-1	3.58536585365854	-1	-1	-1	-1	164.571428571429	-1	-1	0.428571428571429	-1	-1	774.413793103448	0	-1	-1	14.8829039812646	269.714535901926	-1	-1	-1	0	12.3448275862069	-1	4.05194805194805	-1	NA	175.608695652174	29.0717703349282	-1	67.0707070707071	-1	-1	-1	-1	11.008064516129	-1
2009_31	-1	-1	-1	-1	15.8181818181818	-1	-1	-1	-1	-1	-1	-1	-1	1.9047619047619	-1	-1	-1	-1	76.9523809523809	-1	-1	3.46938775510204	-1	-1	705.185185185185	41.2708333333333	-1	-1	15.8116480793061	529.790764790765	-1	-1	-1	0	22.1797752808989	-1	3.87234042553191	-1	NA	188.222222222222	27.9496981891348	-1	74.75701839303	-1	-1	-1	-1	14.1344537815126	-1
2009_32	-1	-1	-1	-1	12.5669291338583	-1	-1	-1	-1	-1	-1	-1	-1	2.48888888888889	-1	-1	-1	-1	116.346153846154	-1	-1	0.316666666666667	810.491071428571	-1	701.898305084746	21.1842105263158	-1	-1	15.609756097561	335.132450331126	-1	-1	-1	0	0	-1	6.17088607594937	-1	NA	192.857142857143	43.1052631578947	-1	69.972972972973	-1	-1	-1	-1	23.0088495575221	-1
2009_33	-1	-1	-1	-1	12	-1	-1	-1	-1	-1	-1	-1	-1	2.45454545454545	-1	-1	-1	-1	76.4745762711865	-1	-1	0	1239.21621621622	-1	733.653333333333	-1	-1	-1	15.782012195122	314.63475177305	-1	-1	-1	-1	24.8301886792453	-1	3.49006622516556	-1	NA	177.116279069767	18.6	-1	65.1265332472563	-1	-1	-1	-1	41.8909090909091	-1
2009_34	-1	-1	-1	-1	14.5833333333333	-1	-1	-1	542.647058823529	-1	-1	-1	-1	6.24390243902439	-1	-1	-1	-1	26.9285714285714	-1	-1	0.375	1347.375	-1	690.762711864407	27.9583333333333	-1	-1	11.6866438356164	276.899592944369	-1	-1	-1	242.1	0	-1	2.20720720720721	-1	NA	230.964285714286	33.0882352941177	-1	85.7332789559543	-1	-1	-1	-1	12.7272727272727	-1
2009_35	-1	-1	-1	-1	9	-1	-1	-1	-1	-1	-1	-1	-1	54.6938775510204	-1	-1	-1	-1	75.3684210526316	-1	-1	0.709677419354839	788.033898305085	-1	539.329787234043	23.2173913043478	-1	-1	9.50393700787402	196.797829036635	-1	-1	-1	57.6153846153846	-1	-1	3.03649635036496	-1	NA	139.777777777778	24.672131147541	-1	92.5227003553099	-1	-1	-1	-1	20.2173913043478	-1
2009_36	-1	-1	-1	-1	7.05494505494505	-1	-1	-1	62.6666666666667	-1	0.774137931034483	-1	-1	31.5985401459854	-1	-1	-1	-1	373.2	-1	-1	1.46153846153846	657.325581395349	-1	662.48	53.3142857142857	-1	-1	11.1746031746032	176.806378132118	-1	-1	-1	107.285714285714	0	-1	6.35294117647059	-1	NA	0	25.469387755102	-1	78.9973985431842	-1	-1	-1	-1	26.0416666666667	-1
2009_37	-1	-1	-1	-1	9.99428571428571	-1	-1	-1	439.75	-1	1.02804912882034	-1	-1	91.0588235294118	-1	21.7525773195876	1.66394779771615	-1	288.521739130435	-1	-1	0.304347826086957	1098.68181818182	7.80487804878049	417.857142857143	268.613924050633	-1	-1	18.3428571428571	259.025174825175	-1	-1	-1	0	14.0882352941176	-1	0	-1	NA	163.555555555556	23.2	-1	67.4863387978142	-1	-1	-1	-1	81.6666666666667	-1
2009_38	-1	-1	-1	-1	18.6742857142857	-1	-1	-1	472	-1	1.03752826715751	-1	-1	17.0232558139535	-1	-1	2.76164383561644	-1	193.512195121951	-1	-1	0	887.464285714286	-1	468.552631578947	389.745762711864	-1	-1	37.9192938209332	357.868085106383	-1	-1	-1	-1	16.5	-1	13.6221374045802	-1	NA	0	20.6888888888889	-1	61.7174496644295	-1	-1	-1	-1	0	-1
2009_39	-1	-1	-1	-1	36.5909090909091	-1	-1	-1	393.6	-1	1.71299942868025	-1	-1	4.56	-1	0	0.752508361204013	-1	0	-1	-1	0.666666666666667	708.8	-1	232.235294117647	19.3064516129032	-1	-1	46.7889908256881	283.761154855643	-1	-1	-1	78.2105263157895	0	-1	21.3841961852861	-1	NA	98.9166666666667	22.7906976744186	-1	68.2407407407407	-1	-1	-1	-1	21.3913043478261	-1
2009_40	-1	-1	-1	-1	69.4905660377358	-1	-1	-1	274.625	-1	2.15229645929186	-1	-1	2.37037037037037	-1	-1	5.51351351351351	-1	138.72	-1	-1	0	1275.71428571429	-1	496.333333333333	460.8	-1	-1	55.1630434782609	276.520393811533	-1	-1	-1	0	0	-1	26.9642857142857	-1	NA	218.1	33.2307692307692	-1	91.6961130742049	-1	-1	-1	-1	80.5	-1
2009_41	-1	-1	-1	-1	114.423076923077	-1	-1	-1	-1	-1	5.08052218114603	-1	-1	0.529411764705882	-1	-1	14.6296296296296	-1	0	-1	-1	0	2895.65517241379	-1	192.5	663.902777777778	-1	-1	54.2043010752688	186.276	-1	-1	-1	589.333333333333	0	-1	32.2850779510022	-1	NA	192.068965517241	46.609756097561	-1	75.8695150115473	-1	-1	-1	-1	82.695652173913	-1
2009_42	-1	-1	-1	-1	279	-1	-1	-1	1042	-1	13.2142158747597	-1	-1	2.02127659574468	-1	177.125	41.1195652173913	-1	251.428571428571	-1	-1	2.52	4344.11764705882	-1	198.826923076923	704.571428571429	-1	-1	138.460111317254	164.787401574803	-1	-1	-1	-1	0	-1	40.2754098360656	-1	NA	43.1	81.1836734693878	-1	131.069958847737	-1	-1	-1	-1	0	-1
2009_43	-1	-1	-1	-1	840.46261682243	-1	-1	-1	2032.25	-1	30.8260051191179	-1	-1	23.4473684210526	-1	339.113924050633	29.2134831460674	-1	373.538461538462	-1	-1	2.57142857142857	5713.10869565217	-1	186.34	429.980198019802	-1	-1	206.947608200456	337.009884678748	-1	-1	-1	0	27.3670886075949	-1	23.9344262295082	-1	NA	1127.73214285714	90.6206896551724	-1	524.223958333333	-1	-1	-1	-1	150.645833333333	-1
2009_44	-1	-1	-1	-1	805.720136518771	-1	-1	-1	3279.94117647059	-1	39.5838553370787	-1	-1	75.1739130434783	-1	893.477477477477	-1	-1	1125.50847457627	-1	-1	3.70212765957447	8188.63157894737	-1	301.451612903226	417.205882352941	-1	-1	165.444646098004	862.584905660377	-1	-1	-1	1011	41.2396694214876	-1	65.4867256637168	-1	NA	1979.95794392523	152.707581227437	-1	1396.18745056683	-1	-1	-1	-1	283.619047619048	-1
2009_45	-1	-1	-1	-1	548.634241245136	-1	-1	-1	4816.35820895522	-1	36.6805665615736	-1	-1	493.595744680851	-1	1615.79797979798	213.437722419929	-1	1581.61445783133	-1	-1	10.1558441558442	12538.2144927536	110.833333333333	292	699.670588235294	-1	-1	96.9784946236559	1491.84636118598	-1	-1	-1	816.340909090909	305.242937853107	-1	15.9416058394161	-1	NA	883.057544757033	191.171328671329	-1	2901.41629317163	-1	-1	-1	-1	530.852173913043	-1
2009_46	-1	-1	-1	-1	343.821739130435	-1	-1	-1	2869.37165775401	-1	23.6922004848622	-1	-1	2126.45454545455	-1	2405.33333333333	469.492430988424	-1	1586.63855421687	-1	-1	14.5643153526971	16748.9723756906	210.713120830245	303.677419354839	1669.38775510204	-1	-1	69.1755319148936	1955.99843382929	-1	-1	-1	15419.3684210526	786.030150753769	-1	24.7058823529412	-1	NA	4081.00294985251	232.417582417582	-1	1408.91345672836	-1	-1	-1	-1	1052.40677966102	-1
2009_47	-1	-1	-1	-1	190.238095238095	-1	-1	-1	1565.71641791045	-1	12.6123096286973	-1	-1	7329.56381260097	-1	5492.40579710145	474.693711967546	-1	3402.5905511811	-1	-1	39.0970149253731	16438.7147147147	357.296614210777	244.285714285714	3497.29330708661	-1	-1	59.5710332103321	1545.65356004251	-1	-1	-1	35242.4411764706	1238.04210526316	-1	29.575	-1	NA	4678.62337662338	134.171052631579	-1	923.879781420765	-1	-1	-1	-1	1923.52555555556	-1
2009_48	-1	-1	-1	-1	115.327868852459	-1	-1	-1	1008.73493975904	-1	5.37786943258084	-1	-1	4915.89249146758	-1	7528.4972972973	264.570071258907	-1	4462.46428571429	-1	-1	45.6	12648.45	541.991637323944	244	4143.19156414763	-1	-1	27.8696629213483	1404.21406086044	-1	-1	-1	14193.3714285714	1358.18897637795	-1	33.5644444444444	-1	NA	8298.05958549223	106.408163265306	-1	474.373406193078	-1	-1	-1	-1	2742.49617021277	-1
2009_49	-1	-1	-1	-1	78.1111111111111	-1	-1	-1	872.605263157895	-1	2.15195050472159	-1	-1	2462.83365200765	-1	8071.48770491803	137.741935483871	-1	3933.45454545455	-1	-1	-1	9627.83798882682	384.635561160151	443.612903225806	4826.55319148936	-1	-1	12.1364256480218	1095.4703030303	-1	-1	-1	4785.05263157895	602.746031746032	-1	18.5858585858586	-1	NA	8270.0338028169	63.1475409836066	-1	326.192893401015	-1	-1	-1	-1	2175.32576985413	-1
2009_50	-1	-1	-1	-1	76.8	-1	-1	-1	963.087719298246	-1	1.27333259077746	-1	-1	876.182481751825	-1	8778.27510917031	173.192468619247	-1	2502.13253012048	-1	-1	125.87684729064	9590.67428571429	223.145631067961	626	4011.01704545455	-1	-1	8.35578583765112	689.010309278351	-1	-1	-1	2766.8	240.870967741935	-1	-1	-1	NA	9837.84924623116	45.7777777777778	-1	107.296875	-1	-1	-1	-1	1226.904	-1
2009_51	-1	-1	-1	-1	44.7213114754098	-1	-1	-1	775.6	-1	0.982270042194093	-1	-1	340.202429149798	-1	4187.745	-1	-1	3466.48936170213	-1	-1	182.857142857143	10329.5454545455	162.094736842105	0	2533.65	-1	-1	8.0168776371308	391.491749174918	-1	-1	-1	588.807692307692	275.846153846154	-1	20.2814814814815	-1	NA	5534.05747126437	22.0588235294118	-1	42.8336025848142	-1	-1	-1	-1	1085.82677165354	-1
2009_52	-1	-1	-1	-1	25.1935483870968	-1	-1	-1	-1	-1	0.373986820428336	-1	-1	133.324175824176	-1	-1	-1	-1	1939.16666666667	-1	-1	96.680981595092	7555.56818181818	-1	326.571428571429	856.585106382979	-1	-1	2.36486486486486	243.63255033557	-1	-1	-1	108.891891891892	116.711229946524	-1	31.6551724137931	-1	NA	5161.89215686275	13.8461538461538	-1	8.27433628318584	-1	-1	-1	-1	509.860465116279	-1
2009_53	-1	-1	-1	-1	14.3571428571429	-1	-1	-1	-1	-1	-1	-1	-1	193.331081081081	-1	-1	31.5714285714286	-1	1578.08695652174	-1	-1	83.7236842105263	-1	-1	-1	-1	-1	-1	2.13333333333333	95.1602023608769	-1	-1	-1	17.2695035460993	142.469273743017	-1	-1	-1	NA	-1	9.75	-1	2.5830258302583	-1	-1	-1	-1	232.909090909091	-1
2010_01	-1	-1	-1	-1	5.67567567567568	-1	-1	-1	482.72	-1	0.223137446947437	-1	-1	85.6363636363636	-1	-1	-1	-1	805.023952095808	-1	-1	25.7159090909091	6832.5	90.6806411837238	440	1016.35342465753	-1	-1	3.89965397923875	99.8719723183391	-1	-1	-1	0	222.222222222222	-1	24.4	-1	NA	6025.09289617486	10.2	-1	10.209375	-1	-1	-1	-1	354.629482071713	-1
2010_02	-1	-1	-1	-1	38.9032258064516	-1	-1	-1	-1	-1	0.114792899408284	-1	-1	37.3333333333333	-1	976.471428571429	5.6	-1	1045.98113207547	-1	-1	11.484375	6033.30612244898	22.9655172413793	122.272727272727	-1	-1	-1	1.60824742268041	42.9677419354839	-1	-1	-1	0	83.0696202531646	-1	-1	-1	NA	3628.90361445783	0	-1	3.70588235294118	-1	-1	-1	-1	178.037735849057	-1
2010_03	-1	-1	-1	-1	15.3	-1	-1	-1	-1	-1	0.0390211530485276	-1	-1	42.2222222222222	-1	-1	5.88679245283019	-1	745.681818181818	-1	-1	-1	4065.9	44.5481171548117	478.214285714286	-1	-1	-1	0.655367231638418	23.5398886827458	-1	-1	-1	0	106.929577464789	-1	-1	-1	NA	564.021978021978	8.52631578947368	-1	1.77689243027888	-1	-1	-1	-1	96.9911504424779	-1
2010_04	-1	-1	-1	-1	8.82352941176471	-1	-1	-1	-1	-1	0.0954791577137946	-1	-1	16.3564356435644	-1	-1	5.39393939393939	-1	306.346153846154	-1	-1	6.56862745098039	-1	35.4409090909091	171.538461538462	-1	-1	-1	0.836601307189543	20.9336609336609	-1	-1	-1	0	85.2830188679245	-1	-1	-1	NA	703.577777777778	8.19230769230769	-1	0.696666666666667	-1	-1	-1	-1	82.0689655172414	-1
2010_05	-1	-1	-1	-1	16.09375	-1	-1	-1	-1	-1	0.0627619047619048	-1	-1	16.2345679012346	-1	-1	7.33333333333333	-1	435	-1	-1	3.26923076923077	-1	51.3887688984881	392.806451612903	-1	-1	-1	0.363636363636364	15.564453125	-1	-1	-1	0	121.818181818182	-1	-1	-1	NA	-1	0	-1	1.5655737704918	-1	-1	-1	-1	102.027397260274	-1
2010_06	-1	-1	-1	-1	11.1111111111111	-1	-1	-1	-1	-1	0.0234935521688159	-1	-1	3.39344262295082	-1	-1	1.57777777777778	-1	453.676470588235	-1	-1	6.20967741935484	-1	30.445475638051	511.2	-1	-1	-1	0	13.0393700787402	-1	-1	-1	0	43.3050847457627	-1	-1	-1	NA	-1	11.6842105263158	-1	0.676229508196721	-1	-1	-1	-1	70.4375	-1
2010_07	-1	-1	-1	-1	8.4	-1	-1	-1	-1	-1	0.0497537728355838	-1	-1	17.1851851851852	-1	-1	2.78571428571429	-1	108.953846153846	-1	-1	2.3125	-1	-1	343.090909090909	-1	-1	-1	0	8.9060773480663	-1	-1	-1	770	44.3204419889503	-1	-1	-1	NA	-1	0	-1	0	-1	-1	-1	-1	125.222222222222	-1
2010_08	-1	-1	-1	-1	9	-1	-1	-1	-1	-1	0.024002833864683	-1	-1	0	-1	-1	4.5	-1	158.95652173913	-1	-1	1.5968992248062	-1	31.427027027027	561.666666666667	-1	-1	-1	0.141592920353982	3.74074074074074	-1	-1	-1	0	13.2376237623762	-1	-1	-1	NA	-1	0	-1	3	-1	-1	-1	-1	205.386363636364	-1
2010_09	-1	-1	-1	-1	3.94444444444444	-1	-1	-1	0	-1	0.0206213817059051	-1	-1	4.56521739130435	-1	196.309523809524	0	-1	96.2028985507246	-1	-1	1.20689655172414	1650.10714285714	13.9153846153846	626.769230769231	125.845588235294	-1	-1	0	10.3305785123967	-1	-1	-1	0	6.42564102564103	-1	0	-1	NA	-1	0	-1	0.723618090452261	-1	-1	-1	-1	118.695652173913	-1
2010_10	-1	-1	-1	-1	0	-1	-1	-1	0	-1	0.0516465193830763	-1	-1	0	-1	366.787878787879	8.4	-1	80	-1	-1	0	4434.34782608696	15.0599078341014	578.641304347826	223.919540229885	-1	-1	0	2.44444444444444	-1	-1	-1	1052.5	12.2330097087379	-1	2.91304347826087	-1	NA	-1	0	-1	0	-1	-1	-1	-1	154.792452830189	-1
2010_11	-1	-1	-1	-1	19.5294117647059	-1	-1	-1	0	-1	0.0344722102542008	-1	-1	0	-1	41.8	7.22448979591837	-1	49.6571428571429	-1	-1	0	836.333333333333	17.5972222222222	438.375	82.5882352941177	-1	-1	0	2.66666666666667	-1	-1	-1	575.5	32.5124378109453	-1	9.8	-1	NA	-1	0	-1	0.907407407407407	-1	-1	-1	-1	0	-1
2010_12	-1	-1	-1	-1	3.84615384615385	-1	-1	-1	0	-1	0.0624836316019206	-1	-1	0	-1	-1	13.030303030303	-1	51.8524590163934	-1	-1	0	4011.52941176471	6.05309734513274	660.545454545455	109.652173913043	-1	-1	0.132743362831858	0	-1	-1	-1	-1	6.37368421052632	-1	14	-1	NA	-1	4.42857142857143	-1	1.56351791530945	-1	-1	-1	-1	103.818181818182	-1
2010_13	-1	-1	-1	-1	0	-1	-1	-1	0	-1	0.0458615136876006	-1	-1	0	-1	180.705882352941	6.33333333333333	-1	52.6346153846154	-1	-1	0	0	4.19277108433735	132	83.2820512820513	-1	-1	0	0	-1	-1	-1	498.25	47.0769230769231	-1	0	-1	NA	-1	0	-1	0.175824175824176	-1	-1	-1	-1	25.0263157894737	-1
2010_14	-1	-1	-1	-1	0	-1	-1	-1	0	-1	0.0289514866979656	-1	-1	0	-1	44.0526315789474	2.6875	-1	56.9019607843137	-1	-1	0	3980.5	1.4375	352.08	62	-1	-1	0	0	-1	-1	-1	0	42.2596153846154	-1	-1	-1	NA	-1	2.08333333333333	-1	1.21311475409836	-1	-1	-1	-1	0	-1
2010_15	-1	-1	-1	-1	-1	-1	-1	-1	0	-1	0	-1	-1	0	-1	0	3.84375	-1	107.214285714286	-1	-1	0	0	0	455.888888888889	36.780487804878	-1	-1	0	0	-1	-1	-1	-1	19.5867768595041	-1	8.5	-1	NA	-1	6.2	-1	4.30656934306569	-1	-1	-1	-1	98.6842105263158	-1
2010_16	-1	-1	-1	-1	7.66666666666667	-1	-1	-1	0	-1	0.0122562674094708	-1	-1	0	-1	53.6666666666667	3.55555555555556	-1	157.894736842105	-1	-1	1.4	0	1.51111111111111	343.75	26.8518518518519	-1	-1	0.222222222222222	-1	-1	-1	-1	0	39.7524752475248	-1	0	-1	NA	-1	3.36363636363636	-1	3.34170854271357	-1	-1	-1	-1	0	-1
2010_17	-1	-1	-1	-1	9.4	-1	-1	-1	-1	-1	0.0139920948616601	-1	-1	-1	-1	234.666666666667	1.73333333333333	-1	0	-1	-1	1.36363636363636	0	2.12903225806452	445.666666666667	0	-1	-1	0	-1	-1	-1	-1	0	23.0322580645161	-1	12.6666666666667	-1	NA	-1	0	-1	4.74125874125874	-1	-1	-1	-1	55.6666666666667	-1
2010_18	-1	-1	-1	-1	4.66666666666667	-1	-1	-1	0	-1	0.0189937106918239	-1	-1	-1	-1	278.625	3.41176470588235	-1	74.030303030303	-1	-1	0	0	2.86666666666667	92.5333333333333	27.16	-1	-1	0	-1	-1	-1	-1	0	35.531914893617	-1	0	-1	NA	-1	0	-1	2.49438202247191	-1	-1	-1	-1	0	-1
2010_19	-1	-1	-1	-1	28	-1	-1	-1	0	-1	0.00800144822592324	-1	-1	-1	-1	109.833333333333	5	-1	69.4	-1	-1	0	0	0	345.923076923077	0	-1	-1	0	-1	-1	-1	-1	0	7.76923076923077	-1	20.3333333333333	-1	NA	-1	3.85714285714286	-1	6.46601941747573	-1	-1	-1	-1	0	-1
2010_20	-1	-1	-1	-1	0	-1	-1	-1	-1	-1	0.0175333857030636	-1	-1	-1	-1	34.4864864864865	0	-1	0	-1	-1	0	1476.16666666667	0	211.95652173913	58.875	-1	-1	0.106666666666667	-1	-1	-1	-1	0	0	-1	-1	-1	NA	-1	11	-1	2.93877551020408	-1	-1	-1	-1	0	-1
2010_21	-1	-1	-1	-1	0	-1	-1	-1	-1	-1	0.0336624775583483	-1	-1	-1	-1	-1	-1	-1	0	-1	-1	0	0	0	96.7857142857143	0	-1	-1	0	-1	-1	-1	-1	0	-1	-1	-1	-1	NA	-1	0	-1	11.563025210084	-1	-1	-1	-1	12.9285714285714	-1
2010_22	-1	-1	-1	-1	-1	-1	-1	-1	-1	-1	0	-1	-1	-1	-1	-1	-1	-1	0	-1	-1	0	0	0	66.6363636363636	1.63333333333333	-1	-1	0	-1	-1	-1	-1	0	0	-1	-1	-1	NA	-1	0	-1	4.99270072992701	-1	-1	-1	-1	0	-1
2010_23	-1	-1	-1	-1	40	-1	-1	-1	0	-1	0.0052093973442288	-1	-1	-1	-1	-1	-1	-1	0	-1	-1	0	1269.8	0	252.272727272727	2.13698630136986	-1	-1	0	-1	-1	-1	-1	0	-1	-1	-1	-1	NA	-1	0	-1	2.92105263157895	-1	-1	-1	-1	0	-1
2010_24	-1	-1	-1	-1	-1	-1	-1	-1	-1	-1	0.00597210113339146	-1	-1	-1	-1	-1	-1	-1	0	-1	-1	7.66666666666667	0	0	116.857142857143	0	-1	-1	0	-1	-1	-1	-1	0	-1	-1	-1	-1	NA	-1	0	-1	2.67961165048544	-1	-1	-1	-1	0	-1
2010_25	-1	-1	-1	-1	-1	-1	-1	-1	-1	-1	0	-1	-1	-1	-1	-1	-1	-1	0	-1	-1	0	0	0	173	0	-1	-1	0	-1	-1	-1	-1	-1	-1	-1	-1	-1	NA	-1	0	-1	0	-1	-1	-1	-1	0	-1
2010_26	-1	-1	-1	-1	-1	-1	-1	-1	-1	-1	0.0353236714975845	-1	-1	-1	-1	-1	-1	-1	212	-1	-1	-1	-1	0	133.888888888889	0	-1	-1	0	-1	-1	-1	-1	-1	-1	-1	-1	-1	NA	-1	10	-1	0	-1	-1	-1	-1	0	-1
2010_27	-1	-1	-1	-1	-1	-1	-1	-1	-1	-1	0.0124256951102589	-1	-1	-1	-1	-1	-1	-1	62.7692307692308	-1	-1	-1	0	0	601.806451612903	0	-1	-1	0	-1	-1	-1	-1	0	-1	-1	-1	-1	NA	-1	-1	-1	0.746031746031746	-1	-1	-1	-1	0	-1
2010_28	-1	-1	-1	-1	-1	-1	-1	-1	-1	-1	0.0566517857142857	-1	-1	-1	-1	-1	-1	-1	0	-1	-1	-1	0	0	724.428571428571	0	-1	-1	0	-1	-1	-1	-1	0	-1	-1	-1	-1	NA	-1	0	-1	0	-1	-1	-1	-1	0	-1
2010_29	-1	-1	-1	-1	-1	-1	-1	-1	0	-1	0	-1	-1	-1	-1	-1	-1	-1	0	-1	-1	-1	0	0	1161.39130434783	0	-1	-1	0	-1	-1	-1	-1	0	-1	-1	-1	-1	NA	-1	0	-1	0	-1	-1	-1	-1	0	-1
2010_30	-1	-1	-1	-1	0	-1	-1	-1	0	-1	0.00460296096904441	-1	-1	-1	-1	-1	-1	-1	0	-1	-1	-1	0	0	891.225	0	-1	-1	0	-1	-1	-1	-1	0	-1	-1	-1	-1	NA	-1	-1	-1	1.10843373493976	-1	-1	-1	-1	0	-1
2010_31	-1	-1	-1	-1	-1	-1	-1	-1	-1	-1	0	-1	-1	-1	-1	-1	-1	-1	0	-1	-1	-1	0	0	1652.85714285714	0	-1	-1	0	-1	-1	-1	-1	0	-1	-1	-1	-1	NA	-1	-1	-1	0	-1	-1	-1	-1	0	-1
2010_32	-1	-1	-1	-1	-1	-1	-1	-1	-1	-1	0.0258390177353342	-1	-1	-1	-1	-1	-1	-1	0	-1	-1	-1	0	0	1790.5641025641	0	-1	-1	0	-1	-1	-1	-1	-1	-1	-1	-1	-1	NA	-1	-1	-1	0	-1	-1	-1	-1	0	-1
2010_33	-1	-1	-1	-1	-1	-1	-1	-1	-1	-1	0.00425855513307985	-1	-1	-1	-1	-1	-1	-1	-1	-1	-1	-1	0	-1	1278.82051282051	0	-1	-1	0	-1	-1	-1	-1	-1	-1	-1	-1	-1	NA	-1	0	-1	1.01694915254237	-1	-1	-1	-1	0	-1
2010_34	-1	-1	-1	-1	-1	-1	-1	-1	-1	-1	0.0554160982264666	-1	-1	-1	-1	-1	-1	-1	0	-1	-1	-1	0	-1	868.75	0	-1	-1	0	-1	-1	-1	-1	-1	-1	-1	-1	-1	NA	-1	0	-1	0	-1	-1	-1	-1	-1	-1
2010_35	-1	-1	-1	-1	0	-1	-1	-1	0	-1	0.0129184549356223	-1	-1	-1	-1	-1	-1	-1	0	-1	-1	0	0	0	523.121951219512	0	-1	-1	0	-1	-1	-1	-1	-1	0	-1	-1	-1	NA	-1	1.07692307692308	-1	0	-1	-1	-1	-1	136	-1
2010_36	-1	-1	-1	-1	0	-1	-1	-1	-1	-1	0.00934662236987818	-1	-1	-1	-1	-1	-1	-1	0	-1	-1	0	0	0	225.428571428571	0	-1	-1	0	-1	-1	-1	-1	-1	-1	-1	-1	-1	NA	-1	0	-1	0	-1	-1	-1	-1	0	-1
2010_37	-1	-1	-1	-1	0	-1	-1	-1	-1	-1	0.0348441926345609	-1	-1	-1	-1	-1	-1	-1	0	-1	-1	0	0	0	164.555555555556	0	-1	-1	0	-1	-1	-1	-1	0	0	-1	-1	-1	NA	-1	0	-1	0	-1	-1	-1	-1	0	-1
2010_38	-1	-1	-1	-1	0	-1	-1	-1	-1	-1	0.0876369327073552	-1	-1	-1	-1	-1	-1	-1	0	-1	-1	1.6	866	0	272.666666666667	0	-1	-1	0	-1	-1	-1	-1	0	-1	-1	-1	-1	NA	0	0	-1	0	-1	-1	-1	-1	55.9090909090909	-1
2010_39	-1	-1	-1	-1	0	-1	-1	-1	-1	-1	0.108510638297872	-1	-1	-1	-1	-1	-1	-1	0	-1	-1	0	1043.44444444444	0	0	0	-1	-1	0	-1	-1	-1	-1	0	0	-1	-1	-1	NA	189.714285714286	0	-1	1.525	-1	-1	-1	-1	0	-1
2010_40	-1	0	-1	638.458823529412	0	-1	-1	-1	-1	-1	0.095361216730038	-1	-1	0	-1	-1	0	-1	117.58064516129	-1	-1	31.64	0	0	163.714285714286	0	-1	-1	0	0	-1	-1	-1	0	0	0	0	-1	NA	0	0	-1	2.45925925925926	-1	5.27777777777778	-1	-1	0	0
2010_41	-1	0	-1	-1	0	-1	-1	-1	0	-1	0.158496240601504	-1	-1	0	-1	-1	0	-1	130.535714285714	0	-1	0	3150.57142857143	13.8333333333333	144.105263157895	0	-1	-1	0.4	13.5106382978723	-1	0	-1	0	0	-1	0	-1	NA	0	0	-1	1.03053435114504	-1	10.2564102564103	-1	-1	0	0
2010_42	-1	0	-1	-1	1.72	-1	-1	-1	0	-1	0.136166056166056	-1	-1	0	-1	0	0	-1	66.2592592592593	0	-1	0	609.176470588235	0	167.571428571429	0	-1	-1	0.202702702702703	19.2222222222222	-1	0	-1	0	0	0	0	-1	NA	0	0.59375	-1	0.885906040268456	-1	9.93243243243243	-1	-1	33.9565217391304	0
2010_43	-1	0	-1	-1	5.57142857142857	-1	-1	-1	0	-1	0.18459324155194	-1	-1	0	-1	0	0	-1	0	0	-1	0	1188.63157894737	-1	0	0	-1	-1	0	10.728813559322	-1	-1	-1	0	0	0	0	-1	NA	0	1.31818181818182	-1	1.37755102040816	-1	8.13559322033898	-1	-1	0	0
2010_44	-1	0	-1	341.824817518248	0	-1	-1	-1	0	-1	0.117202014549524	-1	-1	-1	-1	57.741935483871	0	-1	0	0	-1	0	0	0	159.692307692308	0	-1	-1	0	20.6052631578947	-1	-1	-1	86	0	0	0	-1	NA	0	0	-1	1.27826086956522	-1	15.8103448275862	-1	-1	0	0.2
2010_45	-1	0	-1	0	0	-1	-1	-1	0	-1	0.302245002562788	-1	-1	-1	-1	498.571428571429	0	-1	0	0	-1	0	540.590909090909	0	0	0	-1	-1	0	28.3870967741935	-1	-1	-1	0	0	0	0	-1	NA	68.125	0.557692307692308	-1	0	-1	15.2857142857143	-1	-1	0	0.5
2010_46	-1	0	-1	0	4.75	-1	-1	-1	0	-1	0.373907992565056	-1	-1	0	-1	-1	3.59615384615385	-1	0	0	-1	3.03333333333333	569.285714285714	0	0	0	-1	-1	0	20.8627450980392	0	-1	-1	0	0	0	15.5	-1	NA	0	0.888888888888889	-1	0.88	-1	9.9	-1	-1	0	0
2010_47	-1	0	-1	0	7.05882352941176	-1	-1	-1	0	-1	0.936078753076292	-1	-1	0	-1	0	6.60714285714286	-1	83.2857142857143	0	-1	2.13333333333333	1148.33333333333	0	267.69696969697	0	-1	-1	0.260869565217391	51.0823529411765	93.7808219178082	0	-1	0	0	0	0	-1	NA	140.923076923077	1.44	-1	6.62790697674419	-1	17.2666666666667	-1	-1	11.6170212765957	1
2010_48	-1	0	-1	0	17.6521739130435	-1	-1	-1	0	-1	1.67760263929619	-1	-1	0	-1	-1	21.6744186046512	-1	66.1884057971015	0	-1	21.7179487179487	307.886363636364	0	76.9090909090909	0	-1	-1	0.149532710280374	30.6574074074074	127.2	0	-1	0	0	9.5	6	-1	NA	109.5	1.38181818181818	-1	12.0251396648045	-1	12.3333333333333	-1	-1	50.0869565217391	7
2010_49	-1	23.3809523809524	-1	743.325153374233	48.2954545454545	-1	-1	-1	0	-1	2.50899866932801	-1	-1	0	-1	-1	25.2040816326531	-1	195.247058823529	0	-1	0	741.435897435897	0	108.272727272727	0	0	-1	3.9327731092437	115.818181818182	42.7887323943662	0	-1	0	17.3076923076923	2.63636363636364	22	-1	NA	321.363636363636	2.12592592592593	-1	23.6899441340782	-1	17.0188679245283	-1	-1	57.7674418604651	2.625
2010_50	-1	0	-1	914.97	100.8	-1	-1	-1	0	-1	3.84962074735081	-1	-1	1.125	-1	-1	47.7142857142857	-1	174.575342465753	0	-1	0	7713.21428571429	0	42.9047619047619	29.3246753246753	0.75	-1	15.7377049180328	219.046025104602	338.739130434783	512.683333333333	-1	0	45.3333333333333	9.66666666666667	40.4210526315789	-1	NA	388.033333333333	4.46601941747573	-1	64.1666666666667	-1	18.8275862068966	-1	-1	68.2702702702703	6.85714285714286
2010_51	-1	75.8709677419355	-1	1770.19259259259	200.676056338028	-1	-1	-1	0	-1	6.78716194790487	-1	-1	6.18279569892473	-1	-1	117.63829787234	-1	486.621621621622	0	-1	1.61764705882353	4692.92307692308	0	44.4117647058824	217.528301886792	1.05263157894737	-1	62.5406824146982	663.11724137931	706.438356164384	0	-1	276.230769230769	97.0588235294118	58.1	25.2	-1	NA	628.864864864865	3.50678733031674	-1	102.227272727273	-1	25.6388888888889	-1	-1	0	11.5384615384615
2010_52	-1	40.3846153846154	-1	2711.93984962406	191.945945945946	-1	-1	-1	0	-1	11.6844710936102	-1	-1	94.1259259259259	-1	118.8	105.736111111111	-1	225.417721518987	0	-1	3.67741935483871	-1	0	0	25.1929824561403	3.11111111111111	-1	151.170860927152	1013.70025839793	1404.96428571429	0	-1	359.375	199.490909090909	283.826086956522	36.5294117647059	-1	NA	863.688311688312	8.7710843373494	-1	82.8057324840764	-1	14.0350877192982	-1	-1	64	8.83928571428572
2011_01	-1	112.5	-1	3569.75	431.428571428571	-1	-1	-1	0	-1	10.9655896630497	-1	-1	175.070987654321	-1	282.962962962963	228.599033816425	0.91358024691358	762.626865671642	0	-1	28.5882352941176	8418.61607142857	35.5384615384615	72	294.553672316384	5.71428571428571	-1	233.324840764331	1983.15	1648.60501567398	0	-1	1409.14285714286	354.878048780488	779.80198019802	52.0625	-1	NA	1378.96551724138	38.9974160206718	-1	360	-1	78.625	-1	-1	214.292134831461	21.4615384615385
2011_02	-1	186.748466257669	-1	7761.04291845494	379.285714285714	-1	-1	-1	518.029411764706	-1	6.50792838159183	-1	-1	1117.93776824034	-1	870.416666666667	321.272727272727	0	2023.04184100418	0	-1	49.3454545454545	10806.18	103.9921875	38.4444444444444	0	8.11764705882353	-1	153.51160443996	2166.92617449664	2005.05617977528	1377.54703832753	14.9024390243902	2085	457.613577023499	1592.12307692308	-1	-1	NA	1191.71428571429	33.5239234449761	-1	370.370737755735	-1	36.3068783068783	-1	-1	493.241448692153	13.1228070175439
2011_03	-1	402.725490196078	-1	20425.6	399.388888888889	-1	-1	-1	0	-1	6.89918526130358	-1	-1	2398.66666666667	-1	1814.76595744681	373.555172413793	0	1936.47294589178	0	-1	110.4375	11471.9344978166	192.444219066937	32.40625	762.845637583893	12.0967741935484	-1	77.9653179190751	1978.15848214286	3507.29801324503	1929.44881889764	21.75	2390.4375	800.3125	2757.87878787879	94.0743243243243	-1	NA	1243.42608695652	43.4273127753304	-1	520.608070757325	-1	41.5511363636364	-1	-1	787.055033557047	26.6666666666667
2011_04	-1	483.452830188679	-1	26327.8723404255	415.603603603604	-1	-1	-1	2194	-1	5.12857358490566	-1	-1	3626.3967611336	-1	4468.04838709677	397.913793103448	0	2868.91044776119	0	-1	138.96943231441	13561.5298804781	407.885273972603	36.9259259259259	2597.91304347826	27.1428571428571	-1	58.2409012131716	1515.2578313253	-1	515.437185929648	27.1186440677966	1113.54166666667	1213.6972972973	3216.52132701422	80.3703703703704	-1	NA	2220.50793650794	27.9677419354839	-1	352.612939208031	-1	27.075	-1	-1	920.46402349486	12.7906976744186
2011_05	-1	726.086274509804	-1	27909.8476821192	357	-1	-1	-1	2162.24390243902	-1	5.76419302152932	-1	-1	2662.69683257919	-1	6080	303.243243243243	0	1966.06611570248	0	-1	397.933333333333	14708.6903914591	354.86580572712	75.2307692307692	1488.08158995816	38.9354838709677	-1	41.4520547945205	879.025423728814	5068.87546699875	8286.7722513089	48.6379310344828	2874.46153846154	951.418495297806	2125.57077625571	82.6524064171123	-1	NA	1617	39.1676300578035	-1	304.112569060773	-1	22.2716049382716	-1	-1	1179.40952380952	11.1538461538462
2011_06	-1	413.144876325088	-1	28985.9864341085	328.461538461538	-1	-1	-1	406.074074074074	-1	5.9743000618047	-1	-1	4041.02766798419	-1	6955.46428571429	346.350194552529	0	1767.87589498807	0	-1	660.184397163121	13547.6131147541	313.817345597897	0	2658.26732673267	70.7666666666667	-1	21.1940298507463	565.94964028777	4281.46781609195	19436.7272727273	80.1454545454545	2552.14285714286	773.5	1429.35245901639	80.3636363636364	-1	NA	1240.42553191489	24.3938223938224	-1	248.443636363636	-1	29.5	-1	-1	752.647335423197	10.3125
2011_07	-1	303.647058823529	-1	24649.3720608575	258.623188405797	0	-1	-1	728.571428571429	-1	4.75353149100257	-1	-1	4277.55471698113	-1	8691.5625	164.16	0	1300.96153846154	0	-1	590.318181818182	9623.05785123967	337.011286681716	0	2545.20797720798	101.2	-1	16.9795918367347	290.417910447761	2922.19113149847	57342.0714285714	66.3272727272727	1836.46153846154	529.534351145038	840.375	56.8214285714286	-1	NA	1259.53846153846	16.8559322033898	-1	165.483952702703	-1	30.1142857142857	-1	-1	540.19427402863	5.6875
2011_08	-1	217.013888888889	-1	25278.0872093023	94.16	-1	-1	-1	1306.55555555556	-1	6.49860337005833	-1	-1	3377.12352941176	-1	3615.61797752809	132.374100719424	0.528301886792453	889.356828193832	0	-1	489.270491803279	9437.78571428572	113.996273291925	0	1718.60869565217	76.5789473684211	-1	6.46153846153846	109.636363636364	1247.24226804124	4413.72727272727	62.9	442.125	397.690607734807	869.393258426966	14.6666666666667	-1	NA	771.545454545455	10.7743902439024	-1	113.71807628524	-1	13.4803921568627	-1	-1	468.628428927681	3
2011_09	-1	213.872340425532	-1	20094.2261640798	78.9333333333333	-1	-1	-1	1867.36842105263	-1	5.63363746958638	-1	-1	1624.8041958042	-1	2892.0350877193	63.6428571428571	0.352941176470588	1192.61788617886	0	-1	236.85393258427	10224.375	74.69717624148	67.6571428571429	1395.88571428571	60.8571428571429	-1	4.89510489510489	79.3354430379747	785.75117370892	0	81.0491803278689	1166	388.825065274151	381.681415929204	63.027027027027	-1	NA	1060.62068965517	7.8974358974359	-1	85.5261003070624	-1	18.9	-1	-1	647.092592592593	2.25
2011_10	-1	136.694444444444	-1	11749.1966173362	42.25	-1	-1	-1	1465.875	-1	3.91378671888909	-1	-1	1442.24137931034	-1	3108.46153846154	47.61	0.309859154929577	583.267605633803	0	-1	204.381443298969	10230.2671755725	48.4423897581792	42.0857142857143	940.660377358491	48	-1	1.93251533742331	35.8	564.130081300813	0	77.28	415.6875	618.117647058824	51.7142857142857	37.8461538461538	-1	NA	824	3.52941176470588	-1	48.5328467153285	-1	15.8688524590164	-1	-1	594.185328185328	0
2011_11	-1	128.515625	-1	8765.71666666667	26.4347826086957	-1	-1	-1	259.615384615385	-1	3.32936761229314	-1	-1	546.951219512195	-1	2450.41666666667	24.1558441558442	1	408.591346153846	0	-1	147.5	9843.12295081967	22.1060382916053	0	396.253164556962	75.15625	-1	0.470588235294118	18.972602739726	139.483606557377	30301	104.373134328358	131	371.790769230769	40.4461538461538	17.6470588235294	-1	NA	599.714285714286	4.82142857142857	-1	22.5176886792453	-1	4.90566037735849	-1	-1	225.641025641026	0
2011_12	-1	60.0776699029126	-1	6177.57798165138	0	-1	-1	-1	312.888888888889	-1	2.62361591695502	-1	-1	486.827586206897	-1	1281	48.5882352941177	0	260	0	-1	56.7627118644068	7689.27835051546	12.8247978436658	43.4666666666667	486.509433962264	70.7142857142857	-1	0.307692307692308	3.87387387387387	68.1226993865031	0	74.5411764705882	0	316.455399061033	33.0714285714286	4.63636363636364	-1	NA	425.25	2.11267605633803	-1	15.7746913580247	-1	0	-1	-1	216.552147239264	0
2011_13	-1	106.470588235294	-1	3720.16901408451	4.22222222222222	-1	-1	-1	204	-1	2.72703078677309	-1	-1	135.1	-1	631.348837209302	16.4788732394366	0	451.809523809524	0	-1	5.41176470588235	6120	6.61454545454546	0	332.756756756757	37.2	-1	0.852713178294574	6.82758620689655	18.3312883435583	0	83.1515151515152	276.8	171.784232365145	36.75	11	-1	NA	0	0.415094339622641	-1	16.3286956521739	-1	2	-1	-1	119.835714285714	0
2011_14	1.43589743589744	0	-1	4024.6618705036	3.18181818181818	-1	-1	-1	0	-1	1.50800100831863	-1	-1	307.2	-1	1005.72727272727	8.78048780487805	0	540.58904109589	0	-1	8.70833333333333	4932.20512820513	3.61290322580645	36.5428571428571	82.1428571428571	11.1176470588235	-1	0.448275862068966	-1	43.0693069306931	0	47.0149253731343	0	139.247311827957	0	0	-1	NA	0	1.22448979591837	-1	13.32	-1	0	-1	-1	37.4084507042254	0
2011_15	3.03501945525292	0	-1	1920.20080321285	2.77777777777778	-1	-1	-1	254.857142857143	-1	1.75350773195876	-1	-1	12.3809523809524	-1	231	2.85	0	248.709401709402	0	-1	18.8837209302326	1634	2.19101123595506	0	149.827586206897	0	-1	0	-1	39.0588235294118	0	37.8	-1	100.385185185185	29.5	0	-1	NA	0	0	-1	4.76759061833689	-1	0	-1	-1	37.6296296296296	-1
2011_16	2.47598253275109	0	-1	2427.22307692308	0	-1	-1	-1	110.785714285714	-1	1.18647887323944	-1	-1	2.5	-1	-1	3.38461538461539	0	186.043956043956	-1	-1	31.5	0	0	0	0	-1	-1	0	-1	0	4628.5	28.8545454545455	0	74.2378378378378	0	0	-1	NA	-1	0	-1	0.03690036900369	-1	0	-1	-1	9.50943396226415	-1
2011_17	1.25	0	-1	0	0	-1	-1	-1	159.9	-1	0.798757952135716	-1	-1	0	-1	101.125	0.805555555555555	0	46.3684210526316	0	-1	39.48	2795.5	0	0	0	-1	-1	0	-1	0	0	8.36363636363636	-1	30.4842105263158	0	0	-1	NA	0	0	-1	1.2375	-1	0	-1	-1	4.02857142857143	-1
2011_18	1.28169014084507	0	-1	0	0	118.857142857143	-1	-1	-1	-1	0.83176953125	-1	-1	-1	-1	-1	1.04166666666667	0	0	0	-1	0	0	16	0	0	1	-1	0.0845070422535211	-1	-1	0	36.4285714285714	0	6.78888888888889	0	0	-1	NA	0	0	1.10126582278481	0.625	-1	0	-1	-1	5.27272727272727	-1
2011_19	0.313868613138686	0	-1	0	0	47.6666666666667	-1	-1	-1	-1	0.507967741935484	-1	-1	-1	-1	-1	0	0	52.4107142857143	0	-1	0	0	-1	0	0	0	-1	0.075	-1	-1	0	24.7906976744186	-1	6.3469387755102	-1	-1	-1	NA	0	0	5.77777777777778	0.785964912280702	-1	0	-1	-1	8.74074074074074	-1
2011_20	1.0077519379845	0	-1	0	0	42.75	-1	-1	0	-1	0.27602377093463	-1	-1	-1	-1	-1	0.727272727272727	0	105.12	0	-1	0	0	-1	134.464285714286	0	0	-1	0.168674698795181	-1	-1	0	8.27272727272727	0	6.45744680851064	0	-1	-1	NA	-1	0	1.36585365853659	0	-1	0	-1	-1	0	-1
2011_21	0.973451327433628	0	-1	0	0	120	-1	-1	0	-1	0.205827814569536	-1	-1	-1	-1	-1	-1	0	0	0	-1	0	0	-1	0	-1	0	-1	0	-1	-1	0	24.6857142857143	-1	0	0	-1	-1	NA	-1	0	9.35294117647059	-1	-1	0	-1	-1	0	-1
2011_22	0.350574712643678	0	-1	0	0	-1	-1	-1	-1	-1	0.103108665749656	-1	-1	-1	-1	-1	-1	0	0	0	-1	0	0	-1	33.5714285714286	-1	-1	-1	0	-1	-1	0	23.7291666666667	-1	-1	-1	-1	-1	NA	-1	0	6.05	-1	-1	0	-1	-1	0	-1
2011_23	1.54440154440154	0	-1	0	-1	0	-1	-1	-1	-1	0.0400680272108844	-1	-1	-1	-1	-1	-1	0	0	0	-1	0	0	-1	84	-1	-1	-1	0	-1	-1	0	20.0727272727273	-1	-1	-1	-1	-1	NA	-1	0	22.0506329113924	-1	-1	1	-1	-1	0	-1
2011_24	1.96319018404908	0	-1	0	-1	0	-1	-1	0	-1	0.0185483870967742	-1	-1	-1	-1	-1	-1	0	0	0	-1	0	0	-1	41.6071428571429	-1	-1	-1	0	-1	-1	0	29.25	-1	0	0	-1	-1	NA	-1	0	31.1881188118812	-1	-1	2.78571428571429	-1	-1	0	-1
2011_25	7.25	0	-1	0	0	-1	-1	-1	0	-1	0.0104761904761905	-1	-1	-1	-1	-1	-1	0	0	-1	-1	0	0	-1	0	-1	-1	-1	0	-1	-1	0	37.8245614035088	-1	-1	0	-1	-1	NA	-1	0	26.1436464088398	-1	-1	8.66666666666667	-1	-1	10.3	-1
2011_26	4.85604606525912	0	-1	0	0	61	-1	-1	-1	-1	0.0249434737923947	-1	-1	-1	-1	-1	-1	0	0	-1	-1	0	1035.5	-1	24	-1	-1	-1	0	-1	-1	0	-1	-1	0	-1	-1	-1	NA	-1	0	42.9945945945946	-1	-1	3.375	-1	-1	0	-1
2011_27	12.9638989169675	0	-1	0	0	40	-1	-1	0	-1	0.0355508919202518	-1	-1	-1	-1	-1	-1	0	0	-1	-1	0	0	-1	224	-1	-1	-1	0	-1	-1	-1	22.4090909090909	-1	-1	-1	-1	-1	NA	-1	0	63.253164556962	-1	-1	13.4193548387097	-1	-1	0	-1
2011_28	12.5788590604027	0	-1	0	-1	89.375	-1	-1	-1	-1	0.0354310344827586	-1	-1	-1	-1	-1	-1	0	0	-1	-1	0	0	-1	212.742857142857	-1	-1	-1	0	-1	-1	0	19.1666666666667	-1	0	-1	-1	-1	NA	-1	0	-1	-1	-1	6.93333333333333	-1	-1	0	-1
2011_29	21.2756132756133	0	-1	0	-1	121	-1	-1	-1	-1	0.00575297941495125	-1	-1	-1	-1	-1	-1	0	0	0	-1	0	-1	-1	146.631578947368	-1	-1	-1	0	-1	-1	0	30.875	-1	0	0	-1	-1	NA	-1	0	85.1041666666667	-1	-1	1.92	-1	-1	0	-1
2011_30	27.2453371592539	0	-1	0	0	96	-1	-1	0	-1	0.0307792207792208	-1	-1	-1	-1	-1	-1	0	0	0	-1	0	-1	-1	226.875	-1	-1	-1	0	-1	-1	0	23.2333333333333	-1	0	-1	-1	-1	NA	-1	0	78.6716417910448	-1	-1	6.31578947368421	-1	-1	0	-1
2011_31	25.5823293172691	0	-1	0	-1	0	-1	-1	0	-1	0.00446341463414634	-1	-1	-1	-1	-1	-1	0	0	0	-1	0	3553	-1	484.869565217391	-1	-1	-1	0.0740740740740741	-1	-1	0	-1	-1	0	-1	-1	-1	NA	-1	0	44.88	0	-1	3.19148936170213	-1	-1	0	-1
2011_32	37.6919431279621	0	-1	0	-1	0	-1	-1	0	-1	0.0253872437357631	-1	-1	-1	-1	-1	-1	0	0	0	-1	0	-1	-1	651.666666666667	-1	-1	-1	0	-1	-1	0	15.2352941176471	-1	-1	-1	-1	-1	NA	-1	0	57.7993079584775	-1	-1	2.88235294117647	-1	-1	0	-1
2011_33	30.5714285714286	0	-1	0	-1	-1	-1	-1	-1	-1	-1	-1	-1	-1	-1	-1	-1	0	0	0	-1	0	0	-1	604.633333333333	-1	-1	-1	0	-1	-1	0	14.85	-1	-1	0	-1	-1	NA	-1	0	57.7474402730375	0	-1	6.18181818181818	-1	-1	0	-1
2011_34	36.5301507537688	0	-1	0	-1	0	-1	-1	0	-1	0.0187431091510474	-1	-1	-1	-1	-1	-1	0	0	0	-1	0	0	-1	326.382978723404	-1	-1	-1	0	-1	-1	0	24	-1	0	-1	-1	-1	NA	-1	0	74.2589531680441	0	-1	4.60975609756098	-1	-1	0	-1
2011_35	26.1594827586207	0	-1	0	-1	0	-1	-1	-1	-1	0.0237534246575342	-1	-1	-1	-1	-1	-1	0	-1	-1	-1	0	-1	-1	193.328571428571	-1	-1	-1	0	-1	-1	0	5.32	-1	-1	-1	-1	-1	NA	-1	0.857142857142857	65.2785923753666	-1	-1	0.5	-1	-1	10.5	-1
2011_36	29.2117647058824	0	-1	0	0	-1	-1	-1	0	-1	0.0214572864321608	-1	-1	-1	-1	-1	-1	0	0	0	-1	0	0	-1	548	-1	-1	-1	0	-1	-1	0	10	-1	-1	-1	-1	-1	NA	-1	0	50.4065934065934	-1	-1	2.77941176470588	-1	-1	0	-1
2011_37	23.3263288009889	0	-1	0	0	16.4285714285714	-1	-1	-1	-1	0.022196041470311	-1	-1	-1	-1	-1	-1	1.01694915254237	0	0	-1	0	0	-1	342.415094339623	-1	-1	-1	0	-1	-1	0	6.44	-1	0	-1	-1	-1	NA	-1	0	69.5882352941177	-1	-1	2.4	-1	-1	0	-1
2011_38	25.6257594167679	0	-1	-1	0	0	-1	-1	0	-1	0.0139299610894942	-1	-1	-1	-1	-1	-1	0	0	0	-1	0	0	-1	291.409836065574	-1	-1	-1	0	-1	-1	0	7	-1	-1	0	-1	-1	NA	-1	0	45.8950276243094	-1	-1	7.69230769230769	-1	-1	0	-1
2011_39	24.8142493638677	0	-1	0	0	0	-1	-1	0	-1	0.0446088794926004	-1	-1	-1	-1	-1	-1	1.02857142857143	0	0	-1	0	0	0	202.222222222222	-1	-1	-1	0	-1	-1	0	3.52941176470588	-1	0	0	-1	-1	NA	0	0	47.5384615384615	-1	-1	10	-1	-1	0	-1
2011_40	15.6476608187134	0	-1	1342.34375	2.26666666666667	-1	-1	-1	-1	-1	0.0566666666666667	-1	-1	0	-1	-1	0	2.03125	0	-1	-1	0	0	0	277.609756097561	0	0	-1	0	-1	-1	0	9.16666666666667	-1	0	-1	0	-1	3841.28260869565	68.9090909090909	0	32.4610169491525	0.586538461538462	-1	3	-1	-1	-1	-1
2011_41	10.7956810631229	0	-1	0	0	0	-1	-1	0	-1	0.0229559748427673	-1	-1	0	-1	-1	0	1.01282051282051	0	-1	-1	0	0	0	296.386363636364	0	-1	-1	0	-1	-1	0	15.1136363636364	0	0	-1	0	-1	0	0	4.03846153846154	20.3684210526316	0.753554502369668	-1	8	-1	-1	-1	0
2011_42	5.95190380761523	0	-1	0	0	-1	-1	-1	0	-1	0.0475090252707581	-1	-1	0	-1	-1	0	2	0	0	-1	0	1713.5	0	118.384615384615	0	0	-1	0	-1	-1	0	7.875	0	0	-1	-1	-1	6782.75201612903	123.2	0	11.6407185628743	0.375711574952562	-1	26	-1	-1	-1	0
2011_43	2.27777777777778	0	-1	0	0	-1	-1	-1	0	-1	0.0379215270413574	-1	-1	0	-1	113	0	1.97058823529412	0	0	-1	0	0	0	165.9	54.7391304347826	0	-1	0	-1	-1	0	23.7096774193548	0	0	-1	0	-1	10420.9245283019	67.6315789473684	0	2.30538922155689	0.815533980582524	-1	22.8658536585366	-1	-1	-1	0
2011_44	2.48230088495575	0	-1	0	0	-1	-1	-1	0	-1	0.107606263982103	-1	-1	0	-1	351.384615384615	0	2.03571428571429	0	0	-1	0	0	0	138.434782608696	0	0	-1	0	5.77777777777778	-1	0	11.6869565217391	-1	0	-1	0	-1	12049.632183908	0	0	3.84905660377358	0.930496453900709	38.5614035087719	37.8860759493671	-1	-1	-1	0
2011_45	4.28954423592493	0	-1	0	0	-1	-1	-1	0	-1	0.103897889052528	-1	-1	0	-1	-1	0	1.02	0	0	-1	0	0	0	202.787878787879	0	0	-1	0	0	-1	0	23.7906976744186	-1	0	-1	0	-1	11749.4941860465	0	3.03571428571429	0.384615384615385	0.824224519940916	11.7272727272727	3	-1	-1	-1	0
2011_46	4.02439024390244	0	-1	0	4.28571428571429	-1	-1	-1	0	-1	0.0772871202396235	-1	-1	0	-1	-1	4.02631578947368	3.04109589041096	0	0	-1	0	907.470588235294	0	181.222222222222	0	0.666666666666667	-1	0.508064516129032	0	21.8536585365854	0	34.3061224489796	-1	0	-1	0	-1	18543.5216346154	84.7	0.461538461538462	1.70103092783505	1.71698113207547	10.2424242424242	11.4146341463415	-1	-1	-1	0
2011_47	3.19948186528497	0	-1	0	2.38888888888889	0	-1	-1	0	-1	0.118367346938776	-1	-1	0	-1	0	0	4	0	0	-1	0	0	0	79.2727272727273	0	0	-1	0.5	2.67213114754098	83.6885245901639	0	27.6363636363636	0	0	-1	0	-1	13359.3562827225	129.714285714286	0.575342465753425	1.14606741573034	1.1122599704579	19.7727272727273	9.95744680851064	-1	-1	-1	0
2011_48	4.4940119760479	0	-1	0	0	-1	-1	-1	0	-1	0.167409390444811	-1	-1	0	-1	383.076923076923	2.02631578947368	5.32258064516129	0	0	-1	0	762.095238095238	0	33	0	0	-1	0	15.8411214953271	82.5714285714286	0	18.0645161290323	0	10.0820895522388	-1	0	-1	21286.0587234043	288.545454545455	3.92156862745098	0	5.77718832891247	20	3.42105263157895	-1	-1	-1	0
2011_49	3.70418006430868	0	-1	0	3.65714285714286	0	-1	-1	0	-1	0.113169796857033	-1	-1	0	-1	231.025641025641	0	9.125	0	0	-1	0	634.621621621622	0	0	0	2	-1	0.164179104477612	8.47727272727273	82.9508196721311	0	9.53333333333333	0	0	-1	0	-1	68556.2307692308	320.0625	0.5859375	0	7.89165446559297	21.4285714285714	3	-1	-1	-1	0
2011_50	2.01556420233463	0	-1	0	1.84615384615385	10	-1	-1	0	-1	0.53914257228315	-1	-1	0	-1	47.2857142857143	0	12	0	0	-1	0	859.105263157895	0	0	36.7317073170732	1.21428571428571	-1	0.466165413533835	21.6791044776119	145.178571428571	0	10.3125	359.066666666667	9.70676691729323	-1	16.875	-1	146094.694105691	900.888888888889	0.220183486238532	1.5609756097561	8.48302469135802	34.78125	3.2258064516129	-1	-1	-1	0
2011_51	0.781914893617021	3.46478873239437	-1	0	5	-1	-1	-1	0	-1	0.503664974619289	-1	-1	0	-1	-1	0	19.2878787878788	0	0	-1	0	479.830508474576	0	48.6470588235294	0	1.53846153846154	-1	1.82352941176471	19.9078014184397	119.241573033708	0	8.5	497.636363636364	6.79012345679012	-1	0	-1	144540.943965517	1061.32075471698	0.582781456953642	0	19.1788235294118	29.4146341463415	14.0740740740741	-1	-1	-1	0.111111111111111
2011_52	5.16014234875445	2.43548387096774	-1	0	4.42857142857143	-1	-1	-1	0	-1	0.971128852580765	-1	-1	0	-1	89.2307692307692	0	17.1313131313131	50.3492063492063	0	-1	0	1979.55555555556	0	0	0	2.125	-1	1.38461538461538	42.8323699421965	750.696774193548	1034.92857142857	-1	1371.33333333333	31.1111111111111	-1	0	-1	202896.183673469	1294.37974683544	0.381578947368421	-1	15.6906779661017	82.9230769230769	17.3478260869565	-1	-1	-1	0
2012_01	0.712280701754386	10.64	-1	0	6	0	-1	-1	0	-1	1.01363808493373	-1	2473.36	0.25	-1	115.225806451613	0	24.2189781021898	0	0	-1	0	559.863636363636	7.35	30.2424242424242	37.5128205128205	4.77272727272727	-1	0.917030567685589	57.3157894736842	492.709497206704	3512	-1	410.75	44.816091954023	-1	6.91666666666667	-1	228899.915273775	1363.54716981132	0.692307692307692	-1	35.0085324232082	53.3720930232558	18.2222222222222	-1	-1	-1	0.461538461538462
2012_02	0.848214285714286	33	-1	941.483146067416	13.4117647058824	0	-1	-1	373.272727272727	-1	0.836209553158706	-1	1545.6694214876	2	-1	80.05	0	28.7567567567568	0	0	-1	18.875	2475.04761904762	10.962962962963	62.6470588235294	22.8285714285714	11.1428571428571	-1	3.41463414634146	67.3489932885906	883.058139534884	2087.92156862745	6.5625	2800	44.6108108108108	-1	22.1176470588235	-1	331871.948951686	1815	1.07462686567164	-1	31.4364525139665	20.5111111111111	18	-1	-1	-1	0.285714285714286
2012_03	3.40540540540541	6.81538461538462	-1	750.546875	30.2222222222222	0	-1	-1	2294.58823529412	-1	0.86105604566684	-1	1334.48704663212	0.162162162162162	-1	120.153846153846	0	21.8995433789954	30.8888888888889	0	-1	0	3638.18181818182	25.4761904761905	46.1818181818182	25.4705882352941	8.23529411764706	-1	2.11627906976744	116.968944099379	2189.74736842105	739.998829039813	-1	2981.8	69	-1	0	-1	301725.723645027	1632.37142857143	0.980645161290323	-1	45.4439024390244	25.1914893617021	1.82142857142857	-1	-1	-1	0.833333333333333
2012_04	3.22222222222222	56.8292682926829	-1	0	29.037037037037	88	-1	-1	2782.91666666667	-1	1.00151024811219	-1	2012.24242424242	5.28865979381443	-1	0	0	12	151.822033898305	0	-1	4.12	5453.84615384615	74.5833333333333	0	192.058252427184	29.4	-1	2.93085106382979	135.966850828729	4717.984	9073.68421052631	0.452830188679245	5416.11111111111	69.6315789473684	-1	9.3125	-1	299407.205724508	917.037037037037	1.05806451612903	-1	61.7139800285307	11.2380952380952	2.12121212121212	-1	-1	-1	1.07142857142857
2012_05	0.965665236051502	62.3582887700535	-1	0	152.16814159292	28.5	-1	-1	3723	-1	2.47112330349408	-1	1475.53153153153	27.1304347826087	-1	309.391304347826	2.72727272727273	13.1572580645161	83.8666666666667	0	-1	18.1875	6288.46875	169.244444444444	0	257.319587628866	20.48	-1	7.49152542372881	226.213836477987	5936.83333333333	6597.39325842697	1.30434782608696	791.391304347826	59.427135678392	-1	28.7142857142857	-1	291018.883838384	652.909090909091	1.50943396226415	-1	105.875845113706	55.5757575757576	6.08695652173913	-1	-1	-1	4.28571428571429
2012_06	1.70212765957447	168.533632286995	-1	0	104.385964912281	29.5833333333333	-1	-1	2807.5	-1	2.37078947368421	-1	1365.24	54	-1	747.809523809524	11.0625	18	420.9	0	-1	47	8453.19718309859	211.75	32.3103448275862	389.540229885057	84.4444444444444	-1	15.2690355329949	302.791208791209	4503.05594405594	6358.54819277108	3.20348837209302	-1	53.92	-1	-1	-1	225958.056208482	411.6	5.44444444444444	-1	200.335382895472	43.2978723404255	0	-1	-1	-1	8.27586206896552
2012_07	1.24137931034483	192.780487804878	-1	0	494.10752688172	0	-1	-1	3683.82857142857	-1	4.07934691599219	-1	1643.47857142857	159.641025641026	-1	367	15.05	13	411.587939698492	0	-1	50.037037037037	6760.92857142857	335.906976744186	67.1333333333333	1420.98387096774	121.392857142857	-1	23.7184115523466	441.381818181818	3172.28307692308	5308.78606965174	3.17647058823529	1216.5	162.180392156863	-1	62.7272727272727	-1	177927.721752498	486	9.94350282485876	-1	271.689723320158	80.2941176470588	12	-1	-1	-1	12.962962962963
2012_08	2.42293906810036	249.527065527066	-1	722.066666666667	372.75	15.8333333333333	-1	-1	2877.6	-1	4.76671641791045	-1	1449.11764705882	519.333333333333	-1	1182.22222222222	25.5211267605634	10.0452488687783	453.259459459459	0	-1	73.027027027027	10301.5438596491	481.745454545455	45.7083333333333	2814.72847682119	134.4	-1	24.1165048543689	360.490566037736	3096.56652360515	3049.65573770492	3.7165991902834	0	339.821862348178	-1	30.0952380952381	-1	157472.584103512	181.047619047619	14.0875	-1	345.516483516484	9.92857142857143	19.6176470588235	-1	-1	-1	19.2
2012_09	1.75722543352601	254.486607142857	-1	2535.328125	367.593495934959	2.66666666666667	-1	-1	1867.56818181818	-1	6.48091843153701	-1	1423.56040268456	1469.54545454545	-1	1131.07692307692	45.12	20.5333333333333	1279.0243902439	0	-1	130.516129032258	9218.36054421769	445.122222222222	49.44	3540.61855670103	100.531914893617	-1	19.921875	553.471428571429	1282.27272727273	1823.30237580994	1.61616161616162	0	307.176079734219	-1	126.171428571429	-1	110601.459854015	420	19.9393939393939	-1	250.983290488432	24.3333333333333	8	-1	-1	-1	19.9322033898305
2012_10	1.07692307692308	225.691139240506	-1	1342.125	189.75	-1	-1	-1	2597.97297297297	-1	8.71443321442727	-1	2567.73195876289	2512.88333333333	-1	1813.25925925926	40.5333333333333	6.05381165919283	1102.63507109005	0	-1	179.020408163265	10305.4090909091	478.369565217391	77.9333333333333	3823.38578680203	90.9090909090909	-1	13.1111111111111	399.229299363057	806.565789473684	2376.02510460251	7.48	0	585.75	-1	56.135593220339	-1	74756.5754276827	274.333333333333	30.31875	-1	293.6756126021	25.0714285714286	3.81578947368421	-1	-1	-1	22.5
2012_11	6.16710875331565	179.937931034483	-1	3113.6875	140.188888888889	76.8	-1	-1	1462.875	-1	7.90628000768197	-1	664.587360594796	1729.88819875776	-1	2346.5	29.2622950819672	9	1341.28205128205	0	-1	154.046511627907	6838.37288135593	353.752577319588	38.0357142857143	2050.5	36.6206896551724	-1	7.40963855421687	233.128378378378	357.884615384615	520.586206896552	1.4	0	708.329519450801	-1	70.5466666666667	-1	45970.9976798144	84	18.9160305343511	-1	199.430317848411	27.5151515151515	9.71428571428572	-1	-1	-1	11.5
2012_12	3.85593220338983	111.3	-1	7790.44578313253	77.7627118644068	150	-1	-1	1320.05	-1	9.50767853813164	-1	2021.91818181818	6273.09316770186	-1	2338.8679245283	30.6595744680851	4.96428571428571	907.3125	0	-1	101.739130434783	10740.043956044	220.153846153846	0	2771.61325966851	36.3076923076923	-1	3.97350993377483	276.049382716049	105.938461538462	290.413793103448	-1	0	500.661728395062	-1	50.1428571428571	-1	33506.8720626632	0	18.8275862068966	-1	155.014278159704	47.1	2.20689655172414	-1	-1	-1	1.85185185185185
2012_13	4.54069767441861	77.553488372093	-1	4521.24324324324	32.7894736842105	29.4545454545455	-1	-1	1067.11111111111	-1	4.61032347307938	-1	1190.4022556391	2837.69105691057	-1	1464.42857142857	5.24324324324324	12.5873015873016	1174.39873417722	0	-1	110.4	7850.61728395062	134.836363636364	221.75	1308.3488372093	16.7058823529412	-1	1.89873417721519	184	66.9117647058824	835.462962962963	3.31578947368421	0	531.738805970149	-1	29.3333333333333	-1	22259.5496453901	0	18.9759036144578	-1	115.363066202091	23.6206896551724	7.5609756097561	-1	-1	-1	1.64705882352941
2012_14	3.58484848484848	17.6640625	-1	5656.42	38.9565217391304	58.9090909090909	-1	-1	1177.5	-1	5.76070227497527	-1	6527.93388429752	2529.97530864198	-1	-1	2.7	5	624.992957746479	0	-1	150.322580645161	8447.76470588235	64.5806451612903	67.25	389.454545454545	0	-1	1.24137931034483	67.5	64.8936170212766	1351.88764044944	4.13793103448276	0	318.643097643098	-1	24	-1	9754.04464285714	184	14.020618556701	-1	2.26695842450766	7.04761904761905	1.74193548387097	-1	-1	-1	1
2012_15	3.12316715542522	1.39285714285714	-1	9870.49484536082	3.42857142857143	38.2307692307692	-1	-1	0	-1	5.07579079307201	-1	12130.4868035191	412.533333333333	-1	377.5	4.28571428571429	4.10619469026549	669.083832335329	0	-1	37.3809523809524	5905.28260869565	12.1666666666667	179.72972972973	347.052631578947	2.23076923076923	-1	3.04093567251462	21.1111111111111	107.052631578947	148.806722689076	1.48484848484848	0	376.505576208178	-1	3.85714285714286	-1	9026.47916666667	0	8.29508196721311	-1	22.6639427987743	13.6875	9.44444444444444	-1	-1	-1	0
2012_16	3.76884422110553	0.5	-1	6525.98333333333	9.66666666666667	11.6	-1	-1	0	-1	3.37422665006227	-1	6871.875	58.1	-1	631.238095238095	5.03571428571429	5.52380952380952	360.631578947368	0	-1	44.0769230769231	3181.94594594595	5.33333333333333	190.967741935484	235.40625	-1	-1	0.515151515151515	17.9636363636364	-1	0	7.36842105263158	0	325.027118644068	-1	7	-1	4784.74390243902	0	18.0625	-1	21.5389016018307	31.9565217391304	4	-1	-1	-1	-1
2012_17	3.59710144927536	0	-1	1419.93333333333	3.6	46.9411764705882	-1	-1	0	-1	4.15507977951842	-1	2083.59861591696	140	-1	174.25	2.69565217391304	0.959183673469388	414.588235294118	0	-1	0	2710.75	2.72727272727273	151.5	86.8	-1	-1	1.16129032258065	-1	10.7931034482759	0	2.51428571428571	0	260.967611336032	-1	5.71428571428571	-1	11686.8994413408	0	9.95555555555556	-1	10.006993006993	16.5405405405405	4.48275862068966	-1	-1	-1	-1
2012_18	2.32258064516129	0	-1	2641.28301886792	0	35.3333333333333	-1	-1	645	-1	1.88354079329249	-1	8956.42045454545	160.8	-1	244.75	1.66666666666667	4	315.632653061225	0	-1	12.4210526315789	1667.76470588235	9.2	125.333333333333	21.2727272727273	-1	-1	0.957894736842105	-1	-1	249.065217391304	2.68085106382979	0	71.1481481481482	-1	0	-1	21521.724137931	-1	10	0.525773195876289	5.71842105263158	32.4444444444444	2.25	-1	-1	-1	0.25
2012_19	2.52132701421801	0	-1	3505.39285714286	0	13.25	-1	-1	0	-1	0.84589628681178	-1	8287.48243559719	16.4705882352941	-1	-1	6.19354838709677	3.03896103896104	117.934065934066	0	-1	14.125	2368.5	-1	62.5454545454545	0	-1	-1	0.495575221238938	-1	-1	0	2.42857142857143	-1	29.7933884297521	-1	7.75	-1	16707.0055248619	-1	4.3	1.85810810810811	4.27057356608479	35.3076923076923	0	-1	-1	-1	-1
2012_20	4.94291338582677	0	-1	797.489361702128	0	12.3571428571429	-1	-1	0	-1	1.09471428571429	-1	15899.147766323	0	-1	-1	0	7.20192307692308	121.666666666667	0	-1	0	0	0	40.1923076923077	0	-1	-1	0.209677419354839	-1	-1	0	1.41304347826087	0	19.5865384615385	-1	0	-1	7147.9226519337	-1	4.8	1.21794871794872	3.12658227848101	4.02777777777778	0.857142857142857	-1	-1	-1	-1
2012_21	9.46619217081851	0	-1	0	0	0	-1	-1	-1	-1	0.756954545454545	-1	9129.03667481663	0	-1	-1	-1	7.14893617021277	101.590909090909	0	-1	0	1206.16666666667	-1	101.41935483871	-1	-1	-1	0.0961538461538462	-1	-1	0	-1	0	-1	-1	-1	-1	11081.0838709677	-1	1.36842105263158	3.07317073170732	0	14.5641025641026	0	-1	-1	-1	-1
2012_22	8.70796460176991	0	-1	0	0	51.2	-1	-1	0	-1	0.489798145117294	-1	12742.037037037	-1	-1	-1	-1	16.1344537815126	130.636363636364	0	-1	0	0	0	122.352941176471	-1	-1	-1	0	-1	-1	0	1.88372093023256	-1	-1	-1	-1	-1	4742.1387283237	-1	1.63636363636364	2.34586466165414	0	19.6	0	-1	-1	-1	-1
2012_23	27.6706689536878	0	-1	0	-1	0	-1	-1	0	-1	0.586553273427471	-1	11339.7413793103	-1	-1	-1	-1	12	-1	0	-1	0	2867	0	96.6428571428571	-1	-1	-1	0.0434782608695652	-1	-1	0	1.30769230769231	0	-1	-1	-1	-1	15524.2216216216	-1	0	3.02222222222222	0	24.5217391304348	2.28169014084507	-1	-1	-1	-1
2012_24	43.6412698412698	0	-1	0	-1	0	-1	-1	0	-1	0.210411805078929	-1	9785.02681992337	-1	-1	-1	-1	12	-1	0	-1	-1	0	0	44.8888888888889	-1	-1	-1	0	-1	-1	0	0.37037037037037	0	-1	-1	-1	-1	13790.6802721088	-1	1.58823529411765	8.02745098039216	-1	36.6666666666667	2.4	-1	-1	-1	-1
2012_25	26.634382566586	0	-1	1058.54166666667	-1	0	-1	-1	0	-1	0.116735366859027	-1	8659.95652173913	-1	-1	-1	-1	19	-1	-1	-1	0	0	0	162.838709677419	-1	-1	-1	0.0657894736842105	-1	-1	0	-1	-1	-1	-1	-1	-1	5402.44137931034	-1	0	23.046875	-1	38.9189189189189	3.35714285714286	-1	-1	-1	0
2012_26	74.9554565701559	0	-1	0	-1	0	-1	-1	0	-1	0.167266244057052	-1	7296.29577464789	-1	-1	-1	-1	15.3409090909091	0	-1	-1	0	0	-1	174.666666666667	-1	-1	-1	0.13953488372093	-1	-1	0	-1	0	-1	-1	-1	-1	4323.7225433526	-1	0	33.378590078329	-1	13.5	0	-1	-1	-1	-1
2012_27	127.288629737609	0	-1	0	-1	0	-1	-1	-1	-1	0.0957440758293839	-1	2963.35371179039	-1	-1	-1	-1	16.1818181818182	-1	-1	-1	0	0	0	0	-1	-1	-1	0.195652173913043	-1	-1	0	-1	-1	-1	-1	-1	-1	11248.8484848485	-1	0	50.5500821018062	0	0	0	-1	-1	-1	0
2012_28	123.03386167147	0	-1	0	-1	33.3913043478261	-1	-1	0	-1	0.0370510396975425	-1	3105.14754098361	-1	-1	-1	-1	19.7102803738318	0	-1	-1	0	0	-1	276.8	-1	-1	-1	0	-1	-1	-1	-1	0	-1	-1	-1	-1	8807.86046511628	-1	0	87.0475138121547	-1	0	0	-1	-1	-1	-1
2012_29	141.714837712519	0	-1	0	-1	84.5	-1	-1	0	-1	0.0935835567470956	-1	1586.02793296089	-1	-1	-1	-1	13.5591397849462	-1	-1	-1	0	0	0	295.714285714286	-1	-1	-1	0.0449438202247191	-1	-1	0	-1	0	-1	-1	-1	-1	6994.11764705882	-1	0	87.1994301994302	-1	19.1304347826087	0	-1	-1	-1	-1
2012_30	165.242549668874	0	-1	0	-1	25.2307692307692	-1	-1	0	-1	0.0398001998001998	-1	668.339869281046	-1	-1	-1	-1	8.1038961038961	0	0	-1	0	0	-1	93.4375	-1	-1	-1	0.0476190476190476	-1	-1	-1	-1	0	-1	-1	-1	-1	6060.43243243243	-1	0	393	0	0	0	-1	-1	-1	-1
2012_31	143.559969442322	0	-1	0	-1	177.954545454545	-1	-1	0	-1	0.0145714285714286	-1	1050.90810810811	-1	-1	-1	-1	6.27586206896552	-1	0	-1	0	0	0	0	-1	-1	-1	0	-1	-1	0	-1	-1	-1	-1	-1	-1	15138.5321100917	-1	0	542	-1	17.3333333333333	0	-1	-1	-1	-1
2012_32	155.262987012987	0	-1	0	-1	201.530612244898	-1	-1	0	-1	0.026046277665996	-1	3792.57558139535	-1	-1	-1	-1	1.04	0	0	-1	0	4075	-1	0	-1	-1	-1	0.0615384615384615	-1	-1	0	0.872727272727273	-1	-1	-1	-1	-1	338.936170212766	-1	0	154.027290448343	0	10.9	0	-1	-1	-1	-1
2012_33	145.034246575342	0	-1	0	-1	158.387096774194	-1	-1	-1	-1	0.00662373505059798	-1	3134.75968992248	-1	-1	-1	-1	2.12345679012346	-1	0	-1	0	0	0	58	-1	-1	-1	0	-1	-1	-1	2.7906976744186	-1	-1	-1	-1	-1	13568.6868686869	-1	1.27272727272727	128.602230483271	0	0	0	-1	-1	-1	-1
2012_34	95.9898648648649	0	-1	0	-1	235.028571428571	-1	-1	0	-1	0.0258968609865471	-1	4627.95652173913	-1	-1	-1	-1	1.05405405405405	0	0	-1	0	1914	0	109.714285714286	-1	-1	-1	0	-1	-1	0	10.7692307692308	-1	-1	-1	-1	-1	7841.10447761194	-1	0.666666666666667	120.219451371571	0	-1	0	-1	-1	-1	-1
2012_35	95.6196581196581	0	-1	0	3.5	7.3125	-1	-1	-1	-1	0.0581347150259067	-1	4054.04812834225	-1	-1	-1	-1	3.04615384615385	-1	0	-1	0	0	-1	71.2972972972973	-1	-1	-1	0.0307692307692308	-1	-1	0	7.60869565217391	0	-1	-1	-1	-1	18071.0060240964	-1	0	68.7826086956522	-1	-1	0.875	-1	-1	-1	-1
2012_36	37.2321428571429	0	-1	0	-1	17.695652173913	-1	-1	-1	-1	0.0351566696508505	-1	3387.46987951807	-1	-1	-1	-1	4.92063492063492	23.1764705882353	0	-1	0	0	-1	72.3928571428571	-1	-1	-1	0	-1	-1	0	6.90909090909091	0	-1	-1	-1	-1	30458.8235294118	-1	0	30.7976878612717	0	9.2	0.846153846153846	-1	-1	-1	-1
2012_37	26.4485294117647	0	-1	0	-1	11.1	-1	-1	-1	-1	0.0262137531068766	-1	6162.34013605442	-1	-1	-1	-1	1.72151898734177	-1	0	-1	0	0	0	0	-1	-1	-1	0	-1	-1	0	5.8695652173913	-1	-1	-1	-1	-1	29355.3038674033	-1	0	33.8754098360656	0	18	4.44444444444444	-1	-1	-1	-1
2012_38	24.2068965517241	0	-1	0	-1	9.14285714285714	-1	-1	-1	-1	0.0680294117647059	-1	779.633333333333	-1	-1	-1	-1	1	0	0	-1	0	0	-1	0	-1	-1	-1	0	-1	-1	0	3.92	-1	-1	-1	-1	-1	50661.8681318681	0	0.80952380952381	21.0965517241379	0	0	5.6504854368932	-1	-1	-1	-1
2012_39	8.97841726618705	0	-1	0	-1	32.5	-1	-1	-1	-1	0.0326198292843073	-1	964.774193548387	-1	-1	-1	-1	4.18461538461538	-1	0	-1	0	2406	0	0	-1	-1	-1	0	-1	-1	-1	3.33333333333333	-1	-1	-1	-1	-1	43352.6021505376	0	0	-1	-1	0	2.84210526315789	-1	-1	-1	-1
2012_40	5.31645569620253	0	-1	0	0	140.192307692308	-1	-1	-1	-1	0.0898989898989899	-1	5195.13669064748	0	-1	0	0.248322147651007	4.12121212121212	0	0	4.92877225866917	0	0	0	0	0	0	-1	0	-1	-1	0	3	0	19.0655737704918	0	-1	-1	75744.6425339367	174.363636363636	0.725	-1	0.847980997624703	0	4.20634920634921	-1	-1	0	0
2012_41	2.94666666666667	0	-1	0	0	56.25	-1	-1	0	-1	-1	-1	2906.24369747899	-1	-1	141.473684210526	0	1.02040816326531	0	0	14.1375661375661	0	0	0	53.2881355932203	0	0	-1	0.0982142857142857	0	-1	0	5.5	0	0	0	-1	-1	80732.1255605381	0	0	-1	1.57073170731707	10.5925925925926	1.54545454545455	-1	-1	54.8636363636364	0
2012_42	1.57366071428571	0	-1	0	0	111.243243243243	-1	-1	0	-1	0.173689320388349	-1	1830.8255033557	0	-1	-1	0.316901408450704	1.04166666666667	0	0	32.6383347788378	0	0	0	71.3333333333333	0	0.666666666666667	-1	0.15	0	-1	0	5.73529411764706	0	0	0	0	-1	85407.2835820896	116.75	0	-1	2.71493212669683	23.5454545454545	0	-1	-1	131.657142857143	0
2012_43	0.898395721925134	0	-1	0	0	12.875	-1	-1	-1	-1	0.25089058524173	-1	6092.08955223881	-1	-1	61.4375	0.352112676056338	0	0	0	26.6189047261815	0	803.636363636364	0	154.315789473684	0	0	-1	0	0	-1	0	5.09756097560976	0	0	-1	0	-1	122960.315151515	0	3.51515151515152	-1	4.73092369477912	22.7142857142857	0.769230769230769	-1	-1	0	0
2012_44	0.47239263803681	0	-1	0	0	12.1538461538462	-1	-1	0	-1	0.553171608265948	-1	6662.89156626506	-1	-1	0	1.33333333333333	0	0	0	22.890520694259	0	313.722222222222	0	208.071428571429	0	0	-1	0	4.18487394957983	-1	0	-1	0	0	0	0	-1	122238.713826367	81.0909090909091	1.95238095238095	-1	5.24293785310734	-1	1.5	-1	-1	0	0.0588235294117647
2012_45	2.42191780821918	16.6521739130435	-1	0	5.11764705882353	22	-1	-1	0	-1	0.969179706021811	-1	10105.7021276596	0	-1	182.833333333333	4.16748768472906	0	0	0	51.3004005340454	0	601.822222222222	0	346.033333333333	0	0	-1	0	12.9777777777778	-1	0	-1	0	0	0	0	-1	165233.746397695	65.1176470588235	1.25581395348837	-1	7.15577889447236	18.6792452830189	1.6	-1	-1	32.4444444444444	0
2012_46	1.65714285714286	0	-1	0	0	11.125	-1	-1	0	-1	1.30383419689119	-1	6299.94078947368	0	-1	180.6	2.51162790697674	0	50.3220338983051	0	32.0598290598291	0	468.551724137931	0	415.454545454545	0	0	-1	0.0833333333333333	4.44067796610169	26.1538461538462	0	-1	0	0	0	16.1428571428571	-1	176147.072072072	148.090909090909	1.1875	-1	7.98415841584158	40.8	2.07692307692308	-1	-1	30	0
2012_47	0.354570637119114	0	-1	0	6.76923076923077	-1	-1	-1	0	-1	2.47346140533056	-1	7890.11965811966	0	-1	0	1.61057692307692	3	187.471698113208	0	55.0562874251497	0	564.961538461538	0	270.923076923077	0	0.296296296296296	-1	0.273972602739726	3.91489361702128	14.962962962963	0	-1	0	0	0	0	-1	180391.039325843	223.454545454545	1.96825396825397	-1	9.08041958041958	77.9512195121951	1.33333333333333	-1	-1	29.2666666666667	0.027027027027027
2012_48	0.978328173374613	0	-1	0	3.23076923076923	10.7777777777778	-1	-1	0	-1	4.7793338978267	-1	9875.63076923077	0	-1	-1	6.78606965174129	1.95604395604396	350.671232876712	0	64.0058479532164	19.5	989.727272727273	0	330.9	0	0	-1	0.180790960451977	0	79.1842105263158	0	-1	373.25	10.6632653061224	0	0	-1	178212.934615385	270.176470588235	1.25252525252525	-1	8.4629294755877	30.0444444444444	2.42307692307692	-1	-1	0	0
2012_49	1.32692307692308	40.21875	-1	0	20.5714285714286	16.8	-1	-1	0	-1	5.49538428042674	-1	7825.82178217822	0	-1	0	9.38461538461539	3.1046511627907	168.101265822785	-1	201.446269982238	4.4	1676.7032967033	0	275.675675675676	0	0	-1	1.77339901477832	10.2980769230769	17.6153846153846	0	-1	0	33.7363636363636	0	20	-1	203943.384615385	604.838709677419	2.64963503649635	-1	15.2657580919932	95.15625	5.18181818181818	-1	-1	33.5	0.130434782608696
2012_50	0.408163265306122	17.9090909090909	-1	628.052083333333	48.5333333333333	6.14285714285714	-1	-1	0	-1	9.16553390239974	-1	1091.66315789474	0.666666666666667	-1	429.4	28.858024691358	1.4	61.7142857142857	-1	338.839936608558	0	4189.88764044944	4.66666666666667	127.111111111111	0	0.448275862068966	-1	6.38793103448276	28.5051546391753	142.869565217391	0	-1	693.076923076923	10.9158878504673	0	76.6315789473684	-1	243183.640569395	1612.96428571429	3.81818181818182	-1	88.547062539482	58.6813186813187	4.84848484848485	-1	-1	164.307692307692	0
2012_51	0.950570342205323	11.5862068965517	-1	0	54.5789473684211	1.66666666666667	-1	-1	0	-1	6.05551426101988	-1	8925.02564102564	0.0833333333333333	-1	1400.18181818182	66.6410256410256	4.09090909090909	237.333333333333	-1	516.023247366509	0	5180.32183908046	0	-1	57.7	0	-1	15.0619834710744	13.840490797546	131.102941176471	255.837837837838	-1	583.454545454545	83.265306122449	0	96.1176470588235	-1	181945.191489362	0	6.96969696969697	-1	174.378770301624	29	8	-1	-1	222.64	1.27272727272727
2012_52	0.305825242718447	3.5	-1	0	94.6666666666667	0.166666666666667	-1	-1	0	-1	21.16875	-1	5892.75	4.43181818181818	-1	2198	103.714057507987	8.07228915662651	188.474576271186	-1	606.571982925883	14.125	3527.88461538462	1.625	-1	0	9.72222222222222	-1	19.9808612440191	45.6	421.5	0	-1	0	67.7941176470588	54	2.85714285714286	-1	144495.619047619	829.15	12.8832684824903	-1	88.8904109589041	44.327868852459	3.73333333333333	-1	-1	412.992	0
2013_01	2.03726708074534	12.7173913043478	-1	0	176.324324324324	29.6666666666667	-1	-1	0	-1	19.5499130585985	-1	2847.27272727273	14.1538461538462	0.142857142857143	2294.58823529412	200.743301642178	1.85321100917431	-1	7	721.383363471971	22.5	4035.50724637681	5.22222222222222	114.428571428571	153.947368421053	20.377358490566	-1	38.0126582278481	156.212121212121	924.631578947368	694.514285714286	-1	775.6	139.016666666667	169.272727272727	24.5454545454545	-1	105870.342618384	829.142857142857	24.3014184397163	-1	481.951710261569	-1	17.1428571428571	-1	-1	1672.54416961131	0.257142857142857
2013_02	3.69473684210526	62.4516129032258	-1	3750.86956521739	210.5	5.83333333333333	-1	-1	0	-1	16.6915791201576	-1	4655.46728971963	5.15254237288136	0	3057.84390243902	109.042553191489	9	225.227272727273	5.75	1130.00706713781	10.56	9066.43703703704	20.9230769230769	46.0384615384615	88.0869565217391	52.6363636363636	-1	34.2172523961661	298.668032786885	952.916666666667	2524.66386554622	-1	949.538461538462	124.558823529412	375.294117647059	72.8297872340426	-1	166318.456431535	612.888888888889	39.2452830188679	-1	629.361556476311	23.25	3.90243902439024	-1	-1	2389.91449426486	0.684210526315789
2013_03	5.78723404255319	124.235294117647	-1	1727.37037037037	388.970588235294	3.5	-1	-1	889.25	-1	12.3246703506098	-1	12299.1403508772	32.9210526315789	0.923076923076923	4450.50234741784	95.9421965317919	6.10344827586207	627.817391304348	23.4285714285714	1453.92633773454	19.2	9884.8	33.7142857142857	351	263.8	80.7326732673267	-1	26.7986577181208	778.70479704797	1614.02247191011	4253.38709677419	-1	0	280.459770114943	1279.05263157895	92.5	-1	182270.967032967	1514.4347826087	36.791519434629	-1	448.203299627461	29.9156626506024	4	-1	-1	2682.78314491264	3.32432432432432
2013_04	4.43548387096774	181.622222222222	-1	7862.51162790698	626.834645669291	1.36363636363636	-1	-1	452.307692307692	-1	9.13005337665352	-1	2983.56	129.496402877698	0	5647.22222222222	148.206047032475	7.20588235294118	1165.82872928177	13.9487179487179	2507.49360613811	37.6875	13910.4255319149	74.7540983606557	73.5714285714286	304.791666666667	112.081081081081	-1	19.972027972028	1473.41044776119	2657.04498269896	6955.92682926829	-1	1010	852.367549668874	5859.62043795621	93.5454545454545	-1	244286.446130501	1508.25	-1	-1	407.02538071066	12.8275862068966	5.54716981132075	-1	-1	2216.70716112532	5.34545454545455
2013_05	3.47979797979798	243.221476510067	-1	22683.5820895522	927.142857142857	1.33333333333333	-1	-1	1290.77611940299	-1	9.68143940457801	-1	915.078431372549	158.470588235294	3.45	8095.21126760563	221.180698151951	5.0462962962963	2130.25	34.1917808219178	3509.54512448133	88.4	18143.0696202532	130.730158730159	173.260869565217	709.661971830986	78.8450704225352	-1	53.0992366412214	1648.0303030303	4897.16310160428	6700.6835443038	-1	1548.16666666667	861.333333333333	10139.0295857988	126.346456692913	-1	210409.054054054	1027	96.104513064133	-1	375.525525525526	17.8118811881188	8.61538461538461	-1	-1	1231.91699604743	6.17142857142857
2013_06	5.33333333333333	333.25	-1	20624.3607843137	978.468253968254	1	-1	-1	1679.49382716049	-1	7.17101706484642	-1	6096.28205128205	502.085561497326	5.5	7493.59302325581	191.106010928962	7.92079207920792	2814.896	21.2121212121212	3410.35467745775	89.1090909090909	18240.5480769231	65.75	171.111111111111	892.632911392405	53.9	-1	50.8173076923077	1420.04535147392	5038.3746701847	5993.84438040346	-1	2096	855.530726256983	8617.15909090909	-1	-1	147771.166666667	1524	96.2702702702703	-1	442.400291120815	22.9090909090909	2.46464646464646	-1	-1	1194.93796526055	6.77777777777778
2013_07	4.82325581395349	258.296846011132	-1	14513.6028169014	663.88679245283	3.25	-1	-1	2098.40350877193	-1	5.9745027124774	-1	1865.73770491803	870.841121495327	1.94285714285714	5551.22580645161	154.178389398573	11	3146.33333333333	73.271186440678	3150.29485714286	110.285714285714	16949.1347517731	101.820754716981	93	1600	101.785714285714	-1	25.7254901960784	913.663793103448	4719.18629550321	10948.4033613445	-1	1114.5	696.606118546845	3122.16470588235	44.7945205479452	-1	143617.924528302	1591.33333333333	86.8398058252427	-1	622.433367243133	11.5862068965517	7.76470588235294	-1	-1	562.12927756654	7.4066985645933
2013_08	2.72	250.819960861057	-1	10202.4	480.681818181818	0	-1	-1	2148.71794871795	-1	4.40452264150943	-1	1849.14893617021	1167.18777292576	3.45882352941176	4613.05517241379	122.108626198083	12.1061946902655	2509.89898989899	57.3333333333333	2105.14243687178	77.28	18765.059602649	115.588652482269	0	3592.10714285714	130.508474576271	-1	26.7908309455587	604.310991957105	5020.97894736842	13443.1955835962	-1	1078	605.476014760148	1690.85714285714	126	-1	162506.840085288	861	91.2538860103627	-1	261.345387453875	12.0634920634921	4.86111111111111	-1	-1	830.353846153846	11.8095238095238
2013_09	4.94656488549618	323.568710359408	-1	10701.6666666667	464.494382022472	0	-1	-1	2360.5	-1	3.43574496644295	-1	4775.07438016529	1211.90082644628	4.45238095238095	3323.79807692308	83.5194346289753	9.08910891089109	1503.25174825175	47.38	1445.95752895753	61.6666666666667	13936.2277580071	83.0230769230769	83.7631578947368	3780.72340425532	50.8604651162791	-1	26.7	332.48031496063	4192.80626780627	9738.34185303514	-1	0	707	1204.375	88.5769230769231	-1	154834.181069959	797.142857142857	94.4971098265896	-1	211.144827586207	31.4285714285714	6.60869565217391	-1	-1	1105.775	11.1827586206897
2013_10	3.49090909090909	211.428571428571	-1	7819.52083333333	344.714285714286	5.14285714285714	-1	-1	1467.45	-1	3.9927520316275	-1	2866.02684563758	3807.09623430962	1.75	2305.45454545455	92.6754772393539	15.2586206896552	1764.49655172414	60	1071.02452316076	70	12557.2594142259	95.6785714285714	31.2702702702703	2613.33333333333	19.875	-1	18.8032786885246	219.615671641791	2696.5	6202.12987012987	-1	652.5	739.089108910891	839.285714285714	69.8076923076923	-1	204066.025641026	867.428571428571	82.3189964157706	-1	154.664916885389	11.6666666666667	2.40384615384615	-1	-1	855.616666666667	16.8421052631579
2013_11	5.55882352941177	207.206422018349	-1	5258.98089171975	175.241379310345	2	-1	-1	1753.85507246377	-1	2.96106452422797	-1	8092.23333333333	4526.37572254335	1.85542168674699	2217.41379310345	70.5182608695652	16	1534.55042016807	27.75	776.740176423416	106.083333333333	11286.1971830986	67.0588235294118	79.8620689655172	-1	57.5	-1	13.8626373626374	92.6923076923077	1395.30769230769	6709.31092436975	-1	0	652.850111856823	979.222222222222	44.1428571428571	-1	165492.602739726	0	43.3333333333333	-1	114.017551963049	6.93103448275862	10.3690476190476	-1	-1	876.098039215686	11.9016393442623
2013_12	7.23795180722892	136.137931034483	-1	10527.0588235294	108.529411764706	0.5	-1	-1	955.25	-1	1.48310776942356	-1	9738.15254237288	3598.01369863014	1.32352941176471	2308.86206896552	44.5081632653061	23.1900826446281	1875.76271186441	25	472.274902131361	70	8810.45454545455	50.7906976744186	53.35	1091.41791044776	41.4634146341463	-1	9.7910447761194	32.7307692307692	715.622568093385	4268.58638743456	-1	0	772.063492063492	1165.21875	18.4736842105263	-1	86903.5571955719	0	46.978021978022	-1	95.9362677670793	13.6153846153846	1.72463768115942	-1	-1	660.892857142857	2.52439024390244
2013_13	2.92307692307692	112.856382978723	-1	7697.4	53.1612903225806	0.111111111111111	-1	-1	1153.48648648649	-1	3.66358506224066	-1	12367.8217821782	1158.51851851852	0.486486486486487	825.555555555556	16.3035714285714	35.5692307692308	1167.19858156028	14.5454545454545	308.63229879011	71.4	7566.81818181818	54.6	0	539.714285714286	12.5	-1	16.2292263610315	6.15436241610738	378.442307692308	1429.35294117647	-1	0	183.525925925926	1021.73076923077	-1	-1	42068.9536082474	251.6	49.8275862068965	-1	26.7238169123351	12.9850746268657	3.25423728813559	-1	-1	680.521739130435	0
2013_14	3.125	28.7692307692308	-1	11498.7419354839	37.5	0.8	-1	-1	568.705882352941	-1	2.55069153069153	-1	12595.8323353293	885.756097560976	1.21518987341772	1024.9756097561	16.9156626506024	32.5479452054795	816.15	4.2	185.473282442748	110	5717.44680851064	90.0576923076923	0	596.75	15	-1	10.1340482573727	5.6328125	202.978723404255	927.312	-1	-1	730.996587030717	975.625	1.7	-1	52010.0594059406	0	33.5135135135135	-1	30.4637491835402	11.52	5.76470588235294	-1	-1	582.664122137405	1.60714285714286
2013_15	1.46258503401361	15.1942446043165	-1	8995.53488372093	25.8461538461538	0	-1	-1	430.911764705882	-1	2.20204367301232	-1	16434.24	390.415841584158	3.04838709677419	1546.27659574468	10.2005730659026	33.8079096045198	854.824427480916	1.66666666666667	196.872427983539	175	5477.18987341772	21.6216216216216	0	449.590909090909	12.3913043478261	-1	18.4309764309764	12.0630630630631	40.1333333333333	1131.29032258065	-1	0	453.125	629.176470588235	23.8235294117647	-1	38257.7302904564	0	37.5126050420168	-1	35.8777506112469	11.5076923076923	2.4	-1	-1	344.614035087719	0.620689655172414
2013_16	1.53623188405797	0	-1	8171.05555555556	9.33333333333333	0	-1	-1	721.666666666667	-1	1.86713107762297	-1	20833.9120879121	119.333333333333	9.23684210526316	747.142857142857	4.60089686098655	22.225641025641	256.224489795918	2	27.9755884917175	74.5454545454545	4077.46808510638	21.1666666666667	0	104	1.89285714285714	-1	3.31927710843373	5.73333333333333	10.7735849056604	0	-1	-1	301.223744292237	301.538461538462	0	-1	31417.7488151659	0	32.0526315789474	-1	28.7839046199702	0	2.28169014084507	-1	-1	147.344262295082	0.257142857142857
2013_17	0.382352941176471	0	-1	4803.05454545455	0	0	-1	-1	228	-1	0.577065797273266	-1	17866.6403940887	111.923076923077	4.27777777777778	461.565217391304	1.25714285714286	17	111.66	0	-1	54	1993.46153846154	6.71428571428571	40.0454545454545	175.8	8.88888888888889	-1	1.78125	-1	5.68571428571429	0	-1	0	133.297872340426	160	7	-1	43494.3586956522	0	5.95833333333333	-1	8.50073637702504	0	3.66666666666667	-1	-1	72.4285714285714	0
2013_18	0.191919191919192	0	-1	3076	0	0	-1	-1	755	-1	1.59010349288486	-1	28549.125	14.7142857142857	13.5757575757576	-1	0.568627450980392	17	122.68	0.222222222222222	-1	83.3333333333333	858	4.75	131.428571428571	0	3.11111111111111	-1	0.898373983739837	-1	-1	827.714285714286	-1	0	115.031578947368	60	0	-1	34525.7382198953	0	6.05263157894737	3.80645161290323	5.02413793103448	182	3.52380952380952	-1	-1	0	0
2013_19	0.902777777777778	-1	-1	3221.64705882353	0	0	-1	-1	916	-1	1.35088598130841	-1	42068.6588235294	-1	10.4854368932039	-1	0.357142857142857	11	51	0	-1	52	1316.72727272727	1.8	0	0	5.75	-1	0.381818181818182	-1	-1	0	-1	0	25.1785714285714	36.75	0	-1	25046.1315789474	0	4.44444444444444	1.73154362416107	5.0643330179754	7.71428571428571	3.06666666666667	-1	-1	46.1764705882353	0
2013_20	1.55017301038062	-1	-1	1006.26923076923	0	0	-1	-1	0	-1	0.870647571606476	-1	30551.2	-1	7.3972602739726	-1	0.0421686746987952	8.04123711340206	0	0	-1	48.8461538461538	0	2.41176470588235	0	0	1.375	-1	0.0465116279069767	-1	-1	0	-1	0	32.2666666666667	3.75	0	-1	18755.1506024096	0	3	3.76744186046512	1.50564617314931	9.52631578947368	0.947368421052632	-1	-1	0	0
2013_21	2.06185567010309	-1	-1	-1	0	0	-1	-1	808.666666666667	-1	0.568911099421357	-1	18456.1057692308	-1	11.4	-1	-1	8	-1	0	-1	0	0	2	0	-1	0.454545454545455	-1	0.115606936416185	-1	-1	0	-1	0	-1	0	-1	-1	21209.2971428571	0	4	2.19354838709677	-1	-1	0	-1	-1	65.7916666666667	0
2013_22	1.19186046511628	-1	-1	-1	0	0	-1	-1	0	-1	0.587429149797571	-1	23136.7823343849	-1	22.3783783783784	-1	-1	3	0	-1	-1	20	0	0	0	-1	0	-1	0.0355029585798817	-1	-1	0	-1	-1	-1	0	-1	-1	12715.5629139073	0	0	6.39306358381503	-1	1.25409836065574	2.73529411764706	-1	-1	44.7692307692308	0
2013_23	3.75460122699387	-1	-1	-1	-1	-1	-1	-1	-1	-1	0.494792865362486	-1	23516.9696969697	-1	31.5789473684211	-1	-1	9.83957219251337	0	0	-1	0	0	0	0	-1	0	-1	0.00869565217391304	-1	-1	0	-1	-1	-1	0	-1	-1	26746.2962962963	0	1.0952380952381	6.23762376237624	-1	0	0.545454545454545	-1	-1	-1	-1
2013_24	2.1875	-1	-1	-1	-1	44.48	-1	-1	0	-1	0.177093596059113	-1	22861.9088669951	-1	25.6688741721854	-1	-1	10.9408602150538	0	-1	-1	0	0	8	0	-1	1.25	-1	0	-1	-1	0	-1	0	-1	-1	-1	-1	30055.5189873418	0	2.35294117647059	5.2	-1	2.68253968253968	0	-1	-1	49.5357142857143	0
2013_25	2.08955223880597	-1	-1	-1	-1	-1	-1	-1	-1	-1	0.117707509881423	-1	20172.1333333333	-1	28.8139534883721	-1	-1	15.4782608695652	0	-1	-1	0	806.5	0	0	-1	0	-1	0.0155038759689922	-1	-1	0	-1	-1	-1	0	-1	-1	56278.5882352941	-1	0	7.78761061946903	-1	8.43010752688172	1.45454545454545	-1	-1	0	-1
2013_26	2.97368421052632	-1	-1	-1	-1	54	-1	-1	-1	-1	0.143225806451613	-1	29576.4510309278	-1	19.4736842105263	610	-1	5.91836734693878	0	-1	-1	0	0	0	96.1081081081081	-1	-1	-1	0	-1	-1	0	-1	-1	-1	0	-1	-1	43296.736196319	0	0	12.1120331950207	-1	6.28	0	-1	-1	0	-1
2013_27	8.49559471365639	0	-1	-1	-1	0	-1	-1	0	-1	0.103830275229358	-1	11737.5180412371	-1	42.046511627907	405	-1	5.10135135135135	0	-1	-1	0	0	0	29.4545454545455	-1	-1	-1	0	-1	-1	0	-1	0	-1	-1	-1	-1	76108.8837209302	0	0	10.5238095238095	-1	6.93548387096774	0	-1	-1	0	-1
2013_28	13.4117647058824	0	-1	-1	3	26.5	-1	-1	-1	-1	0.0971052631578947	-1	10953.6394849785	-1	19.6785714285714	-1	-1	22.1353383458647	0	-1	-1	0	0	0	0	-1	-1	-1	0	-1	-1	0	-1	-1	-1	-1	-1	-1	63529.2391304348	-1	0	11.2538461538462	-1	14	0	-1	-1	0	0
2013_29	22.4440078585462	0	-1	-1	-1	57.0769230769231	-1	-1	-1	-1	0.114499605988968	-1	19952.0295698925	-1	6.36363636363636	-1	-1	58.253164556962	0	-1	-1	0	0	0	0	-1	-1	-1	0	-1	-1	-1	-1	0	-1	-1	-1	-1	50926.1581395349	-1	1.28571428571429	33.4115384615385	-1	8.29850746268657	0	-1	-1	0	-1
2013_30	14.4767441860465	0	-1	-1	-1	60	-1	-1	0	-1	0.0177502214348981	-1	10343.7190082645	-1	13.0666666666667	-1	-1	51.75	0	-1	-1	0	0	-1	0	-1	-1	-1	0	-1	-1	0	-1	-1	-1	-1	-1	-1	43206.8393782383	-1	0	51.1362126245847	-1	3.51428571428571	0	-1	-1	0	-1
2013_31	30.6	0	-1	-1	-1	0	-1	-1	0	-1	0.0133054393305439	-1	17538.25	-1	7.42682926829268	-1	-1	67.9293286219081	0	-1	-1	0	-1	0	0	-1	-1	-1	0	-1	-1	-1	-1	-1	-1	-1	-1	-1	32254.085106383	-1	0	42.7118644067797	-1	10.4411764705882	0	-1	-1	0	0
2013_32	32.8516579406632	0	-1	-1	0	128.076923076923	-1	-1	-1	-1	0.0365399239543726	-1	10950.3870967742	-1	15.3333333333333	-1	-1	81.9444444444444	0	-1	-1	0	-1	0	39.1714285714286	-1	-1	-1	0	-1	-1	0	-1	-1	-1	-1	-1	-1	38788.2488479263	-1	0	-1	0	0	0	-1	-1	0	-1
2013_33	40.0247524752475	0	-1	-1	-1	132.4	-1	-1	-1	-1	0.0645814167433303	-1	10533.4782608696	-1	6.37974683544304	-1	-1	62.751968503937	0	-1	-1	0	0	-1	59.7391304347826	-1	-1	-1	0	-1	-1	0	-1	-1	-1	0	-1	-1	63930.1764705882	0	0	70.5329512893983	0	21.7887323943662	0	-1	-1	0	-1
2013_34	39.8386167146974	0	-1	-1	-1	37.2	-1	-1	-1	-1	0.0560384615384615	-1	8762.91666666667	-1	4.72972972972973	-1	-1	61.9322033898305	0	0	0	0	0	0	44.5	-1	-1	-1	0	-1	-1	0	-1	-1	-1	-1	-1	-1	42946.1632653061	0	1.77777777777778	53.1827242524917	-1	9.14285714285714	1	-1	-1	34.7857142857143	-1
2013_35	44.6083333333333	0	-1	-1	-1	0	-1	-1	-1	-1	0.0674956369982548	-1	6045.72413793103	-1	7.58974358974359	-1	-1	41.5196078431373	0	-1	0	0	0	0	35.3409090909091	-1	-1	-1	0	-1	-1	0	-1	0	-1	-1	-1	-1	43307.3571428571	0	0.769230769230769	118.86684073107	-1	12.6285714285714	1.86666666666667	-1	-1	0	-1
2013_36	37.656121045392	0	-1	-1	-1	30.5	-1	-1	-1	-1	0.0410204081632653	-1	5147.2	-1	4.44915254237288	-1	-1	37.7918552036199	0	0	-1	0	0	0	156.545454545455	-1	-1	-1	0.0380952380952381	-1	-1	0	-1	-1	-1	-1	-1	-1	40775.4206896552	0	0	162.426470588235	-1	3.11267605633803	2.41935483870968	-1	-1	0	-1
2013_37	47.4576271186441	0	-1	-1	-1	12.2307692307692	-1	-1	-1	-1	0.0342857142857143	-1	4990.76712328767	-1	0.968421052631579	-1	-1	35.9753086419753	0	0	-1	0	0	0	170.739130434783	-1	-1	-1	0	-1	-1	0	-1	-1	-1	-1	-1	-1	47137.0848708487	-1	0	106.463414634146	-1	0	1.14285714285714	-1	-1	61.8461538461538	-1
2013_38	33.0520393811533	0	-1	-1	0	0	-1	-1	-1	-1	0.0431354748603352	-1	3775.87878787879	-1	4.19310344827586	-1	-1	25.6645161290323	0	0	9.55323819978046	0	0	0	210.576923076923	-1	-1	-1	0	-1	-1	0	-1	-1	-1	-1	-1	-1	59279.2372881356	0	0	-1	-1	6.28205128205128	2.46153846153846	-1	-1	0	0
2013_39	39.1320474777448	0	-1	-1	-1	0	-1	-1	-1	-1	0.0431523642732049	-1	1426.37125748503	-1	3.63243243243243	-1	-1	19.2708333333333	0	0	7.65633802816901	0	0	0	581.942857142857	-1	-1	-1	0.12396694214876	-1	-1	0	-1	-1	-1	0	-1	-1	76849.2370572207	-1	0	77.2960199004975	-1	4.20689655172414	0	-1	-1	0	0
2013_40	21.4625468164794	0	-1	0	6.66666666666667	0	-1	-1	0	-1	0.0942393069842989	-1	2075.32743362832	0	4.5125	-1	0.523809523809524	9.65648854961832	0	0	0	0	0	0	433.972222222222	0	0	-1	0.0625	-1	-1	0	-1	0	0	-1	0	-1	90209.5867768595	-1	0	81.2970297029703	-1	0	0.46875	-1	-1	0	0
2013_41	16.81640625	0	-1	0	0	0	-1	-1	0	-1	0.0804239917269907	-1	3059.18691588785	-1	3.96774193548387	-1	0.224719101123595	10.3783783783784	0	0.4	4.12488605287147	0	0	0	746.068181818182	0	0	-1	0	0	-1	0	-1	0	0	-1	0	-1	72223.0303030303	-1	5.47368421052632	46.9553264604811	-1	10.6779661016949	3.4	-1	-1	79.6	0
2013_42	4.07692307692308	0	-1	0	0	9.78571428571428	-1	-1	0	-1	0.0384026622296173	-1	1368.31081081081	0	4.40944881889764	-1	0.467065868263473	11.5257731958763	0	0.0769230769230769	6.69784706755754	0	344.641025641026	0	459.466666666667	0	0	-1	0	6.95454545454546	-1	0	-1	0	0	-1	0	-1	46536.4745762712	-1	2.4	23.1231671554252	-1	7.66666666666667	0	-1	-1	0	0
2013_43	6.71074380165289	0	-1	0	0	0	-1	-1	0	-1	0.189633844631371	-1	1069.93396226415	-1	2.37735849056604	-1	0.666666666666667	22.9007633587786	0	0	33.2462949894143	0	460.339622641509	0	407.280898876405	0	0	-1	0	13.9166666666667	-1	0	-1	0	0	-1	0	-1	53424.625	-1	0.909090909090909	22.8484848484848	-1	11.1111111111111	1.09090909090909	-1	-1	97.5483870967742	0.0222222222222222
2013_44	16.3035230352304	0	-1	0	0	0	-1	-1	0	-1	0.199083601286174	-1	1837.02564102564	-1	3.94366197183099	-1	0.801047120418848	9.47872340425532	0	0	51.9307324840764	0	667.172413793103	0	398.346666666667	0	0	-1	0	13.7687074829932	-1	0	-1	-1	0	-1	0	-1	50134.3815028902	-1	2.9	7.24347826086957	-1	12.0093457943925	2.10810810810811	-1	-1	0	0
2013_45	8.59546925566343	0	-1	0	0	113.5	-1	-1	0	-1	0.322523364485981	-1	2160.77083333333	-1	1.32467532467532	-1	0.807174887892377	7.43877551020408	0	0	58.0146412884334	0	0	0	447.384615384615	0	0	-1	0.106870229007634	1.16778523489933	-1	0	-1	-1	0	-1	0	-1	80568.0801033592	-1	4.90909090909091	-1	-1	13.3636363636364	0.909090909090909	-1	-1	0	0
2013_46	9.01360544217687	0	-1	0	2.5625	-1	-1	-1	0	-1	0.401686182669789	-1	1480.1625	-1	4.4	-1	0.297979797979798	5.75423728813559	0	0	11.0574198359433	0	512.78431372549	0	171.058823529412	0	0	-1	0	11.4461538461538	0	292.276422764228	-1	0	0	-1	0	-1	66400.2960526316	-1	0.8125	-1	-1	20.0606060606061	0	-1	-1	65	0
2013_47	3.7984496124031	0	-1	0	0	0	-1	-1	0	-1	0.476306680512288	-1	0	-1	11.5443037974684	-1	0.312775330396476	11.6071428571429	0	0	17.5647279549719	0	0	0	283.071428571429	0	0	-1	0.2	3.33333333333333	0	353.403846153846	-1	0	0	-1	0	-1	107225.919282511	-1	0	-1	-1	16.7671232876712	0.846153846153846	-1	-1	0	0.0576923076923077
2013_48	10.965034965035	0	-1	0	0	0	-1	-1	0	-1	0.807456310679612	-1	764.287425149701	0	2.02222222222222	-1	0.567901234567901	8.55555555555556	0	1.33333333333333	24.9588719153937	0	490.172413793103	0	110.952380952381	0	0	-1	0	5.63114754098361	93.8333333333333	0	-1	0	0	-1	0	-1	109619.811659193	-1	0.693548387096774	-1	-1	19	3.64	-1	-1	0	0
2013_49	7.7008547008547	0	-1	0	0	0	-1	-1	0	-1	1.20249332146037	-1	976.35	0	7.74468085106383	-1	0.280632411067194	8.5981308411215	0	0	52.6195219123506	0	241.413793103448	0	147.136363636364	0	0	-1	0.274111675126904	7.41379310344828	129.387096774194	758.25	-1	-1	0	-1	0	-1	147711.073170732	-1	0.774193548387097	-1	-1	0	0.564102564102564	-1	-1	67.7446808510638	0
2013_50	3.81538461538462	0	-1	0	5.76470588235294	0	-1	-1	208.380952380952	-1	5.21010930418555	-1	2330.7898089172	0.0526315789473684	5.33898305084746	-1	1.1566265060241	4.35	0	3.84615384615385	122.391304347826	0	1083.65671641791	0	130.428571428571	0	0	-1	0.834042553191489	7.34328358208955	158.630769230769	209.174418604651	-1	-1	37.1923076923077	-1	0	-1	182708.734835355	-1	0.934426229508197	-1	-1	71.8533333333333	6.17647058823529	-1	-1	0	0.2
2013_51	0.809716599190283	1.48484848484849	-1	0	13.125	-1	-1	-1	585.666666666667	-1	5.38137629459148	-1	-1	1.17241379310345	0.666666666666667	-1	-1	5.30612244897959	0	1.1	182.573535436297	0	580.95652173913	0	117.428571428571	0	0	-1	0.657004830917874	17.4207920792079	67.4827586206897	302.336134453781	-1	-1	13.3125	-1	0	-1	230359.573770492	-1	0.862745098039216	-1	-1	72	0	-1	-1	0	0.72
2013_52	4.43181818181818	0	-1	0	2	-1	-1	-1	292.222222222222	-1	8.57693094629156	-1	-1	1.33333333333333	1.75	-1	1.46666666666667	0.95	0	-1	157.331775700935	0	190.318181818182	19.1666666666667	-1	-1	0.814814814814815	-1	0.678571428571428	28.436018957346	249.534246575342	1072.35555555556	-1	-1	20.6666666666667	-1	0	-1	190139.540355677	-1	0.357142857142857	-1	-1	29.5555555555556	0	-1	-1	136.903225806452	0
2014_01	6.1840490797546	0.388888888888889	-1	0	6.15384615384615	-1	959.658536585366	-1	1019.2	-1	13.7896330602066	-1	5467.83018867925	19.1136363636364	2.90909090909091	-1	2.97916666666667	7.01298701298701	136.631578947368	-1	246.296588868941	0	321.227272727273	0	0	0	0	-1	4.16723549488055	31.8949771689498	241.375	0	-1	-1	0	-1	0	-1	214056.06741573	-1	0.615384615384615	-1	-1	28.8947368421053	0.705882352941176	-1	-1	0	4.34730538922156
2014_02	8.22279792746114	12.7241379310345	-1	451.027027027027	1.82352941176471	0	4666.22222222222	-1	1248.45714285714	-1	14.3782795698925	-1	11866.4885496183	24.156862745098	0	-1	1.37142857142857	3.82352941176471	92.3333333333333	1.83333333333333	301.152882205514	8.91666666666667	1079.10714285714	70.9523809523809	0	95.8260869565217	1.58333333333333	-1	1.93939393939394	78.2175572519084	600.550295857988	2467.45205479452	-1	-1	14.2258064516129	-1	15.8571428571429	-1	293667.003780718	-1	2.46376811594203	-1	-1	76.7612903225806	16	-1	-1	52.9787234042553	4.22310756972112
2014_03	7.57575757575758	21.6836734693878	-1	0	6.54545454545455	-1	0	-1	2590.09210526316	-1	17.6686635783585	-1	11568.7628865979	67.4193548387097	4.05797101449275	-1	4.80544747081712	0	286.871794871795	5	447.198194810079	16.4615384615385	1593.69047619048	83.4181818181818	0	58.5128205128205	1.375	-1	5.5	136.257142857143	860.389221556886	1872.30158730159	-1	0	0	-1	21.4545454545455	-1	299740.189873418	-1	1.2	-1	-1	91.4189189189189	15.4054054054054	-1	-1	0	11.3257575757576
2014_04	9.04845814977974	40.3132530120482	-1	0	10	47.6666666666667	1604.44827586207	-1	3576.52380952381	-1	8.26177993231501	-1	6038.91743119266	43.3186813186813	1.88235294117647	-1	5.58139534883721	0	353.357142857143	4.57692307692308	759.134141990724	26.2926829268293	2118.05825242718	141.235294117647	0	441.473684210526	3.08108108108108	-1	9.5221843003413	186.222222222222	1259.6018957346	2912.32340425532	-1	0	70.1298701298701	-1	55.8461538461538	-1	313694.88023657	-1	5.36585365853659	-1	-1	107.95652173913	10.2970297029703	-1	-1	66.9583333333333	13.0084033613445
2014_05	5.20111731843575	35.9151943462898	-1	954.45871559633	47.578947368421	106	0	-1	2538.98692810458	-1	7.00994111188741	-1	4282.2131147541	52.3870967741935	0.444444444444444	-1	10.9746192893401	0	285.913043478261	8.46153846153846	1063.97022415524	85.25	2517.76	222.183823529412	0	441	13.8775510204082	-1	14.2892307692308	287.426470588235	2054.39647577093	2970.33457249071	-1	0	64.1714285714286	-1	41.14	-1	269929.577577046	-1	7.33333333333333	-1	-1	19.2222222222222	14.3932584269663	-1	-1	307.855670103093	12.4077669902913
2014_06	7.23333333333333	53.7471264367816	-1	3080.28985507246	70	41.8571428571429	1751.2962962963	-1	2468.91891891892	-1	5.18663733362666	-1	10180.21875	149.228915662651	2.36363636363636	-1	20.9940357852883	0.963855421686747	856	28.3428571428571	1352.73559322034	104.65625	3918.80597014925	203.222222222222	0	534.571428571429	21.2903225806452	-1	20.5510688836105	511.90243902439	2316.16216216216	4896.18897637795	-1	0	44.8846153846154	-1	42	-1	191303.741866667	-1	12.2772277227723	-1	-1	69.3243243243243	8.44329896907217	-1	-1	279.536764705882	6.59142212189616
2014_07	14.2297297297297	101.072463768116	-1	506.587155963303	127.630769230769	54.6206896551724	2654.04761904762	-1	2589	-1	7.58716414076548	-1	7806.14035087719	279.060402684564	1.36363636363636	-1	66.1946902654867	0.826086956521739	1282.85840707965	31.1666666666667	1513.00748863332	174.915254237288	4398.34074074074	210.669527896996	0	-1	31.6388888888889	-1	37.146	920.189189189189	1846.10788381743	9156.13333333333	-1	0	217.596638655462	-1	26.8292682926829	-1	186910.530997305	-1	12.9943502824859	-1	-1	109	29.6637931034483	-1	-1	245.205882352941	2.3405572755418
2014_08	5.25821596244131	64.4263322884013	-1	2232.68	182.727272727273	35.2592592592593	3569.20754716981	-1	1631.16279069767	-1	2.83625422297297	-1	8712.53781512605	326.822485207101	1.6	-1	39.6277205040092	0	1025.34072022161	33.5454545454545	1500.57361376673	107.181818181818	4302.47244094488	191.432835820896	0	1148.2	40.8870967741936	-1	44.0030911901082	1104.9375	1433.12258064516	8300.79256965944	-1	0	199.411764705882	-1	42.7142857142857	-1	168949	-1	11.656050955414	-1	-1	62.7945205479452	18.5294117647059	-1	-1	379.212598425197	3.52592592592593
2014_09	10.2666666666667	78.7650602409639	-1	2360.05839416058	170.044117647059	37.578947368421	5256.79411764706	-1	1021.05263157895	-1	4.27846578705124	-1	16910.5671641791	355.909090909091	0.689655172413793	-1	34.1379310344828	0	968	18.1818181818182	1041.55099894848	91	3327.78947368421	177.987096774194	0	1432.7191011236	54.3888888888889	-1	46.609126984127	972.532738095238	1876.565	9377.84431137724	-1	0	262.215827338129	-1	29.4736842105263	-1	132151.884925201	-1	5.54411764705882	-1	-1	129.095890410959	23.3181818181818	-1	-1	978.039215686274	0.669856459330144
2014_10	12.9884393063584	130.388732394366	-1	5578.11111111111	170.217391304348	71.4	1285.53658536585	-1	1191	-1	4.69061918990704	-1	16981.2042253521	477.578947368421	1.35135135135135	-1	35.3951612903226	1.94871794871795	940.88850174216	55.4074074074074	670.422248107164	52.2857142857143	4309.79310344828	135.525	0	1514.84210526316	42.5	-1	35.3392070484581	604.742268041237	864.780487804878	6665.96357615894	-1	-1	247.591240875912	-1	51.3684210526316	-1	106286.288352273	-1	17.1239669421488	-1	-1	164.418300653595	19.1372549019608	-1	-1	1035.38547486034	0.861111111111111
2014_11	8.01818181818182	134.794520547945	-1	2651.90082644628	104.324324324324	82.1739130434783	2058.40579710145	-1	614.95652173913	-1	3.66441592920354	-1	21874.8191881919	662.012903225806	1.15	-1	23.1001615508885	0	858.549450549451	24.1739130434783	506.496914582657	36	4848.86554621849	119.840637450199	30.5833333333333	490.714285714286	24.8769230769231	-1	27.7944325481799	508.450549450549	656.536312849162	4143.47196261682	-1	0	206.637795275591	-1	36.7857142857143	-1	106048.877005348	-1	24.9727272727273	-1	-1	219.220338983051	16.5853658536585	-1	-1	869.700934579439	0.10077519379845
2014_12	7.38157894736842	108.422287390029	-1	4887.65625	85.75	187.941176470588	1096.25423728814	-1	632.8	-1	4.57337010045302	-1	17489.3538461538	546.452380952381	1.26666666666667	-1	15.3517017828201	0	901.041666666667	13.8461538461538	407.88	10.6153846153846	5971.45631067961	50.6553191489362	29.1714285714286	484.939393939394	14.28	-1	16.3477157360406	275.823529411765	299.318181818182	4095.88349514563	-1	-1	294.666666666667	-1	23.2941176470588	-1	100516.946882217	-1	14.6739130434783	-1	-1	107.173913043478	21.7446808510638	-1	-1	994.137931034483	0.254545454545455
2014_13	7.75330396475771	83.0035335689046	-1	4531.03448275862	49.5	224	0	-1	418.142857142857	-1	3.175152	-1	20496.3315217391	297.193798449612	0.385964912280702	-1	7.59006211180124	0.94	496.623376623377	7.52631578947368	298.911924789708	14.9090909090909	2317.5	41.25	31.6285714285714	332.117647058824	8.03571428571428	-1	12.1966019417476	150.698795180723	215.261538461538	822	-1	-1	191.015625	-1	27	-1	60174.5777777778	-1	15	-1	-1	132.502262443439	4.35	-1	-1	736.512	0.0421052631578947
2014_14	9.55813953488372	25.9178082191781	-1	4629.56989247312	37.3333333333333	229.5	0	-1	0	-1	3.47384108385207	-1	20043.7621621622	561.21359223301	0.347826086956522	-1	3.64705882352941	1.7979797979798	1247.68674698795	2.93333333333333	243.504108264862	11.8571428571429	2918.35616438356	52.3076923076923	0	301.259259259259	6.23076923076923	-1	7.34924623115578	64.4528301886792	93.4074074074074	665.951219512195	-1	0	340.615384615385	-1	37.2727272727273	-1	68045.66	-1	20.7761194029851	-1	-1	125.167539267016	4.72222222222222	-1	-1	770.571428571429	0.285714285714286
2014_15	7.04838709677419	-1	-1	8379.5625	13.6	206.243902439024	949.506172839506	-1	675	-1	4.26298136645963	-1	13052.6231155779	74.1947368421053	0.537313432835821	-1	1.03571428571429	0	361.979166666667	0	153.697624190065	9.25	1959.65517241379	20.8620689655172	102.222222222222	347.941176470588	-1	-1	2.18649517684887	25.5449101796407	25.2987012987013	82.687898089172	-1	-1	122.43137254902	-1	19.2	-1	65959.7333333333	-1	21.3404255319149	-1	-1	128.206451612903	5.79545454545454	-1	-1	343.876923076923	0
2014_16	6.69076305220884	-1	-1	6516.36363636364	2.625	138.642857142857	0	-1	0	-1	4.32475591343734	-1	6711.6	179.522388059701	0	-1	0.41025641025641	0	550.37037037037	0.833333333333333	-1	8.26666666666667	1935.25	5.46341463414634	76.2857142857143	41.4615384615385	-1	-1	0.961165048543689	5.20353982300885	44.6923076923077	215.830508474576	-1	0	103.90243902439	-1	0	-1	37147.5806451613	-1	14.2745098039216	-1	-1	88.9090909090909	1.26086956521739	-1	-1	214.59649122807	0
2014_17	2.30894308943089	-1	-1	2361.2972972973	7	133.157894736842	6121.28125	-1	0	-1	3.23904805914972	-1	5459.89304812834	13.5	0	-1	0.549019607843137	0.923076923076923	141.510204081633	3.25	-1	0	1006.37037037037	14.4262295081967	0	0	-1	-1	0.416184971098266	4.70921985815603	0	0	-1	0	187.372881355932	-1	6.83333333333333	-1	30748.1067961165	-1	16.2790697674419	-1	-1	135.529411764706	1.3125	-1	-1	284.258064516129	0
2014_18	4.65	-1	-1	6701.65714285714	6	106.75	6800.28571428571	-1	0	-1	2.34952551936394	-1	5477.01388888889	6.63636363636364	0.518518518518518	-1	0.907563025210084	0	255.969230769231	-1	-1	10.25	1708.5	1.72916666666667	25.8888888888889	0	-1	-1	0.123529411764706	7.30327868852459	-1	0	-1	-1	67.3548387096774	-1	0	-1	30455.7416267943	-1	12.5675675675676	10.151724137931	-1	106.283261802575	0	-1	-1	0	0
2014_19	5.93548387096774	-1	-1	0	0	109.0625	12170.0338983051	-1	0	-1	2.18460360852925	-1	10261.838028169	3.92857142857143	0	-1	0.915422885572139	0.890909090909091	0	5.5	-1	0	1001.125	1.72093023255814	152	0	-1	-1	0	-1	-1	0	-1	-1	129.5	-1	0	-1	16845.7206703911	-1	6.64285714285714	4.17621145374449	-1	130.266009852217	0	-1	-1	0	0
2014_20	4.88194444444444	-1	-1	2982.59154929577	0	66.25	23424.0647482014	-1	0	-1	1.56127272727273	-1	12179.1920529801	4.5	0	-1	0.215469613259669	1.96396396396396	0	0	-1	0	2268.85714285714	0	418.285714285714	0	-1	-1	0.0661764705882353	-1	-1	0	-1	-1	50.4166666666667	-1	0	-1	45338.3116883117	-1	4.07142857142857	9.52195121951219	-1	121.076233183857	0	-1	-1	253.157894736842	0.0714285714285714
2014_21	3.8693009118541	-1	-1	-1	0	60.1875	34677.7985611511	-1	0	-1	1.40198087954111	-1	14301.1184210526	-1	0	-1	-1	2.82857142857143	101.761904761905	0	-1	0	1292.64	-1	129.290322580645	-1	-1	-1	0.0232558139534884	-1	-1	0	-1	-1	-1	-1	-1	-1	37095.1004016064	-1	5	6.7979274611399	-1	131.24	0	-1	-1	0	0
2014_22	4.3343653250774	-1	-1	-1	-1	46.2	36077.8881578947	-1	0	-1	0.747696606786427	-1	8989.34558823529	-1	0	-1	-1	7.52941176470588	48.5227272727273	-1	-1	0	481	7.33333333333333	181.054054054054	-1	-1	-1	0.144827586206897	-1	-1	0	-1	-1	-1	-1	-1	-1	32949.6153846154	-1	5.17647058823529	11	-1	85.2700729927007	0	-1	-1	147.692307692308	-1
2014_23	4.57142857142857	-1	-1	-1	-1	12.0869565217391	34245.3555555556	-1	-1	-1	0.339194499017682	-1	7669.17647058824	-1	0	-1	-1	6.20338983050847	0	-1	-1	0	0	0	288.25641025641	-1	-1	-1	0.03	-1	-1	0	-1	-1	-1	-1	-1	-1	37770.9365853659	-1	2.75	13.373786407767	-1	99.2964824120603	0	-1	-1	165	0
2014_24	7.42528735632184	-1	-1	-1	0	30.5217391304348	36131.6917293233	-1	0	-1	0.219020979020979	-1	7588.48170731707	-1	0.509803921568627	-1	-1	7.54285714285714	0	-1	-1	0	0	0	133.806451612903	-1	-1	-1	0	-1	-1	0	-1	-1	-1	-1	-1	-1	29181.958974359	-1	0	20.0423728813559	-1	54.0909090909091	0	-1	-1	104.3125	-1
2014_25	10.0412979351032	-1	-1	-1	-1	68.6842105263158	30546.8181818182	-1	0	-1	0.267601957585644	-1	5248	-1	0	-1	-1	3.87755102040816	0	-1	-1	0	0	-1	272.25	-1	-1	-1	0.181034482758621	-1	-1	-1	-1	-1	-1	-1	-1	-1	30064.4105263158	-1	0	20.1694915254237	-1	60.4026845637584	0	-1	-1	0	-1
2014_26	20.0076923076923	-1	-1	-1	0	140	40038.2653061224	-1	-1	-1	0.145886961387801	-1	5708.42105263158	-1	0.402985074626866	-1	-1	2.89285714285714	0	-1	-1	-1	0	0	320.03125	-1	-1	-1	0	-1	-1	-1	-1	-1	-1	-1	-1	-1	38260.1538461538	-1	3.375	24.719387755102	-1	50.6969696969697	0	-1	-1	256.571428571429	-1
2014_27	35.0301075268817	-1	-1	-1	-1	231.642857142857	33629.1319796954	-1	0	-1	0.132772466539197	-1	5672.96	-1	0.433333333333333	-1	-1	9.27710843373494	0	-1	-1	-1	0	-1	335.636363636364	-1	-1	-1	0	-1	-1	-1	-1	-1	-1	-1	-1	-1	46114.5948717949	-1	0	34.6440329218107	-1	27.2783505154639	0	-1	-1	-1	-1
2014_28	38.6160714285714	-1	-1	-1	-1	216.24	36863.9444444444	-1	-1	-1	0.0926586261143157	-1	6018.41025641026	-1	0.333333333333333	-1	-1	2.76623376623377	0	-1	-1	-1	454.142857142857	-1	311.25	-1	-1	-1	0	-1	-1	-1	-1	-1	-1	-1	-1	-1	42225.2285714286	-1	8.14285714285714	60.0953389830509	-1	57.6	0	-1	-1	0	-1
2014_29	43.993984962406	-1	-1	-1	-1	107.434782608696	22951.020746888	-1	-1	-1	0.125183544303797	-1	8312.27826086957	-1	0.444444444444444	-1	-1	7.58426966292135	0	-1	-1	-1	0	-1	164.190476190476	-1	-1	-1	0.0425531914893617	-1	-1	-1	-1	-1	-1	-1	-1	-1	47161.567839196	-1	0	62.3514563106796	-1	64.6354166666667	0	-1	-1	0	-1
2014_30	62.6666666666667	-1	-1	-1	-1	165.176470588235	16791.8904109589	-1	-1	-1	0.0491188358932902	-1	8195.2	-1	0.846153846153846	-1	-1	11.375	0	-1	-1	-1	0	-1	176.48275862069	-1	-1	-1	0	-1	-1	-1	-1	-1	-1	-1	-1	-1	23854.8187134503	-1	0	85.2233009708738	-1	60.4166666666667	0	-1	-1	0	-1
2014_31	91.5889655172414	-1	-1	-1	-1	174	19574.9596774194	-1	-1	-1	0.0281674673987646	-1	11113.5566037736	-1	0	-1	-1	17.4166666666667	0	-1	-1	-1	0	-1	105.777777777778	-1	-1	-1	0	-1	-1	-1	-1	-1	-1	-1	-1	-1	45922.0621118012	-1	3.5	96.8606431852986	-1	96.2127659574468	0	-1	-1	0	-1
2014_32	113.004975124378	-1	-1	-1	-1	73.5	15782.1445783133	-1	0	-1	0.0296455070074196	-1	8186.64406779661	-1	0.636363636363636	-1	-1	12.6923076923077	0	0	-1	-1	0	-1	154.727272727273	-1	-1	-1	0	-1	-1	-1	-1	-1	-1	-1	-1	-1	35945.25	-1	0	135.938848920863	-1	79.8347107438017	0	-1	-1	0	-1
2014_33	113.877641824249	-1	-1	-1	-1	83.3225806451613	15606.1789473684	-1	0	-1	0.0344772545889864	-1	9470.59770114943	-1	0	-1	-1	7.30434782608696	0	0	-1	-1	945.75	-1	53.2666666666667	-1	-1	-1	0	-1	-1	-1	-1	-1	-1	-1	-1	-1	22455.2045454545	-1	0	97.3994845360825	-1	36.5555555555556	0	-1	-1	0	-1
2014_34	137.333333333333	-1	-1	-1	-1	138.16	12419.2528735632	-1	-1	-1	0.0564901185770751	-1	8637.05208333333	-1	0.522727272727273	-1	-1	5.86363636363636	-1	0	-1	-1	0	0	228.25	-1	-1	-1	0.0253164556962025	-1	-1	-1	-1	-1	-1	-1	-1	-1	55658.6953125	-1	0	192.95777027027	-1	41.5	0.782608695652174	-1	-1	0	-1
2014_35	136.327228327228	-1	-1	-1	-1	70.2173913043478	11430.5078125	-1	0	-1	-1	-1	13942.8125	-1	0.742857142857143	-1	-1	4	0	-1	-1	-1	0	0	0	-1	-1	-1	0	-1	-1	-1	-1	-1	-1	-1	-1	-1	38101.1428571429	-1	0	106.890207715134	-1	39.9139784946237	0	-1	-1	0	-1
2014_36	97.6355140186916	-1	-1	-1	0	165.255813953488	6912.73043478261	-1	-1	-1	-1	-1	13800.6315789474	-1	3.67796610169492	-1	-1	5.95	0	0	-1	-1	377.642857142857	0	0	-1	-1	-1	0.0172413793103448	-1	-1	-1	-1	-1	-1	-1	-1	-1	63718.6348122867	-1	0	93.5790960451977	-1	37.95	0.642857142857143	-1	-1	0	-1
2014_37	88.1057692307692	-1	-1	-1	0	98.25	4917.29	-1	-1	-1	-1	-1	11566.5283018868	-1	3.5632183908046	-1	-1	4.59016393442623	0	0	-1	-1	422.733333333333	-1	138	-1	-1	-1	0.0975609756097561	-1	-1	-1	-1	-1	-1	-1	-1	-1	63814.6071428571	-1	0	57.7754800590842	-1	57.5671641791045	1.94594594594595	-1	-1	0	0
2014_38	59.1642228739003	-1	-1	-1	0	22.0833333333333	4468.15789473684	-1	-1	-1	-1	-1	15644.1176470588	-1	0.511111111111111	-1	-1	7.40298507462687	0	0	-1	-1	0	0	0	-1	-1	-1	0	-1	-1	-1	-1	-1	-1	-1	-1	-1	83644.9090909091	-1	3.28571428571429	42.0491803278689	-1	23.458064516129	0	-1	-1	0	0
2014_39	32.4447949526814	-1	-1	-1	0	50.2	4443.98648648649	-1	-1	-1	-1	-1	15273.595505618	-1	2.66666666666667	-1	-1	2.75	0	0	-1	-1	0	0	70.6304347826087	-1	-1	-1	0.0598290598290598	-1	-1	-1	-1	-1	-1	-1	-1	-1	75730.2379746836	-1	0	-1	-1	34.5454545454545	0	-1	-1	0	0
2014_40	25.4297872340426	0	-1	0	1.66666666666667	92.12	-1	-1	-1	-1	-1	-1	18389.4285714286	-1	2.94059405940594	-1	0.176470588235294	0.955555555555556	0	0	84.748717948718	0	0	0	81.5806451612903	0	0	-1	0	0.827338129496403	-1	-1	-1	-1	0	0	0	-1	88810.6818181818	0	5.85714285714286	-1	3.53189726594863	47.7117117117117	0	-1	-1	151.47619047619	0
2014_41	12.9958506224066	0	-1	0	1.33333333333333	-1	-1	-1	0	-1	-1	-1	12617.7173913043	-1	4.21917808219178	0	0	2.82857142857143	0	5	102.577554744526	0	286.022727272727	0	164.093023255814	0	0	-1	0	1.62295081967213	-1	0	-1	-1	45.2592592592593	-1	0	-1	86777.9204244032	1029	5.57575757575758	-1	9.12536656891496	91.7142857142857	0	-1	-1	0	0
2014_42	9.16580310880829	9.96774193548387	-1	0	0	34.6363636363636	-1	-1	0	-1	-1	-1	15338.7586206897	-1	2.1	0	0.874371859296482	2.45454545454545	0	0	160.081330868762	0	0	0	148.933333333333	0	0	-1	0.138364779874214	1	7.53333333333333	0	-1	-1	0	0	0	-1	83000.6632653061	0	7.35483870967742	-1	0.992455418381344	77.1946902654867	0	-1	-1	0	0
2014_43	3.27363184079602	30.2222222222222	-1	0	1.43478260869565	19.8823529411765	-1	-1	1723.2	-1	-1	-1	14552.2903225806	0	5.91549295774648	64.8125	1.03964757709251	1.91666666666667	0	0.846153846153846	195.109666937449	61.7777777777778	385.59375	0	143.875	0	0	-1	0	4.18181818181818	14.8064516129032	0	-1	-1	0	0	0	-1	76895.975308642	267	11.5945945945946	-1	2.3307210031348	52.3953488372093	0	-1	-1	0	0
2014_44	7.36507936507936	0	-1	0	2.44444444444444	37.3636363636364	-1	-1	788.333333333333	-1	-1	-1	16356.0222222222	0	3.77777777777778	-1	0	3.06818181818182	0	0	93.1803607214429	0	407.923076923077	116.5	26.6046511627907	0	0	-1	0	2.21212121212121	0	0	-1	-1	0	0	0	-1	75313.3941908714	374.5	11.9117647058824	-1	2.72402382528127	77.1794871794872	0	-1	-1	0	0
2014_45	8.30860534124629	0	-1	0	0	17.4166666666667	-1	-1	0	-1	-1	-1	13273.3333333333	0	1.47413793103448	0	0	2.18181818181818	0	0	13.8357570573139	0	323.842105263158	98	288.235294117647	0	0	-1	0.0833333333333333	3.12592592592593	0	0	-1	-1	0	0	0	-1	70369.5106685633	171.555555555556	10.9473684210526	-1	12.4466273739358	76.6162790697674	0	-1	-1	0	0
2014_46	8.9375	0	-1	0	5.23076923076923	30.6666666666667	-1	-1	0	-1	-1	-1	21338.1758241758	0	4.19117647058824	0	0.537414965986394	3.15789473684211	0	0	51.6223776223776	0	158.061728395062	54.6428571428571	268.5	0	0	-1	0.260115606936416	3.43790849673203	10.7397260273973	0	-1	-1	28.3333333333333	0	0	-1	64447.2574257426	839	6.05405405405405	-1	17.4597701149425	124.839506172839	0	-1	-1	210.258064516129	0.0461538461538462
2014_47	2.65	0	-1	0	6.85714285714286	0	-1	-1	0	-1	-1	-1	19799.6235294118	0	2.95774647887324	0	0.836734693877551	4.625	0	6.33333333333333	155.810452418097	0	153.811764705882	0	80.2105263157895	0	0	-1	0.16	8.70857142857143	44.2105263157895	592.733333333333	-1	-1	71.0833333333333	0	26.75	-1	105618.018018018	706.25	5.74468085106383	-1	17.4003634161114	73.68	0	-1	-1	0	0.0571428571428571
2014_48	1.80237154150198	-1	-1	0	14.25	19.7	-1	-1	0	-1	-1	-1	21909.1463414634	-1	16.3416666666667	339.36	0.273885350318471	6.15384615384615	0	2.54545454545455	361.194868662187	0	437.869565217391	0	0	0	-1	-1	0.0796812749003984	6.08780487804878	0	639.724137931034	-1	0	199.230769230769	0	0	-1	110019.309392265	841.384615384615	12.0833333333333	-1	37.1168	146	0.931034482758621	-1	-1	0	0.178571428571429
2014_49	3.10526315789474	7.18181818181818	-1	0	0	0	-1	-1	0	-1	-1	-1	18634.6022727273	-1	2.7906976744186	0	0.261538461538462	8.6764705882353	0	7.5	324.910656620022	0	402.935779816514	40.2727272727273	-1	0	0	-1	0.0823970037453184	8.98989898989899	54.45	620.386363636364	-1	0	139.301587301587	0	60	-1	196991.97740113	487.5	11.5862068965517	-1	58.5838235294118	148.5	0	-1	-1	0	0
2014_50	3.76518218623482	24.4086956521739	-1	1822.89473684211	16.2222222222222	0	-1	-1	0	-1	-1	-1	15444.5945945946	10.72	5.07692307692308	162.5	0	3	0	2.07692307692308	993.573333333333	23.2222222222222	672.112068965517	0	-1	0	0	-1	0.823943661971831	9.84210526315789	194.07299270073	589.5	-1	-1	48.5416666666667	0	17.0588235294118	-1	229856.691056911	973.894736842105	38.3058823529412	-1	75.7616054158607	154.849315068493	0.666666666666667	-1	-1	105.542857142857	0.326086956521739
2014_51	1.97826086956522	30.7885714285714	-1	1423.29411764706	49.6363636363636	0	-1	-1	0	-1	-1	-1	17666.7692307692	7.52	1.63380281690141	-1	0.632098765432099	5.13698630136986	91.3589743589744	16.25	2056.30979133226	0	2300.19047619048	48.75	-1	72.4230769230769	0	-1	1.37543859649123	14.4267782426778	485.989304812834	283.840304182509	-1	0	240	6	34.6153846153846	-1	247835.625	1473	73.5	-1	149.955969517358	93.3333333333333	0	-1	-1	0	1.04545454545455
2014_52	2.975	-1	-1	631.709677419355	24	0	-1	-1	0	-1	-1	-1	13462.4583333333	23.4831460674157	1.22950819672131	-1	1.30030959752322	11.8	0	9.66666666666667	4032.12765957447	34.3333333333333	2208.56	222.75	-1	-1	1.3125	-1	0.956175298804781	14.5859030837004	557.792792792793	1976.54032258065	-1	0	183.913043478261	2.25	43.6666666666667	-1	309302.853658537	1456	46	-1	113.022309711286	173.506493506493	-1	-1	-1	0	0.354838709677419
2015_01	2.02816901408451	-1	-1	484.072463768116	25.3333333333333	-1	-1	-1	0	-1	-1	-1	-1	41.8518518518518	-1	530.4	1.66043613707165	-1	339.782608695652	29.4444444444444	5858.19237952932	0	1859.27659574468	252.744186046512	-1	0	7.2	-1	3.42909090909091	20.8595041322314	1147.41818181818	0	-1	-1	229.752475247525	0	10.5555555555556	-1	-1	994.685714285714	69.5162790697674	-1	310.641815235008	20.3333333333333	-1	-1	-1	55.65	2.78969957081545
2015_02	5.6221198156682	68.9719626168224	-1	5943.25925925926	82.6029411764706	-1	0	-1	375.153846153846	-1	-1	-1	15121.1408450704	359.375	0.457142857142857	822.5	3.64472497745717	3.94594594594595	159.787234042553	15.5294117647059	12695.3041172801	32.8	6691.82608695652	684.666666666667	0	742.941176470588	6.91891891891892	-1	14.5257452574526	60.3076923076923	2635.97368421053	1210.12121212121	-1	144.1875	335.384615384615	35.3333333333333	50	-1	148283.383855025	2086.72413793103	109.815709969789	-1	644.861687413555	70.3061224489796	3.60655737704918	21.7647058823529	0	0	15.5882352941176
2015_03	7.30729166666667	105.364383561644	-1	9145.01020408163	214.107142857143	0	0	-1	984.6	-1	-1	-1	16977.1925465839	1056.13541666667	2.9	1246.28571428571	4.25041736227045	5.73493975903614	361.714285714286	26.6129032258065	28850.8102339181	61.6666666666667	8816.52985074627	996.014184397163	40.9666666666667	1524.40506329114	-1	-1	13.6815642458101	146.294642857143	4430.64277180406	4248.95473251029	-1	0	497.372384937239	29.3333333333333	55.0333333333333	-1	163575.050847458	2796.66666666667	101.065088757396	-1	641.786252354049	30.1734104046243	2.58227848101266	6.80357142857143	0	188.375	25.3147632311978
2015_04	2.4	204.321223709369	-1	18317.085106383	422.321428571429	0	0	-1	2095.625	-1	-1	-1	13859.9322033898	2378.83064516129	3.20833333333333	2778.36363636364	5.718901453958	5.16666666666667	1149.67741935484	34.6153846153846	68795.634158666	31.4	10976.7180851064	1635.5905511811	0	4538.16	26.3414634146341	-1	20.9007263922518	-1	5703.63445761167	4491.14134275618	-1	1342.30769230769	876.640776699029	187.885714285714	100.827586206897	-1	189255.753623188	1123	112.875	-1	1046.61913937058	72.0619469026549	0.887096774193548	13.6086956521739	0.432432432432432	99.0461538461539	31.4371859296482
2015_05	0.921465968586388	282.171215880893	-1	21467.0361445783	732.980769230769	27.75	0	-1	2536.125	-1	-1	-1	15990.6797385621	3273.77777777778	1.93181818181818	6295.11627906977	12.0609065155807	5.3968253968254	1305.89150943396	48	139703.142988717	107.142857142857	12739.1625	1170.87081339713	0	7320.59555555556	68.4848484848485	-1	23.8	595.868945868946	5290.77407740774	848.295900178253	-1	848.421052631579	826.355509355509	332.181818181818	76.5217391304348	-1	209179.993277311	1865.11111111111	104.300699300699	-1	1869.83453436807	65.6695652173913	2.8314606741573	23.0545454545455	0.48	454.548387096774	13.7557251908397
2015_06	1.46938775510204	356.732064421669	-1	36165.2655367232	812.549019607843	21.1428571428571	0	-1	1853.18518518518	-1	-1	-1	14619.7333333333	5087.00367647059	2.2463768115942	9920.33742331288	25.6321243523316	6.61111111111111	1894.97692307692	44.8965517241379	186954.722232256	122.2	14285.712	1128.45348837209	0	9065.2380952381	111.923076923077	-1	26.7108655616943	834.182305630027	4717.72727272727	0	-1	1290.66666666667	858.990291262136	1033.02702702703	75.0074074074074	-1	131706.689090909	1338.07142857143	112.7	-1	2739.50552486188	97.8632478632479	0	4.88059701492537	0	582.866666666667	12.6222222222222
2015_07	2.12182741116751	405.829725829726	-1	23577.5423728814	698.210526315789	84.4666666666667	0	-1	1824.97959183673	-1	-1	-1	14200.8625	6106.77777777778	1.63265306122449	11314.6	46.7690288713911	0.762295081967213	2139.25650557621	22.6896551724138	200041.196953377	75.7058823529412	17533.9789473684	687.162162162162	0	9286.38805970149	137.741935483871	-1	68.7345575959933	737.697297297297	3348.28509249184	8862.84528301887	-1	2138.85714285714	701.327710843373	1254.59459459459	85.6015037593985	-1	116526.271973466	868.4375	115.370967741935	-1	4044.22405037579	97.4563106796116	4.25806451612903	12.3272727272727	1.25	1924.20382165605	7.04388714733542
2015_08	2.68292682926829	313.195020746888	-1	22041.50390625	341.176470588235	95	0	-1	1109.39393939394	-1	-1	-1	15777	5760.87336244541	1.38888888888889	7968.0303030303	57.3432835820896	5.86734693877551	2074.70564516129	30.0606060606061	141203.146995708	75.5	16251.5587188612	813.15	0	8273.26130653266	116	-1	60.2863436123348	745.764705882353	2293.98	-1	-1	1480.33333333333	571.583113456464	1370.29824561404	48.48	-1	115973.802197802	1178.82352941176	98.2151029748284	-1	4580.33851543683	110.822429906542	1.12	45.2542372881356	0	1680.44036697248	7.15734265734266
2015_09	2.40343347639485	350.630265210608	-1	12822.5960591133	243.733333333333	36.3870967741935	0	-1	2166.28571428571	-1	-1	-1	10689.9928571429	4623.53136531365	4.57142857142857	5469.56934306569	70.3833017077799	3.96551724137931	2058.30769230769	53.3928571428571	60897.0414160509	69.54	19150.3111111111	1137.42704626335	0	5396.18592964824	-1	-1	43.1827242524917	636.380136986301	1576.43083573487	12184.1022727273	-1	872	449.529010238908	1928.12307692308	110.389380530973	-1	95315.6747404844	392.166666666667	82.9643705463183	-1	4159.2144313086	108.89247311828	1.45454545454545	0	2.90909090909091	1734.9406779661	2.92857142857143
2015_10	4.26086956521739	285.300546448087	-1	18476.0563380282	131.75	86.25	0	-1	1818.20930232558	-1	-1	-1	8318.72093023256	3611.06145251397	0.666666666666667	2848.18446601942	72.3758865248227	0	1383.23353293413	41.8064516129032	29010.2249484063	55.578947368421	11615.9534883721	986.350710900474	0	2636.76363636364	81.304347826087	-1	21.1538461538462	286.742647058824	1242.18115942029	-1	-1	-1	357.308823529412	1405.50877192982	43.7164179104478	-1	94676.1206896552	1159	76.3368421052631	-1	2918.63918757467	142.415094339623	0.838709677419355	10.0434782608696	1.06666666666667	1414.80321285141	0.656652360515022
2015_11	3.41880341880342	205.395348837209	-1	15329.015625	124.32	110.6	0	-1	1762.54545454545	-1	-1	-1	6554.2421875	2119.30921052632	4.77777777777778	1979.58461538462	82.2771305947272	3.78787878787879	1425.38721804511	16.7368421052632	15388.8899748674	20	9641.3631840796	689.092105263158	0	791.653333333333	54.5	-1	20.8320158102767	272.129032258065	1077.14659685864	4358.65909090909	-1	-1	383.728813559322	1325.17647058824	41.2105263157895	-1	74195.7737704918	1097	41.304347826087	-1	2208.34400614754	185.337209302326	1.34042553191489	12.6571428571429	0.560975609756098	1681.29479768786	0.139175257731959
2015_12	2.7752808988764	172.843601895735	-1	10999.2413793103	101.52380952381	125.4	0	-1	1193	-1	-1	-1	4920	818.782608695652	1.27868852459016	2270.11764705882	64.4074196753892	0	640.042105263158	5.66666666666667	8553.53416149068	13.5555555555556	7669.23287671233	480.282178217822	0	1215.06666666667	58.5714285714286	-1	12.8966480446927	78.7228915662651	727.317073170732	452.083086053412	-1	-1	222.359832635983	655.5	69.7924528301887	-1	76584.9964285714	813.076923076923	33.6	-1	1612.42495585639	229.297297297297	3.42857142857143	6.89041095890411	8.06666666666667	1406.9696969697	0.0933333333333333
2015_13	4.87878787878788	105.923705722071	-1	5421.51724137931	64.4285714285714	115.171875	0	-1	1375	-1	-1	-1	4837.32283464567	391	0.315789473684211	1791.36363636364	49.4314501619288	0.94017094017094	702.571428571429	15.2941176470588	4826.1729663106	38.9189189189189	6459.26470588235	321.985815602837	0	775.056603773585	26.0869565217391	-1	9.81333333333333	42	694.545454545455	553.097826086957	-1	-1	307.083333333333	822	47.2	-1	49188.3890577508	1317.27272727273	45.734693877551	-1	1174.69923815833	227.787610619469	0.303030303030303	4.02307692307692	5.5531914893617	1310.20168067227	0.124183006535948
2015_14	5.84210526315789	20.5321888412017	-1	7188.61111111111	54	64.390243902439	0	-1	1576.125	-1	-1	0.185983827493261	3317.5	484.66265060241	0	1194.625	18.1355013550135	0	678.235897435897	16	2829.62467866324	33.5	5011.85454545455	150.909090909091	0	-1	18.1627906976744	7.63076923076923	5.5688622754491	14.8943661971831	320.661157024793	392.691891891892	-1	-1	297.497487437186	-1	43.4782608695652	-1	48348.9539748954	541.2	26.0431034482759	-1	416.050632911392	195.708333333333	1.75	0	1.15789473684211	921.69014084507	0.0471698113207547
2015_15	3.19354838709677	15.7974683544304	-1	5117.76595744681	0	96.0227272727273	0	-1	720.32	-1	-1	0.2	4156.07692307692	85.4893617021277	2.09090909090909	-1	15.6304585152838	3.18947368421053	851.666666666667	11.625	1374.13366336634	0	4036.29545454545	127.411764705882	0	103.444444444444	19.1842105263158	11.6470588235294	8.66783216783217	10.4406779661017	187.440414507772	242.253807106599	-1	-1	287.904411764706	122.285714285714	22.3076923076923	-1	27540.6153846154	810	24.9615384615385	-1	523.981284559762	261.127272727273	0.366666666666667	8.09917355371901	4	444.444444444444	0
2015_16	4.76588628762542	-1	-1	1127.30952380952	0	46.9333333333333	0	-1	550	-1	-1	0.177083333333333	3811.29770992366	44.8421052631579	2.47191011235955	555.714285714286	7.83146766169154	1.6039603960396	518.48322147651	0.8	-1	0	3222.17142857143	176.052631578947	0	121.846153846154	19.3333333333333	5.78468899521531	4.34843205574913	13	133.892617449664	303.227272727273	-1	-1	287.284482758621	49.7142857142857	3	-1	27902.8806584362	333.75	23.4418604651163	-1	367.729458041958	159.40350877193	1.14285714285714	0	1.92	976.836734693878	0
2015_17	7.32727272727273	-1	-1	0	0	29.0810810810811	0	-1	1788.8	-1	-1	0.33695652173913	5364.67741935484	0	0.777777777777778	468.695652173913	4.11248073959938	0	-1	1.33333333333333	-1	5.09523809523809	1606.64516129032	76.5483870967742	0	40.2666666666667	3.42857142857143	10.24	3.66952789699571	-1	24.0380952380952	514.166666666667	-1	-1	197.4	90.75	0	-1	29462.9907692308	0	20.5714285714286	-1	238.997422680412	161.777777777778	0.147058823529412	6.15789473684211	8.85227272727273	846.3	0
2015_18	9.11111111111111	-1	-1	0	-1	74.5945945945946	0	-1	463.25	-1	-1	0.835030549898167	6206.07518796992	8.75	0.3125	235.384615384615	2.98279158699809	1.81818181818182	599.272727272727	2.2	-1	10.9090909090909	2082.5	49.3714285714286	0	0	0	8.57142857142857	0.703517587939698	-1	-1	-1	-1	-1	194.960396039604	67	0	-1	32826.5466237942	-1	27.7894736842105	-1	152.747328724073	174.6	0	6.02521008403361	6.609375	0	0
2015_19	8.97239263803681	-1	-1	0	7	264	0	-1	0	-1	-1	0	4470.62992125984	1.2	0.4375	182.117647058824	2.65041493775934	0.824324324324324	254.636363636364	0	-1	7.66666666666667	758.285714285714	110.8	0	0	2.72727272727273	9.54411764705882	0.807339449541284	-1	-1	0	-1	-1	206.347826086957	34	0	-1	24691.4731182796	-1	10.2222222222222	2.06951871657754	107.596757322176	141.068493150685	0	33.7962962962963	9.1875	399.304347826087	0
2015_20	12.3382789317507	-1	-1	0	-1	39.4418604651163	0	-1	0	-1	-1	0.117004680187207	5144.0802919708	0	3.52941176470588	138.888888888889	1.30534351145038	2.953125	168.732394366197	0	-1	0	624.777777777778	0	0	0	1.63636363636364	8.31460674157303	0.37603305785124	-1	-1	0	-1	-1	173.591549295775	0	0	-1	22849.5090909091	0	6.11764705882353	1.93004115226337	36.9563567362429	140.481203007519	0	99.1121495327103	16.5	126.941176470588	0
2015_21	14.710875331565	-1	-1	0	0	13.8620689655172	0	-1	-1	-1	-1	1.05351170568562	5530.16279069767	-1	0	-1	0	2.96774193548387	80.0350877192982	-1	-1	0	0	0	0	-1	0	11.0344827586207	0.650602409638554	-1	-1	0	-1	-1	-1	0	-1	-1	24924.7770700637	0	6.17647058823529	1.97609561752988	-1	138.039735099338	0	86.5344827586207	9.02255639097744	0	0
2015_22	12.3	-1	-1	0	-1	18.16	0	-1	-1	-1	-1	1.3228021978022	5906.32	-1	2.6046511627907	-1	-1	3.40425531914894	48.9	0	-1	0	0	-1	0	-1	1.42857142857143	4.90384615384615	0.166666666666667	-1	-1	0	-1	0	-1	0	-1	-1	5609.75362318841	-1	1.11111111111111	2.38490566037736	-1	61.1014492753623	0	88.4745762711865	12.5538461538462	-1	0
2015_23	20.0315533980583	-1	-1	0	-1	0	0	-1	-1	-1	-1	0.589473684210526	4981.728	-1	1.5	-1	-1	1.98837209302326	0	-1	-1	0	0	-1	0	-1	-1	7.09411764705882	0.101351351351351	-1	-1	0	-1	-1	-1	-1	-1	-1	12446.7182320442	0	1.05263157894737	2.27586206896552	-1	62.4461538461538	0	189.948186528497	9.58260869565217	0	-1
2015_24	22.5472972972973	-1	-1	0	-1	12	0	-1	0	-1	-1	1.29536921151439	3019.6992481203	-1	1.425	-1	-1	6.40677966101695	0	-1	-1	8.2	974.166666666667	0	0	-1	-1	8.4	0.0909090909090909	-1	-1	-1	-1	-1	-1	-1	-1	-1	19068.406779661	-1	0	7.11475409836066	-1	48.609022556391	0	350.533864541833	8.42857142857143	0	-1
2015_25	25.8498985801217	-1	-1	0	-1	36	0	-1	-1	-1	-1	2.39936440677966	3973.45588235294	-1	4.36363636363636	-1	-1	2.23636363636364	46.5	-1	-1	0	0	-1	0	-1	-1	6.08695652173913	0.170731707317073	-1	-1	0	-1	-1	-1	-1	-1	-1	9558.60759493671	-1	1.46666666666667	12.9120879120879	-1	45.0760869565217	0	379.488	4.87826086956522	0	-1
2015_26	34.1525773195876	-1	-1	0	-1	0	0	-1	0	-1	-1	2.99347623485555	3757.96992481203	-1	3.85714285714286	-1	-1	1.90909090909091	0	0	-1	0	434.5	0	0	-1	-1	4.9	0.103448275862069	-1	-1	0	-1	0	-1	-1	-1	-1	18426.7532467532	-1	0	15.7855530474041	-1	27.5268817204301	0	468.92125984252	5.39325842696629	0	-1
2015_27	53.3554817275748	-1	-1	0	-1	11.04	0	-1	-1	-1	-1	5.01503759398496	2238.82677165354	-1	10.75	-1	-1	1	0	-1	-1	12.8571428571429	742	-1	0	-1	-1	5.8252427184466	0	-1	-1	0	-1	-1	-1	0	-1	-1	21170.119760479	-1	0	33.8009049773756	-1	10.1489361702128	0	488.571428571429	8.54545454545454	0	-1
2015_28	47.7723577235772	-1	-1	0	-1	15.3658536585366	0	-1	-1	-1	-1	8.32361963190184	2357.50393700787	-1	10.0779220779221	-1	-1	5.46	0	-1	-1	0	0	-1	0	-1	-1	1.86046511627907	0.0275229357798165	-1	-1	0	-1	-1	-1	-1	-1	-1	15228.4	-1	0	66.5153473344104	-1	16.5283018867925	0	471.894273127753	6.92553191489362	0	-1
2015_29	48.0946372239748	-1	-1	0	-1	23.2727272727273	0	-1	-1	-1	-1	4.06265457543281	2479.13114754098	-1	12.20625	-1	-1	4.28571428571429	0	-1	-1	0	0	0	0	-1	-1	4	0.0818181818181818	-1	-1	0	-1	-1	-1	-1	-1	-1	8057.59090909091	-1	0	139.452768729642	-1	18.0813953488372	0	449.443243243243	6.13333333333333	0	-1
2015_30	54.7058823529412	-1	-1	0	-1	0	0	-1	-1	-1	-1	7.31022408963585	3880.859375	-1	16.3351063829787	-1	-1	2.53333333333333	0	-1	-1	0	0	-1	0	-1	-1	6.31578947368421	0.0196078431372549	-1	-1	0	-1	-1	-1	-1	-1	-1	26563.9672131148	-1	0	157.946902654867	-1	20.6428571428571	0	306.165517241379	3.93846153846154	0	-1
2015_31	60.2788203753351	-1	-1	-1	-1	15.8823529411765	0	-1	-1	-1	-1	8.16706443914081	4586.69172932331	-1	10.008658008658	-1	-1	0.82051282051282	0	-1	-1	0	781	0	0	-1	-1	4.63157894736842	0	-1	-1	-1	-1	-1	-1	-1	-1	-1	15982.6378378378	-1	0	134.319488817891	-1	34.9846153846154	0	256.705882352941	6.4	0	-1
2015_32	88.2726063829787	-1	-1	-1	-1	32.375	0	-1	-1	-1	-1	12.7789799072643	4078.28	-1	16.2995594713656	-1	-1	1.09090909090909	63.3913043478261	-1	-1	0	0	-1	0	-1	-1	6.87323943661972	0.00925925925925926	-1	-1	-1	-1	-1	-1	-1	-1	-1	4437.10948905109	-1	1.6	186.514285714286	-1	20.5961538461538	0	228.335820895522	1.5	0	-1
2015_33	84.6347607052897	-1	-1	-1	-1	0	0	-1	-1	-1	-1	22.585128561501	5480.63970588235	-1	6.8310502283105	-1	-1	1.10810810810811	-1	0	-1	0	0	-1	0	-1	-1	8.4375	0.0196078431372549	-1	-1	-1	-1	0	-1	-1	-1	-1	22992.4705882353	-1	0	183.544434050514	-1	-1	-1	156.560810810811	2.85915492957746	0	-1
2015_34	141.133714285714	-1	-1	0	-1	18.9090909090909	0	-1	-1	-1	-1	33.3262032085561	5038.43283582089	-1	8.16528925619835	-1	-1	0	0	0	-1	0	371.5	-1	0	-1	-1	12.679012345679	0	-1	-1	-1	-1	0	-1	-1	-1	-1	14075.1336898396	-1	0	163.214814814815	-1	3.10204081632653	-1	101.25	0.526315789473684	0	-1
2015_35	85.9665427509294	-1	-1	0	-1	8.21739130434783	0	-1	-1	-1	-1	49.5673289183223	4722.69863013699	-1	4.18032786885246	-1	-1	0	0	0	-1	0	0	-1	0	-1	-1	-1	0	-1	-1	-1	-1	-1	-1	-1	-1	-1	11621.4868421053	0	0	138.216636197441	-1	13.0357142857143	-1	31.5289256198347	0.803571428571428	0	-1
2015_36	79.3178717598908	-1	-1	0	-1	7.55555555555556	0	-1	-1	-1	-1	40.2816057519473	5553.05333333333	-1	2.7112676056338	-1	-1	0	0	-1	-1	0	1289.4	-1	0	-1	-1	11.8571428571429	0	-1	-1	-1	-1	-1	-1	-1	-1	-1	11821.0350877193	207.25	0	124.816901408451	-1	11.6307692307692	-1	38.6241134751773	0.307692307692308	0	-1
2015_37	67.0055632823366	-1	-1	-1	-1	18.5	0	-1	-1	-1	-1	50.6224627875507	5225.00613496933	-1	2.91666666666667	-1	-1	1.06666666666667	0	-1	-1	0	0	-1	0	-1	-1	10.2385321100917	0.142857142857143	-1	-1	-1	-1	-1	-1	-1	-1	-1	10453.8662790698	-1	1.04	120.857440166493	-1	26.4576271186441	-1	5.36153846153846	0.421052631578947	0	-1
2015_38	60.0027397260274	-1	-1	0	-1	7.13793103448276	0	-1	-1	-1	-1	55.6677966101695	6445.99431818182	-1	4.79487179487179	-1	-1	0	0	-1	-1	0	0	-1	0	-1	-1	10.8952380952381	0	-1	-1	0	-1	-1	-1	-1	-1	-1	8701.50753768844	0	0	66.6578073089701	-1	5.22	-1	10.9465648854962	0.22	0	0
2015_39	57.2558823529412	-1	-1	0	0	17.5454545454545	0	-1	-1	-1	-1	37.978021978022	6208.1797752809	-1	6.84210526315789	-1	-1	0.75	0	-1	-1	0	447.894736842105	-1	0	-1	-1	12.0714285714286	0.253164556962025	-1	-1	-1	-1	-1	-1	-1	-1	-1	26761.5101214575	-1	0	70.8050632911392	-1	5.07777777777778	-1	7.04210526315789	0	0	0
2015_40	31.9939759036145	0	-1	0	0	21	-1	-1	-1	-1	0.434936375603335	18.5619128949616	7448.57142857143	-1	2.94202898550725	-1	0.0304347826086957	0	114.466666666667	0	58.4821428571429	0	301.25	-1	-1	0	0.0666666666666667	8.9126213592233	0.251908396946565	0.688311688311688	-1	0	-1	0	0	0	0	-1	10602.7699530516	0	6.73684210526316	33.5130890052356	5.69271758436945	61.7	-1	0	0.375	202.571428571429	0.0833333333333333
2015_41	14.4067796610169	0	-1	0	0	32	-1	-1	-1	-1	0.470055754679411	25.0269799825936	7431.05084745763	-1	2.20359281437126	-1	0.285714285714286	0	0	0	233.840163934426	0	459.118644067797	-1	-1	0	0	9.4	0.0611111111111111	2.14457831325301	-1	0	-1	0	0	0	0	-1	19083.8745980707	168.857142857143	5.68421052631579	-1	2.77883959044369	70.4	-1	0	0.432432432432432	0	0
2015_42	14.7389162561576	0	-1	0	4.33333333333333	6.52941176470588	-1	-1	-1	-1	0.44716044632551	19.2918660287081	10447.8117647059	-1	1.06666666666667	-1	0.125	0	83.2972972972973	0	105.434015525759	0	201.954545454545	-1	-1	0	0	5.078125	0	0.839622641509434	-1	0	-1	0	0	-1	0	-1	11649.9417808219	0	3.25	-1	2.79110251450677	85.9716312056738	-1	0	0	109.828571428571	0.0111111111111111
2015_43	6.11602209944751	0	-1	0	2.66666666666667	8	-1	-1	0	7.24137931034483	0.156332996292551	18.698224852071	8532.20809248555	-1	1.22033898305085	0	0.388278388278388	1.25806451612903	0	0	41.6382846488502	0	0	-1	-1	0	0	15.0243902439024	0.0789473684210526	0	-1	0	-1	0	20.8545454545455	0	0	-1	17793.8953846154	126.6	0	-1	4.23704954954955	110.254716981132	-1	0	0.241379310344828	0	0
2015_44	4.24285714285714	9.95454545454546	-1	0	7.66666666666667	17.7	-1	-1	0	11.6470588235294	0.343161094224924	10.6265466816648	8546.8	0	1.43119266055046	155.166666666667	0.598130841121495	0.871794871794872	50.8695652173913	0	109.391862955032	0	187.661290322581	-1	-1	0	0	11.3785714285714	0.096969696969697	5.65040650406504	-1	0	-1	0	16.3965517241379	0	0	-1	14041.749271137	0	1.26666666666667	-1	12.6691042047532	75.4468085106383	0	0	0	0	0.0506329113924051
2015_45	4.79651162790698	0	-1	-1	6.25	0	-1	-1	0	5.41935483870968	0.263990117356393	9.02479338842975	9284.45731707317	0	1.63934426229508	0	0.574132492113565	3.08108108108108	68.8333333333333	0	77.9839172889144	0	314.184210526316	-1	-1	89.5625	0	3	0.246913580246914	2.49655172413793	-1	701.761904761905	-1	0	0	0	0	-1	20946.0235294118	0	6.58064516129032	-1	23.0134916351862	80.8305084745763	0	7.91860465116279	0	143.346153846154	0.0222222222222222
2015_46	4.93589743589744	8.73913043478261	-1	0	7	26.4	-1	-1	0	9.06666666666667	0.446428349393845	8.42420212765957	9967.45283018868	0	5.48648648648649	86.4761904761905	0.660766961651917	2.37931034482759	151.947368421053	0	48.4266495836003	0	924.987341772152	-1	-1	0	0	5.5679012345679	0.110599078341014	1.77339901477833	0	551.77358490566	-1	0	0	0	0	-1	13767.3432835821	0	6.63414634146342	-1	36.396668401874	139.409282700422	0.35	0	0	590.2	0
2015_47	1.24832214765101	19.6575342465753	-1	0	17	18.4545454545455	-1	-1	0	7.59259259259259	0.614289185905225	5.18777292576419	10489.5704697987	0	2.66265060240964	194	0.906344410876133	0	48.1739130434783	0.260869565217391	47.8177943526905	0	664.606741573034	-1	-1	0	0	-1	0.393103448275862	0	0	1507.16129032258	-1	0	22.1111111111111	0	0	-1	21498.3783783784	0	2.36363636363636	-1	50.5170731707317	195.687150837989	0.642857142857143	0	0	0	0.0638297872340425
2015_48	1.53846153846154	25.5483870967742	-1	0	0	8.47058823529412	-1	-1	0	8.52173913043478	0.256543624161074	1.82857142857143	10778.5563380282	-1	6.30985915492958	283.947368421053	1.4300518134715	0	69.3214285714286	0.4	38.1691449814126	0	126.135416666667	-1	-1	0	0	28	0.29126213592233	16.1295336787565	7.27891156462585	1416.78225806452	-1	0	0	0	36.3333333333333	-1	16371.3625592417	0	4.54385964912281	-1	64.9721407624634	180.286919831224	1.61016949152542	0	0.226415094339623	147.590909090909	0.117647058823529
2015_49	2.40752351097179	23.4084507042254	-1	0	6.2	10.2857142857143	-1	-1	0	8.08823529411765	0.176267862146259	1.82564102564103	8614.80597014925	0	3.25352112676056	0	4.28531855955679	4.92307692307692	0	11.7857142857143	145.867572156197	8.14285714285714	655.268817204301	-1	-1	0	0	17.6170212765957	1.05921052631579	4.25943396226415	43.6279069767442	1372.90476190476	-1	286.222222222222	15.0923076923077	0	7.16666666666667	-1	21906.3184079602	145.6	11.5070422535211	-1	82.8915662650602	141.145945945946	9.14814814814815	7.44117647058824	0.55	124.107142857143	0.289473684210526
2015_50	2.93243243243243	40.4782608695652	-1	0	15	29.8823529411765	-1	-1	0	24.64	0.380827028437255	1.12903225806452	7993.33333333333	0	3.37078651685393	265	4.23160173160173	4.42647058823529	0	3.75	185.503703703704	4.02777777777778	977.591397849462	-1	-1	0	0	4	1.04248366013072	32.967032967033	23.84	5701.90217391304	-1	139.608695652174	13.328125	0	0	-1	44042.0689655172	0	12.144578313253	-1	121.051884880422	277.005128205128	12.1764705882353	18.6774193548387	0	361.485714285714	0.214285714285714
2015_51	0.940959409594096	38.7207207207207	-1	0	7.57894736842105	12.2222222222222	-1	-1	202	12.9655172413793	0.722691253426364	1.41387024608501	6598.73333333333	0	2.52083333333333	105.52	3.88139059304703	4.68	0	52.9411764705882	346.304995038042	0	1136.33333333333	-1	-1	0	0	12.6274509803922	2.74015748031496	132.829268292683	49.0318181818182	1253.94594594595	-1	540.333333333333	40.6119402985075	2.35294117647059	19.6666666666667	-1	44809.4936061381	134.769230769231	15.675	-1	176.631150573437	214.134275618375	11.5744680851064	0	0.208333333333333	0	0.255707762557078
2015_52	1.22815533980583	-1	-1	0	5.57142857142857	15.5	-1	-1	0	4.15686274509804	1.37397871116226	0.630225080385852	3378.05309734513	11.0526315789474	1.3953488372093	76	0.23696682464455	1.53061224489796	50.5111111111111	26.6666666666667	319.16592920354	24.2307692307692	1074.14285714286	-1	-1	0	0.05	-1	1.064	304.872340425532	138.723404255319	2490.4	-1	729.710526315789	12.5245901639344	9.66666666666667	7.76923076923077	-1	65034.7767857143	59.9565217391304	10.3676470588235	-1	184.841490794791	335.004405286344	-1	0	0	337.95	0.303317535545024
2015_53	-1	-1	-1	566.392857142857	9.71428571428571	32.5	-1	-1	0	-1	-1	1.18604651162791	-1	13.1052631578947	0.848484848484849	80.0909090909091	1.84466019417476	4.05882352941177	346.458333333333	40.6666666666667	366.761603375527	68	1197.29166666667	-1	-1	0	0.363636363636364	-1	3.02931596091205	781.297297297297	66.9401709401709	4332.55102040816	-1	978.5	24.65	54.1666666666667	0	-1	60219.3050847458	-1	12.4242424242424	-1	190.610919822922	285.035294117647	7.25490196078431	-1	0.307692307692308	404.55	1.96587030716724
2016_01	2.025	52.3243243243243	1.51612903225806	2239.275	20	82.6666666666667	-1	-1	1224.54545454545	9.81818181818182	1.66266244647179	0.32345013477089	8425.95348837209	18.8059701492537	1.82608695652174	179.703703703704	5.10054844606947	3.69230769230769	407.619047619048	136.125	1173.60999691453	77.6363636363636	1732.17647058824	-1	-1	0	1.04347826086957	21.8148148148148	27.6427015250545	1198.50458715596	104.021505376344	4601.2027027027	-1	1297.03225806452	151.646017699115	57.6	34.1176470588235	57.1111111111111	104158.31130064	381.694444444444	26.8069306930693	-1	357.2956929873	283.066860465116	5.79020979020979	33.1290322580645	0.463414634146341	70.2105263157895	5.34464751958224
2016_02	2.66942148760331	63.3333333333333	1.34020618556701	4735.47445255474	69	0	-1	-1	744.307692307692	5.4	0.879115710253998	0.506172839506173	9662.04301075269	93.1267605633803	0.529411764705882	281.785714285714	10.2809364548495	4.83582089552239	263.244680851064	209.391304347826	2001.85044187627	68.6341463414634	3009.83050847458	-1	-1	851.852760736196	1.93548387096774	32.2424242424242	29.4592274678112	1419.67963386728	367.727810650888	10528.0545454545	-1	2353.84615384615	433.526785714286	107.59375	15.6315789473684	45.5	126041.76	761.25	30.1456310679612	-1	400.051753881541	225.559566787004	3.94444444444444	110.104166666667	5.16923076923077	378.274509803922	5.37254901960784
2016_03	0.931506849315068	102.956298200514	2.84375	10258.6944444444	51.0714285714286	68.0869565217391	-1	-1	1319.60655737705	11.3461538461538	1.95947817836812	0.454849498327759	10230	196.225806451613	0.526315789473684	570.3	23.302752293578	5.63855421686747	722.48275862069	354.744186046512	6952.33439490446	129.469879518072	4926.83098591549	-1	-1	179.615384615385	8.46511627906977	41.9540229885057	51.1945392491468	1700.2932166302	647.6726342711	15779.5197132616	-1	3015.01886792453	526.132075471698	736.225352112676	30.8965517241379	14.96	180693.090247453	551.494736842105	69.2293233082707	-1	723.061514683153	182.424242424242	20.0322580645161	77.0666666666667	1.57894736842105	428.082191780822	6.94716242661448
2016_04	1.03271028037383	156.992509363296	1.77272727272727	33949.717884131	165.979166666667	66.6176470588235	-1	-1	1155	5.55555555555556	5.70316703558658	0.273684210526316	7896.23300970874	368.270718232044	2.00925925925926	1214.12121212121	45.691026827012	12.4526315789474	-1	444.040816326531	22959.7422680412	128.767123287671	7880.24516129032	-1	-1	516.738095238095	-1	47.7391304347826	77.6843657817109	1501.94607843137	1556.00700525394	12524.6651884701	-1	3270.10256410256	566.348561759729	3324.83850931677	48.2553191489362	76.0344827586207	235454.2695962	1330.13333333333	82.1288659793814	-1	1335.77223873771	195.591240875912	35.595041322314	19.5	1.2972972972973	1761.30612244898	5.67216117216117
2016_05	1.46808510638298	190.307167235495	2.45614035087719	28707.8125	212.153846153846	89.6	-1	-1	1305.91304347826	7.56521739130435	15.5156313993174	0.285714285714286	6207.87735849057	655.338983050847	0.909090909090909	2050.1	76.5565217391304	13.9655172413793	2477.85386221294	352.34375	34998.8976173626	105.8	7016.77348066298	-1	-1	759.333333333333	34	16.8905109489051	72.3685756240822	1443.72104018913	2063.64705882353	11192.731610338	-1	2419.80357142857	645.60263653484	3501.38596491228	75.2033898305085	72.9	261267.156462585	634.205607476635	103.324937027708	-1	1649.69123095924	205.186602870813	12.8440366972477	70.75	3.92156862745098	2406.87	5.7196261682243
2016_06	2.61904761904762	271.611666666667	1.6258064516129	30359.3333333333	267.28813559322	39.5	-1	-1	2229.51219512195	4.15384615384615	12.6443584814993	0.276595744680851	6751.90384615385	804.400809716599	3.45454545454545	1462.70967741935	104.583872866392	16.5036496350365	2038.17082533589	487.805555555556	43240.421500218	109.603448275862	7823.81347150259	-1	-1	3308.79518072289	43.943661971831	30.8360655737705	60.6217616580311	1011.95070422535	2026.59356376639	9843.30578512397	-1	1963.78947368421	564.083832335329	1484.96788990826	42.5185185185185	114.090909090909	327437.29847144	944.197530864197	95.6415094339623	-1	1965.74152542373	103.529411764706	16.0540540540541	53.1219512195122	4.26530612244898	2445.88625592417	7.19496855345912
2016_07	2.375	203.694174757282	1.06666666666667	23794.3812154696	324.090909090909	35.35	-1	-1	1946.69565217391	7.77272727272727	11.9477730266959	0.775919732441472	6488.47058823529	1333.54666666667	1.18181818181818	2358.85714285714	83.1521739130435	17.5	1624.12266112266	466.516129032258	54560.7632324112	70.125	9308.90950226244	-1	-1	3431.06470588235	124.201438848921	33.6521739130435	64.9508670520231	540	2314.85755813953	7463.3064516129	-1	830.760869565217	539	2054.28169014085	51.1298701298701	133.411764705882	425286.651218063	731.214285714286	132.606407322654	-1	2111.23993558776	143.627906976744	12.8780487804878	16.5609756097561	5	3309.35294117647	7.33665338645418
2016_08	3.02166064981949	236.530612244898	2.08333333333333	23006.0824949698	481.245283018868	55	-1	-1	1264.45	7.43478260869565	16.9826622799217	0.566037735849057	6258.43243243243	1228.8813559322	1.39423076923077	2440.11235955056	133.201392608463	13.3333333333333	-1	476.769230769231	58138.5412381529	49.0909090909091	11165.5708661417	-1	-1	2154.52488687783	101.832061068702	89.6732026143791	53.3609467455621	253.688271604938	3005.23616734143	4488.18264840183	-1	273.767441860465	499.603938730853	620.055248618785	90.4444444444444	94.2352941176471	472748.478695933	781.388059701493	108.484162895928	-1	2280.08109743797	125.450511945392	10.7692307692308	0	5.84375	4169.85823754789	3.52164948453608
2016_09	3.64900662251656	205.244107744108	2.30113636363636	19668.2725060827	461.25	98	-1	-1	925.391304347826	5.66666666666667	21.6985693263571	0.468354430379747	5375.52631578947	1466.38709677419	1.91666666666667	2288.91358024691	131.772067039106	17.03125	1297.95633187773	87.5	65197.8300411523	42	11079.928057554	-1	-1	2638.18378378378	127.416666666667	39.50625	27.7523659305994	98.2204724409449	2428.40445859873	3695.25	-1	146.8	500.377358490566	809.476744186047	63.6140350877193	111.212121212121	414938.954081633	802.478873239437	111.155606407323	-1	2126.88538035678	202.205607476635	3.29411764705882	83.1176470588235	5.94285714285714	2978.59960745829	2.36660268714012
2016_10	2.83802816901408	179.648648648649	3.98837209302326	13192.4301075269	507.5	99.1666666666667	-1	-1	985.026315789474	10.1666666666667	27.2216539086059	1.27105263157895	6766.96062992126	1155.64377682403	0.76	2270.61904761905	104.426787741203	23.1388888888889	-1	128.5	81924.772906711	24.2142857142857	10904.3636363636	-1	-1	2370.58771929825	84.603305785124	42.6906474820144	21.0071942446043	30.4615384615385	2258.98076923077	186.975	-1	0	540.790697674419	544.881355932203	73.0576923076923	171.2	335062.742203742	383.25	98.9425837320574	-1	1590.25112815884	172.15	0.592592592592593	16.2758620689655	11.3648648648649	2226.44494892168	1.24711316397229
2016_11	1.90311418685121	184.582043343653	1.66666666666667	12646.7124183007	333.509433962264	83.72	-1	-1	1377.61363636364	5.03571428571429	16.8411467673431	1.31368421052632	4140.58823529412	1016.95708154506	0.292682926829268	1601.57333333333	95.9790454016298	27.1190476190476	766.783707865169	0	96332.5325562701	25.75	10603.5860655738	-1	-1	878.329411764706	71.1346153846154	80.5606936416185	10.0136054421769	20.2613065326633	1879.02152641879	1160.3064516129	-1	0	498.366576819407	344.911392405063	81.2307692307692	127.08	247947.519523494	644.323529411765	66.3586005830904	-1	1505.04519493419	152.909090909091	0.6	20.551724137931	10.6455696202532	2152.0125984252	2
2016_12	2.91449814126394	59.04	2.75409836065574	9309.32515337423	227.0625	96.1578947368421	-1	-1	1316.33333333333	1.73913043478261	13.0822778257118	1.30612244897959	3048.06338028169	806.333333333333	0.25	1335.47826086957	35.9841966637401	27.225	565.848739495798	82	80276.7231663685	14.8421052631579	10052.8047337278	-1	-1	965.487804878049	43.2	45.5972222222222	9.92268041237113	9.37888198757764	1192.46559633028	-1	-1	0	372.932551319648	232.714285714286	40.6304347826087	201.739130434783	142639.697986577	260.444444444444	39.8681818181818	-1	505.637626262626	150.446078431373	1.3	31.2758620689655	7.36842105263158	1437.5884244373	0.819148936170213
2016_13	1.87900355871886	13.4519572953737	3.98165137614679	-1	-1	54	-1	-1	1243.8064516129	1.92	12.772311542697	0.719836400817996	3382.91411042945	611.392405063291	0.41025641025641	967.354838709677	14.8233046800382	21.1428571428571	488.129963898917	33.6	47376.906080207	44.5	7142.63157894737	-1	-1	603.552631578947	16.1311475409836	46.2627118644068	3.49698795180723	14.6511627906977	917.666666666667	505.278846153846	-1	0	383.449541284404	154.761904761905	70.4	110.25	146436.688039457	268.606060606061	40.7380952380952	-1	626.545219638243	126.645569620253	0	53.8526315789474	10.1282051282051	1902.19266055046	0.616724738675958
2016_14	4.53947368421053	10.2844036697248	10.6187845303867	9649.31707317073	26.9230769230769	45.25	-1	-1	935.181818181818	6.30769230769231	6.20911098527746	0.962671905697446	4875.55555555556	364.251497005988	1.3469387755102	849.745454545454	12.6489361702128	22.9933774834437	434.425531914894	42.2222222222222	20803.8875255624	27	6018.40601503759	-1	-1	267.368421052632	16.4324324324324	82.1052631578947	3.65646258503401	3.20192307692308	422.177606177606	592.178217821782	-1	0	222.45652173913	40.3846153846154	30.7446808510638	177.222222222222	135984.629981025	616.777777777778	39.9259259259259	-1	476.357165255566	141.942477876106	0	43.8425925925926	7.38686131386861	1027.58306188925	0.363636363636364
2016_15	3.86725663716814	-1	2.99029126213592	6278.44370860927	6.28571428571429	61.6666666666667	-1	-1	1573.125	1.39130434782609	11.7022952615722	1.11196911196911	3984.72928176796	-1	1.02702702702703	275.372881355932	6.73837209302326	50.0873786407767	433.588495575221	-1	6536.9032597266	38.3333333333333	4096.23529411765	-1	-1	174.25	18.9302325581395	91.5555555555556	2.08333333333333	-1	251.416267942584	-1	-1	0	216	74.25	26.25	161.777777777778	124077.558659218	225.942857142857	27.025	-1	314.441311244272	123.910447761194	1.25	61.0521739130435	4.4258064516129	668.757763975155	0.161676646706587
2016_16	2.13897280966767	-1	13.9701492537313	5890.125	8.66666666666667	20.7	-1	-1	724.333333333333	4.28571428571429	6.69009209888512	1.0327868852459	5784.69346733668	37.7349397590361	0.381818181818182	397.586206896552	3.62948960302457	50.9090909090909	272.265625	-1	2422.85441941075	5.5	1526.9375	-1	-1	161	3	45.4545454545455	1.51807228915663	-1	124.349593495935	1667.36842105263	-1	0	132.266666666667	37.1904761904762	15.2727272727273	125.7	120353.390581717	760	20.2173913043478	-1	217.030726256983	84.4532710280374	1.40540540540541	39.0847457627119	4.44915254237288	657.58	0.188888888888889
2016_17	2.15141955835962	-1	21.3740458015267	6497.18181818182	0	22.9230769230769	-1	-1	0	8.5	5.37631519699812	3.03677758318739	4757.21428571429	53.3513513513513	0.555555555555556	211.111111111111	2.18336886993603	54	301.464052287582	39.5	874.942258883249	-1	1456.61538461538	-1	-1	75.6363636363636	2.87179487179487	53.08125	0.967592592592593	-1	-1	0	-1	0	213.407407407407	29	12.625	103.2	68935.8531468531	387.75	9.14285714285714	-1	168.948698017878	122.984455958549	1.58333333333333	61.5	5	330.12	0
2016_18	3.2979274611399	-1	25.8650306748466	11326.0759493671	0	15.8857142857143	-1	-1	0	2.30769230769231	3.30052641765047	2.38533541341654	12325.927184466	-1	0.969230769230769	98.875	1.45658263305322	43.9166666666667	286.137931034483	-1	-1	9.5	1644.25	-1	-1	80	2.37037037037037	31.5494505494505	0.811059907834101	-1	-1	0	-1	-1	108.968421052632	21	0	69.5454545454545	59083.0622009569	580.875	7.09090909090909	-1	90.1032608695652	-1	0	78.4655172413793	5.37209302325581	130.227272727273	0.154545454545455
2016_19	4.05952380952381	-1	-1	6845.21739130435	0	23.1818181818182	-1	-1	0	10.8695652173913	3.58589671564391	5.52238805970149	16747.963800905	30.75	2.91428571428571	43.7058823529412	1.01734104046243	48.576	67.3714285714286	0	-1	0	1527.08333333333	-1	-1	0	0.6	42.9699248120301	0.645739910313901	-1	-1	-1	-1	-1	222	0	0	36.7692307692308	28121.0980392157	0	7.5	-1	87.1267190569745	-1	-1	285.497206703911	1.76	88.2173913043478	0.711864406779661
2016_20	9.21158129175947	-1	22.75	3486.48101265823	-1	6.36842105263158	-1	-1	0	1.36	2.83701355152135	5.34002509410289	17464.3459915612	0	2.5	-1	0.275	51.25	63.1594202898551	0	-1	9.77777777777778	394.222222222222	-1	-1	0	2.14285714285714	38.296875	0.121827411167513	-1	-1	0	-1	-1	137.148148148148	0.928571428571428	-1	103.090909090909	52234	550.125	7	-1	11.2607449856734	-1	0.333333333333333	371.49710982659	0.808823529411765	0	0
2016_21	3.36282194848824	-1	30.7265625	1611.15789473684	-1	12.6315789473684	-1	-1	0	6	0.151637717121588	5.69509345794393	21678.53125	-1	4.0625	-1	-1	35.1541666666667	0	-1	-1	21	0	-1	-1	-1	0	23.6619718309859	0.0256410256410256	-1	-1	-1	-1	0	-1	0.0909090909090909	-1	22.4545454545455	32890.3987730061	407.428571428571	0	-1	-1	-1	0	575.378378378378	-1	0	0
2016_22	6.67488262910798	-1	27.2432432432432	1827.72413793103	4	7	-1	-1	0	11.25	1.26150627615063	5.47896150402865	22217.6	-1	2.08771929824561	-1	-1	30.7066666666667	80.7916666666667	-1	-1	0	0	-1	-1	-1	0	15.2727272727273	0.0101010101010101	-1	-1	-1	-1	-1	-1	-1	-1	64.2352941176471	22363.0379746835	0	5	-1	-1	-1	-1	475.602739726027	-1	209.142857142857	1
2016_23	5.56171284634761	-1	31.933734939759	-1	-1	0	-1	-1	0	11.28	0.670859872611465	7.00252312867956	26845.5241935484	-1	0.6875	-1	-1	20.4494382022472	0	-1	-1	0	0	-1	-1	-1	-1	47.1063829787234	0	-1	-1	-1	-1	-1	-1	0	-1	97.8947368421053	10139.4829931973	352.333333333333	2.625	-1	-1	-1	0	856.32380952381	-1	159.894736842105	1
2016_24	8.03755868544601	-1	15.7894736842105	0	-1	0	-1	-1	0	8	0.144839549002602	12.520325203252	27078.48	-1	2.6	-1	-1	14.6363636363636	0	0	-1	4.9	370.6875	-1	-1	-1	-1	28.3255813953488	0	-1	-1	0	-1	-1	-1	0	-1	83.5714285714286	26428.8505747126	0	0	-1	-1	-1	-1	1477.62557077626	-1	0	0
2016_25	8.53798767967146	-1	20.1739130434783	0	-1	0	-1	-1	0	12.375	0.392705410821643	15.4635352286774	24231.8842105263	-1	3.49206349206349	-1	-1	18.0555555555556	0	-1	-1	0	0	-1	-1	-1	-1	18.7532467532468	0.0634920634920635	-1	-1	0	-1	-1	-1	-1	-1	170.823529411765	20269.1666666667	0	3.125	-1	-1	-1	-1	979	-1	117.583333333333	0
2016_26	11.3170731707317	-1	8.47826086956522	216.675675675676	-1	26	-1	-1	0	14.90625	0.0987833511205976	21.6395209580838	22330.4268292683	-1	2.29310344827586	-1	-1	11.5809523809524	0	-1	-1	0	391.133333333333	-1	-1	-1	-1	6.51063829787234	0.0114285714285714	-1	-1	-1	-1	-1	-1	-1	-1	193.529411764706	6624.30769230769	0	1.35714285714286	-1	-1	-1	-1	446.256130790191	-1	-1	0
2016_27	12.7094594594595	-1	7.23809523809524	0	-1	50	-1	-1	0	18.2068965517241	0.126340909090909	30.142566191446	17167.7916666667	-1	2.33333333333333	-1	-1	10.3495145631068	0	-1	-1	0	0	-1	-1	-1	-1	2.5	0.0125786163522013	-1	-1	0	-1	-1	-1	-1	-1	157.5	9017.30472103004	0	0	-1	-1	-1	-1	640.355091383812	-1	126.888888888889	0
2016_28	17.8673061550759	-1	3.94285714285714	0	0	14.3529411764706	-1	-1	-1	20.6206896551724	0.126216216216216	44.5476304451891	15722.34375	-1	2.04166666666667	-1	-1	6.62068965517241	60.7857142857143	0	-1	0	0	-1	-1	-1	-1	9.70588235294118	0	-1	-1	0	-1	-1	-1	-1	-1	201.933333333333	5535.25423728814	23.2142857142857	0	-1	-1	-1	-1	524.801652892562	-1	104.555555555556	-1
2016_29	32.2361623616236	-1	15	-1	-1	61.1111111111111	-1	-1	-1	25.2903225806452	0.146497461928934	43.7429795335554	16270.1428571429	-1	1.95918367346939	-1	-1	7.20430107526882	31.0612244897959	0	-1	0	264.052631578947	-1	-1	-1	-1	4.33333333333333	0.0163934426229508	-1	-1	-1	-1	-1	-1	-1	-1	213.529411764706	24642.8461538462	0	1	-1	-1	-1	-1	143.837209302326	-1	0	-1
2016_30	37.584	-1	6.81081081081081	-1	-1	72.9444444444444	-1	-1	-1	29.6129032258065	0.0725874587458746	54.5010706638116	16283.264	-1	2.38636363636364	-1	-1	4.60714285714286	0	0	-1	0	0	-1	-1	-1	-1	8.93939393939394	0.0131578947368421	-1	-1	0	-1	-1	-1	-1	-1	237.190476190476	24417.4245283019	0	0	-1	-1	-1	-1	139.051282051282	-1	201.545454545455	-1
2016_31	50.0163934426229	-1	10.2736842105263	-1	-1	65.625	-1	-1	-1	27.5862068965517	0.0646316463805253	55.5242290748899	12840.8	-1	0.638297872340426	-1	-1	0	0	-1	-1	0	0	-1	-1	-1	-1	5.6	0.0206896551724138	-1	-1	0	-1	-1	-1	-1	-1	227.47619047619	19162.6206896552	0	0	-1	-1	-1	-1	138.466321243523	-1	0	-1
2016_32	64.689156626506	-1	5.83734939759036	-1	-1	60	-1	-1	-1	30.8571428571429	0.116580310880829	69.0588859416446	12375.3684210526	-1	1.8	-1	-1	0.723404255319149	0	0	-1	0	0	-1	-1	-1	-1	11.7051282051282	0	-1	-1	-1	-1	-1	-1	0	-1	240.684210526316	19802.128440367	0	0	-1	-1	-1	-1	101.428571428571	-1	0	-1
2016_33	84.5772839506173	-1	4.39024390243902	-1	-1	34.7692307692308	-1	-1	0	31.1111111111111	0.0667269643866591	47.5878413189078	13340.3739130435	-1	2.45	-1	-1	0.754716981132075	0	-1	-1	0	0	-1	-1	-1	-1	5.35384615384615	0.024	-1	-1	0	-1	-1	-1	-1	-1	226.416666666667	15329.2032520325	0	1.55555555555556	-1	-1	-1	-1	86.8467153284672	-1	0	-1
2016_34	71.2326913066111	-1	-1	-1	-1	49.5	-1	-1	-1	25.65	0.0541081081081081	45.2620320855615	15117.2941176471	-1	3	-1	-1	0.787878787878788	0	0	-1	0	356.076923076923	-1	-1	-1	-1	8.02702702702703	0.137931034482759	-1	-1	0	-1	-1	-1	-1	-1	158.526315789474	15518.4736842105	0	1.66666666666667	-1	-1	-1	-1	83.6307692307692	-1	0	-1
2016_35	66.8937242327073	-1	6.47058823529412	-1	-1	9.69230769230769	-1	-1	-1	23.6190476190476	0.00103114930182599	48.6832222895215	16361.6517857143	-1	4.80821917808219	-1	-1	2.2	0	0	-1	0	0	-1	-1	-1	-1	3.26785714285714	0	-1	-1	-1	-1	-1	-1	-1	-1	122.285714285714	6681.8	0	4.25	-1	-1	-1	-1	49.8611111111111	-1	175.636363636364	0
2016_36	71.5029693924166	-1	3.93063583815029	-1	-1	20.2222222222222	-1	-1	-1	28.1935483870968	0.0099079754601227	38.4949899799599	13252.8431372549	-1	5.76470588235294	-1	-1	0	0	0	-1	0	331.5625	-1	-1	-1	0	2.19607843137255	0.0410958904109589	-1	-1	-1	-1	-1	-1	0	-1	135.777777777778	15129.0420168067	0	6.25	-1	-1	-1	-1	75.4181818181818	-1	0	-1
2016_37	56.8062057702776	-1	0.40506329113924	-1	-1	15.5	-1	-1	-1	28.125	0.010718021873514	35.4554744525547	10354.1443298969	-1	4.4390243902439	-1	-1	0	0	0	-1	0	350.875	-1	-1	-1	1.03703703703704	1.42857142857143	0.162162162162162	-1	-1	0	-1	-1	-1	-1	-1	74.0769230769231	14844.3870967742	-1	4.5	-1	-1	-1	-1	63.3653846153846	-1	0	0
2016_38	36.4586129753915	-1	0.907692307692308	0	-1	0	-1	-1	-1	15.8888888888889	0.0166430260047281	19.9160613397902	13406.2941176471	-1	6.57692307692308	-1	-1	0.648148148148148	0	0	-1	0	0	-1	-1	-1	0.887323943661972	2.41176470588235	0.0280898876404494	-1	-1	-1	-1	-1	-1	0	-1	89.1428571428571	30429.5593220339	-1	2.6	-1	-1	-1	-1	95.2380952380952	-1	227.25	0
2016_39	20.9037958115183	-1	2.8125	0	-1	0	-1	-1	-1	14.1428571428571	0.0214487504527345	18.2146160962072	12302.6666666667	-1	4.01470588235294	-1	-1	0.754716981132075	0	0	-1	0	0	-1	-1	-1	1.06666666666667	9.15492957746479	0.465753424657534	-1	-1	0	-1	-1	-1	0	-1	134.727272727273	31007.3513513514	0	5.33333333333333	-1	-1	-1	-1	11.5795454545455	-1	0	0
2016_40	14.5460704607046	2.97727272727273	2.9010989010989	0	0	26.6666666666667	-1	-1	0	26.7272727272727	-1	19.98	11500.1818181818	-1	3.87096774193548	0	0.216606498194946	0	65.6458333333333	0	173.153580672994	0	0	0	-1	0	0	2.23636363636364	0.0542986425339367	0.851063829787234	-1	0	-1	0	0	0	0	35	21923.9489051095	206.333333333333	1.61538461538462	-1	4.70360598065084	-1	-1	70.4117647058823	-1	0	0
2016_41	11.0546282245827	0	0	0	0	26	-1	-1	0	21.9428571428571	-1	14.5819070904645	9818.90909090909	-1	2.94252873563218	-1	0	2.64	0	0	159.873563218391	0	0	-1	-1	0	0	7.60869565217391	0.0625	3.00884955752212	-1	0	-1	0	0	0	0	73.5	7157.12234042553	0	7.57142857142857	-1	5.64406779661017	-1	-1	65.4358974358974	-1	0	0
2016_42	5.44676979071884	5.5	1.07142857142857	0	0	87	-1	-1	0	34.5625	-1	8.71276595744681	9848.97087378641	0	2.14285714285714	-1	0.228882833787466	0	0	0.454545454545455	197.448504983389	0	0	0	-1	0	0	6.8433734939759	0.101694915254237	3.10185185185185	-1	0	-1	2593	0	0	0	48.6818181818182	12785.8563535912	0	2.30769230769231	-1	7.82725241995532	-1	-1	34.8695652173913	-1	0	0.0161290322580645
2016_43	3.06502463054187	0	2.36	0	0	81	-1	-1	136.736842105263	12.5	-1	5.92088197146563	8836.85593220339	0	2	0	1.39130434782609	0	0	9.375	111.224719101124	0	283.454545454545	0	-1	0	0	4.0655737704918	0.0841423948220065	0	-1	186.126436781609	-1	673.714285714286	0	0	0	162	18527.8306878307	1770	2.95652173913043	-1	24.940133037694	-1	-1	0	-1	0	0.0588235294117647
2016_44	3.45784418356457	4.69090909090909	0.464285714285714	0	0	31.0909090909091	-1	-1	0	16.8648648648649	-1	2.80612244897959	9100.32110091743	0	0.860215053763441	46.7368421052632	0.278617710583153	0	0	0	371.841406768414	0	0	0	-1	0	0	2.67272727272727	0.0779220779220779	4.11267605633803	-1	889.759036144578	-1	231.52380952381	0	0	0	111.681818181818	11418.0769230769	594	3.63636363636364	-1	45.9293333333333	-1	-1	10.3333333333333	-1	104.333333333333	0.488372093023256
2016_45	1.85034013605442	6.7741935483871	0.490909090909091	0	0	8.27272727272727	-1	-1	0	20.3571428571429	-1	2.56	8383.2523364486	0	1.61290322580645	0	0.451143451143451	0	0	0	346.6696485623	0	237.060869565217	29.9655172413793	-1	0	0	2.23076923076923	0.424778761061947	4.73821989528796	-1	2244.92307692308	-1	781.714285714286	39.2203389830508	0	0	108.947368421053	16232.4314868805	870.918918918919	3.30985915492958	-1	64.1035714285714	-1	-1	22.4533333333333	-1	120.923076923077	0.342857142857143
2016_46	1.66844919786096	3.3	0.351351351351351	0	0	34.125	-1	-1	0	9	-1	3.31450094161959	7629.75221238938	0	0.636363636363636	40.1578947368421	0.318181818181818	1.82142857142857	0	16	572.726363181591	39.2857142857143	702.434782608696	0	-1	0	0	0.9	0.985714285714286	3.55348837209302	72.8	863.55612244898	-1	1451.5	12.5820895522388	0	13.5714285714286	26.0740740740741	23171.1526946108	994.666666666667	20.0090909090909	-1	124.313714285714	-1	-1	7.79120879120879	-1	0	1.45283018867925
2016_47	1.34534534534535	11.9029850746269	0.381679389312977	0	13.1428571428571	23.4285714285714	-1	-1	0	17.8125	-1	1.27574171029668	8497.07079646018	0	0.333333333333333	0	1.1118760757315	0	166.243902439024	66.5454545454545	880.842648323302	19.5	1140.28057553957	0	-1	0	0	6.125	0.634560906515581	-1	157.164556962025	1754.91847826087	-1	192.619047619048	53.3636363636364	0	68.5714285714286	0	11977.7577319588	1161.78723404255	5.30985915492958	-1	215.044295302013	-1	-1	11.3488372093023	-1	0	2.7363184079602
2016_48	1.18022328548644	13.251572327044	0.471698113207547	4880.13861386139	2.42857142857143	0	-1	-1	0	7.07692307692308	-1	0.952029520295203	9476.92561983471	4.72222222222222	0	102	1.42378559463987	0	372.380952380952	67.7272727272727	2231.30319148936	96.88	215.654676258993	0	-1	0	0.823529411764706	4.09090909090909	3.34285714285714	48.2804054054054	320.03125	2486.952	-1	8217.38679245283	50.0571428571429	11.75	0	36.5	21262.8625592417	1913.79310344828	8.68156424581006	-1	357.938659058488	-1	-1	19.4025974025974	-1	0	4.31081081081081
2016_49	1.16971713810316	23.8888888888889	0.483443708609272	7675.94594594595	9.8	8.81818181818182	-1	-1	1269.81818181818	2.73333333333333	-1	0.63019693654267	9537.07317073171	10.125	0.456140350877193	335.733333333333	4.20827389443652	2.33898305084746	473.875	68.8235294117647	7226.08108108108	86.9615384615385	1460.46511627907	0	-1	492	1.39285714285714	11.4583333333333	10.4464285714286	165.174193548387	595.384615384615	13254.6666666667	-1	14723.7551020408	126.888888888889	37.4117647058824	70.9411764705882	34.7692307692308	19249.6981891348	621.84	17.3228346456693	-1	898.153316765437	-1	-1	10.887323943662	-1	193.090909090909	6.21881838074398
2016_50	1.48961937716263	95.352	0.306451612903226	7469.64705882353	9.2	0	-1	-1	1692.11428571429	5.9375	-1	1.17209302325581	11784.7583333333	122.479338842975	0.368421052631579	678.341463414634	7.39030303030303	1.82051282051282	1036.27433628319	324.285714285714	23349.427480916	178.888888888889	2249.98837209302	0	-1	118.105263157895	2.82456140350877	6	26.1843003412969	286.496062992126	1399.46428571429	4170.71929824561	-1	15490.8041958042	177.971014492754	145	-1	18.5769230769231	16700.6199649737	1045.38461538462	18.9255663430421	-1	1453.41245198464	-1	-1	0	-1	616.727272727273	14.4740634005764
2016_51	1.08695652173913	151.507109004739	0.694214876033058	11296.3586206897	21.7142857142857	77.7777777777778	-1	-1	2217.52941176471	0.6875	-1	0.269879518072289	11169.1818181818	219.68115942029	0.166666666666667	1217.1568627451	10.1684210526316	4.43478260869565	1463.7037037037	702.75	47490.3535778713	124.647058823529	4755.98717948718	144	-1	1115.48571428571	-1	3.34615384615385	44.2419928825623	495.121951219512	2648.22807017544	20533.2897196262	-1	9630.30303030303	233.292817679558	400.555555555556	116.265306122449	38.7272727272727	29384.2189141856	902.16393442623	53.6915422885572	-1	2159.34184878913	-1	-1	27.6888888888889	-1	677.6	23.558282208589
2016_52	0.558823529411765	17.16	0	12018.027027027	35.1923076923077	0	-1	-1	3179.90196078431	2.03571428571429	-1	0.391923990498812	10771.2524271845	1235.4275862069	0.196428571428571	1569	11.8992654774397	6.89189189189189	2631.85144124169	703.571428571429	63721.9183264437	69.8181818181818	3243.61016949153	588.564356435644	-1	686.551724137931	8.65591397849462	10.4634146341463	54.6490909090909	584.536956521739	4566.4650455927	16167.5362318841	-1	3281.74358974359	369.751072961373	655.770114942529	69.2857142857143	22.1785714285714	73015.6230366492	472.950819672131	45.5720930232558	-1	1663.29303821415	-1	-1	0	-1	630.086956521739	11.372764786795
2017_01	2.38674033149171	156.597222222222	0	14211.6589861751	74.1818181818182	4.5	-1	19.6190476190476	4266.32530120482	3.1304347826087	-1	0.601307189542484	13363.6473988439	2737.94267515924	0.128205128205128	3102.64864864865	20.6719817767654	7.66956521739131	1655.23320895522	322.947368421053	60564.9220734241	44.4705882352941	5174.50267379679	1238.57608695652	-1	1528.71428571429	-1	7.11111111111111	105.693567251462	736.572916666667	4021.27314814815	16591.8260869565	-1	2248.38095238095	400.798507462687	1151.98275862069	51.2307692307692	46.2413793103448	106482.6875	502.450980392157	72.3793677204659	-1	2829.00935512037	154.326086956522	-1	29.5789473684211	3.14285714285714	2397.26666666667	11.6804733727811
2017_02	2.83333333333333	425.968421052632	0.540540540540541	26653.8165137615	127.418181818182	0	-1	16.2823529411765	3082.18965517241	1.32258064516129	-1	0.825471698113208	12550.495049505	5433.37325905292	0.545454545454545	3573.72631578947	29.0393466963623	16.1834862385321	1501.17055655296	381.217391304348	63150.3349964362	7.36363636363636	6725.01287553648	1054.83935742972	-1	-1	23.2142857142857	27.7894736842105	52.0244798041616	726.297619047619	4105.15587529976	18960.5796178344	-1	2018.90243902439	559.550151975684	1812.25454545455	80.0392156862745	20.2222222222222	125725.467248908	505.92	94.2236842105263	-1	1829.26145552561	160.5703125	-1	12.3620689655172	1.55102040816327	3084.59154929577	5.50658682634731
2017_03	2.07715133531157	281.29889298893	0.419354838709677	26733.0698529412	176	12.7777777777778	-1	18.8372093023256	2003.98529411765	0	-1	0.289017341040462	17126.0776699029	4192.3829787234	0	5020.96875	45.9609261939219	21.5277777777778	2075	149.666666666667	57097.497905613	7.09090909090909	9582.69230769231	1029.1583011583	-1	8549.57419354839	60.7293233082707	37.9381443298969	23.0684292379471	582.012526096033	3638.76419753086	10508.5114822547	-1	1575.2	805.934508816121	753.731958762887	52.5625	0	159563.319926874	367.888888888889	80.91875	-1	1439.13074039363	102.906474820144	-1	25.1351351351351	2.83333333333333	4803.98601398601	3.25588235294118
2017_04	4.09872611464968	297.369797859691	0	24138.4594594595	323.447368421053	10.1	-1	21.0994152046784	1003.44444444444	3.68181818181818	-1	0.352941176470588	11930.29	5759.27737226277	1.89090909090909	7296.46341463415	53.6791086350975	20.3586206896552	1776.71084337349	159.173913043478	58618.482398957	4.33333333333333	11983.6772334294	843.659192825112	-1	13888.0677966102	48.0864197530864	23	12.723311546841	365.579075425791	3386.43653250774	8635.6338028169	-1	881.477272727273	-1	2325.25714285714	31.5918367346939	0	181337.5302391	797.938596491228	87.373046875	-1	1249.3176548526	72.3076923076923	-1	36.9795918367347	1.86206896551724	4660.98231827112	1.388671875
2017_05	3.57324840764331	245.117569352708	0.931818181818182	24514.8813953488	535.380281690141	12.4186046511628	-1	38.4552845528455	1840.28571428571	3.61904761904762	-1	0.337931034482759	9889.9793814433	3702.31213872832	1.30434782608696	5474.67032967033	68.656346749226	33.7718120805369	1857.12860310421	90	43530.8357579284	48.5	13722.1583333333	651.419607843137	-1	11369.0093457944	-1	36.575	11.2458563535912	217.419718309859	2210.48669796557	11532.4857142857	-1	1050.71428571429	843.698360655738	-1	41.6	67.8518518518518	198867.656612529	448.472972972973	116.485714285714	-1	1029.85492655554	72.486301369863	-1	42.9302325581395	2.10909090909091	4564.99744897959	0.553846153846154
2017_06	3.01470588235294	160.72131147541	0.521739130434783	25793.7979094077	378.885245901639	10.093023255814	-1	47.7370892018779	666.865384615385	0	-1	0.314606741573034	12019.7647058824	2410.1875	0.382978723404255	3631.90588235294	64.4761416110826	28.6519607843137	1298.71052631579	65.6	14639.577170123	41.7777777777778	12697.3569553806	425.510204081633	-1	7674.20472440945	78.4920634920635	29.7303370786517	5.42120343839542	164.021978021978	1246.51056910569	6137.24538258575	-1	753.578947368421	863.537671232877	2678.52941176471	38.08	0	212670.007117438	135.178082191781	96.0772532188841	-1	803.719369688385	52.0714285714286	-1	25.6666666666667	0.645833333333333	3487.89344262295	0.862275449101796
2017_07	3.80373831775701	77.2391304347826	0.372413793103448	28950.276	226.56	28.695652173913	-1	43.571072319202	220.058823529412	0	-1	0.651315789473684	11225.6958525346	1087.28780487805	1.42372881355932	1507.34042553191	72.6914947156517	21.6666666666667	995.514492753623	57.2	7638.31660051366	40.7142857142857	11347.5552407932	171.45	-1	2746.81609195402	67.8947368421053	12.2926829268293	3.79310344827586	88.2732919254658	727.788187372709	1139.32	-1	-1	1007.22278056951	962.571428571429	34.5277777777778	0	269636.318335208	205.986666666667	79.7368421052632	-1	795.454804560261	56.1157024793388	-1	27.0612244897959	1.36170212765957	2627.65317919075	0.217054263565891
2017_08	4.6448087431694	36.8121827411168	0.923076923076923	16795.4947368421	141.275862068965	5.64705882352941	-1	45.7777777777778	1241.66666666667	0	-1	2.29166666666667	10247.9565217391	561.3875	1.98275862068966	1023.88059701493	39.2002124269782	17.0958904109589	592.615141955836	115	2056.12041582443	44.6153846153846	7636.85185185185	310.2	-1	1821.41304347826	83.2	27.734375	2.73654390934844	42.9428571428571	315.513833992095	1414.91943127962	-1	617.384615384615	935.973727422003	616.95652173913	8	16.0714285714286	306170.666666667	30.1408450704225	56.4736842105263	-1	716.394355154841	59.0416666666667	-1	0	0.421052631578947	2189.02545454545	0
2017_09	3.63970588235294	32.8362369337979	1.09219858156028	9550.28761061947	30.8823529411765	3.86666666666667	-1	59.0540540540541	0	0	-1	0.894160583941606	9635.43269230769	285.770114942529	1.97014925373134	494.878787878788	19.0427586206897	13.1538461538462	452.723247232472	33.7777777777778	636.952836879433	51.1875	4403.94202898551	0	-1	2018.74137931034	47.1612903225806	23.4782608695652	1.56129032258065	25	224.787172011662	1482.58536585366	-1	0	944.188747731397	188.333333333333	18.4285714285714	0	303750.919389978	285.147058823529	46.242774566474	-1	549.933244325768	83.5963302752294	-1	41.1707317073171	0.552631578947368	1866.48044692737	0.027027027027027
2017_10	2.47252747252747	11.7569721115538	0.483333333333333	9424.81481481481	33.6	42.7058823529412	-1	73.8835443037975	0	0	-1	2.03636363636364	6651.39130434783	135.590551181102	0.280701754385965	437.857142857143	9.37083993660856	9.80434782608696	246.32967032967	22.6666666666667	365.613382899628	38.8461538461538	3034.71875	256.153846153846	-1	633.675675675676	35.7966101694915	26.6944444444444	1.31944444444444	11.7	123.619897959184	219.150684931507	-1	0	711.52380952381	-1	6.30769230769231	57.6	291158.102449889	78.3	42.8048780487805	-1	429.185272598537	48.9076923076923	-1	35.8461538461538	0.8	1093.39622641509	0.0114285714285714
2017_11	3.64912280701754	8.21739130434783	0.439716312056738	2830.38260869565	5.6	0	-1	92.9166666666667	292.296296296296	0	-1	1.62839248434238	6234.53149606299	33.1182795698925	0.375	169.69696969697	5.91509433962264	16.0615384615385	311.556818181818	23.3333333333333	214.761099365751	50.6153846153846	2167.74	279.714285714286	-1	268.301886792453	35	19	0.535714285714286	11.2293577981651	82.0846905537459	0	-1	0	584.774193548387	24.2857142857143	-1	101.045454545455	254869.017793594	166.666666666667	26.6896551724138	-1	377.510685884692	63.5440414507772	-1	112.462686567164	0.631578947368421	582.857142857143	0.0261437908496732
2017_12	3.30275229357798	4.85925925925926	0.808823529411765	7137.83505154639	0	44.4444444444444	-1	97.5353535353535	248.461538461538	0	-1	4.94426229508197	7292.20216606498	18.1818181818182	0.0454545454545455	0	3.24909747292419	6.80373831775701	-1	10.2	152.375822860563	36	1540.81415929204	293.7	-1	95.4193548387097	30.0851063829787	16.7222222222222	1.07142857142857	9.16230366492147	34.076	0	-1	0	502.820433436533	40.2857142857143	-1	78.5454545454545	204402.757327081	74.5645161290323	21.1864406779661	-1	307.536842105263	48.1764705882353	-1	55.0847457627119	0	380.533333333333	0
2017_13	3.93063583815029	8.875	0.598130841121495	2476.38016528926	-1	25.0434782608696	-1	126.01598173516	298.6	0	-1	5.1973898858075	6780.96503496504	-1	0.0677966101694915	138.5	2.16783216783217	7.57009345794392	232.861538461538	0	70.264768683274	17	717.785714285714	199.636363636364	-1	128.266666666667	29.53125	12	0.40506329113924	0.664835164835165	17.8	109.541666666667	-1	0	475.945606694561	44	-1	51.4285714285714	210698.458177278	0	22.0810810810811	-1	278.545163868905	52.5454545454545	-1	131.136	0	275.333333333333	0.00840336134453781
2017_14	1.94003241491086	0	1.94968553459119	1361.31818181818	-1	31.2592592592593	-1	110.633262260128	315.625	0	-1	4.65727699530516	5139.09375	4.17391304347826	0.0571428571428571	70.5217391304348	0.620065789473684	10.9285714285714	128.48	0	2.67663257277734	17.7	1735.11111111111	0	-1	163.333333333333	24.7787610619469	19.52	0.673469387755102	3.04663212435233	17.4364640883978	646.4	-1	0	327.261083743842	17.25	-1	105.217391304348	165179.919324578	0	10.9285714285714	-1	202.30198446937	71.8167938931298	-1	126.585365853659	0.394736842105263	0	0
2017_15	1.41407528641571	-1	4.93589743589744	190.355140186916	0	29.0277777777778	-1	159.511450381679	0	0	-1	3.9907063197026	5201.04347826087	8.94736842105263	0.413793103448276	358.75	0.305483028720627	9.94	80.0653594771242	12.5	0	32.4	418.3125	-1	-1	160	8.39240506329114	5.3953488372093	0.336099585062241	-1	14.8938053097345	558.243902439024	-1	-1	284.867256637168	15.6923076923077	-1	182.692307692308	128367.704485488	41.5	14.8	-1	71.1036192364898	91.1716417910448	-1	90.5901639344262	0.6	316.714285714286	0
2017_16	0.723489932885906	-1	1.34285714285714	1015.97777777778	-1	41.4909090909091	-1	148.356347438753	0	0	-1	4.21151271753681	6299.34013605442	18.6206896551724	0.186046511627907	160.5	0.338461538461538	8.81981981981982	124	19	-1	0	424.129032258065	0	-1	0	3.2258064516129	17.28	0.162037037037037	-1	10.2682926829268	226.190476190476	-1	0	260.666666666667	0	-1	169.105263157895	117074.853164557	54.8181818181818	13.4117647058824	-1	109.803839441536	86.9928571428571	-1	225.964285714286	0.424657534246575	1100.5	0
2017_17	1.01596516690856	-1	-1	0	0	35.8604651162791	-1	134.94964028777	0	0	-1	4.65860597439545	5444.97902097902	0	0	63.5555555555556	0.598591549295775	5.02597402597403	132.850877192982	0	-1	3.41176470588235	278.75	141.666666666667	-1	90.3333333333333	9.32432432432432	12.32	0.391304347826087	-1	6.64406779661017	-1	-1	0	192.865671641791	35	-1	-1	89880.8814814815	0	8	-1	94.47928802589	100.571428571429	-1	231.3	0	296.533333333333	0
2017_18	2.06854838709677	-1	11.4388489208633	0	-1	36.2121212121212	-1	205.18018018018	0	0.916666666666667	-1	7.32166890982503	5623.69655172414	0	0	0	0.4375	4.56716417910448	91	-1	-1	7.85714285714286	0	0	-1	0	-1	9.6	0.0552486187845304	-1	-1	-1	-1	0	145.173913043478	38	-1	166.090909090909	-1	0	16.3125	-1	80.1110204081633	198.497487437186	-1	429.236363636364	0	0	0
2017_19	1.46747967479675	-1	15.1165644171779	0	-1	90	-1	177.161987041037	-1	0	-1	11.3586956521739	7041.92882562278	-1	0.263157894736842	211.2	0.221538461538462	1.90697674418605	128.368421052632	5.5	-1	0	481.584905660377	50.8333333333333	-1	0	-1	17	0.0185758513931889	-1	-1	-1	-1	0	235.052631578947	12	-1	249.394736842105	-1	0	10.8	-1	133.45256232687	204.48	-1	670.326732673267	2	0	0
2017_20	2.36723910171731	-1	21.0123456790123	0	0	37.4516129032258	-1	211.955257270693	0	0.833333333333333	-1	17.5140449438202	6263.96078431373	5.5	0.1875	0	0.13968253968254	8.04123711340206	322.266666666667	0	-1	5	655.217391304348	-1	-1	0	-1	12.1034482758621	0.259259259259259	-1	-1	-1	-1	0	268.522727272727	40.625	-1	292.371428571429	-1	0	15	-1	54.7730673316708	169.115646258503	-1	703.296	0.666666666666667	0	0
2017_21	2.81566265060241	-1	59.2905405405405	0	-1	28.9655172413793	-1	179.644646924829	0	7.04	-1	26.7416918429003	7364.09698996656	-1	0	-1	-1	2.95454545454545	405.575757575758	0	-1	13	0	-1	-1	-1	-1	8.59649122807017	0.216216216216216	-1	-1	0	-1	-1	-1	23.3333333333333	-1	365.178571428571	-1	0	6	-1	-1	224.964028776978	-1	902.709677419355	0.365384615384615	437	0
2017_22	2.0568669527897	-1	44.8974358974359	0	-1	32.3076923076923	-1	177.862232779097	0	2	-1	36.8513853904282	8745.61172161172	-1	0.470588235294118	-1	-1	3.24324324324324	290.875	0	-1	4.53846153846154	162.805555555556	-1	-1	-1	-1	6.66666666666667	0.128342245989305	-1	-1	-1	-1	-1	-1	9.42857142857143	-1	230.833333333333	-1	0	8.8	-1	-1	168.555555555556	-1	510.678733031674	1.39285714285714	0	0
2017_23	3.35960591133005	-1	72.0542635658915	0	-1	43.5428571428571	-1	171.285714285714	0	3.91304347826087	-1	53.0869565217391	9662.42519685039	-1	-1	-1	-1	2.47619047619048	148.078431372549	-1	-1	0	0	-1	-1	-1	-1	14.84	0.158730158730159	-1	-1	-1	-1	-1	-1	0	-1	114.5	-1	0	2.57142857142857	-1	-1	88.659793814433	-1	825.547703180212	4.33333333333333	0	-1
2017_24	3.99776035834267	-1	39.0903225806452	0	-1	19.1333333333333	-1	131.586538461538	0	2.78260869565217	-1	81.5526669654863	7646.79245283019	-1	-1	-1	-1	1.75384615384615	0	0	-1	-1	108.775	-1	-1	-1	-1	7.69090909090909	0	-1	-1	-1	-1	-1	-1	-1	-1	156.923076923077	-1	0	1.83333333333333	-1	-1	95.7674418604651	-1	698.805555555556	4.32558139534884	0	-1
2017_25	6.70009285051068	-1	34.1927710843374	0	-1	50.5882352941176	-1	102.541766109785	0	1.57692307692308	-1	83.3519751442521	7801.38582677165	-1	-1	-1	-1	4.27536231884058	81.7142857142857	-1	-1	-1	0	-1	-1	-1	-1	8	0.0233918128654971	-1	-1	-1	-1	-1	-1	-1	-1	172.857142857143	-1	-1	0	-1	-1	55.3928571428571	-1	505.551724137931	2.11111111111111	0	-1
2017_26	9.00485908649174	-1	6.84	-1	-1	37.7142857142857	-1	91.6762402088773	0	6	-1	65.4257756563246	7001.97580645161	-1	-1	-1	-1	4.37209302325581	0	0	-1	0	0	-1	-1	-1	-1	0	0.0641025641025641	-1	-1	0	-1	-1	-1	-1	-1	55.6363636363636	-1	-1	0	-1	-1	87.030303030303	-1	485.633187772926	2.89130434782609	-1	-1
2017_27	21.0514018691589	-1	107.611650485437	-1	-1	57.8461538461538	-1	62.3019943019943	-1	4.66666666666667	-1	38.5164737310775	7244.58823529412	-1	-1	-1	-1	0	24.5116279069767	0	-1	0	0	-1	-1	-1	-1	11.7647058823529	0.0786516853932584	-1	-1	-1	-1	-1	-1	0	-1	0	-1	-1	5.77777777777778	-1	-1	50.8762886597938	-1	330.473933649289	3.18965517241379	0	-1
2017_28	28.5492772667543	-1	45.2081218274112	0	-1	95.5	-1	38.0829015544041	-1	3.81818181818182	-1	26.1024282560706	7124.83794466403	-1	-1	-1	-1	3.54716981132075	38.4285714285714	-1	-1	0	0	-1	-1	-1	-1	3.51851851851852	0.0196078431372549	-1	-1	-1	-1	-1	-1	0	-1	36.2608695652174	-1	-1	5.42857142857143	-1	-1	73.3333333333333	-1	211.229946524064	5.03703703703704	1111	-1
2017_29	51.2173913043478	-1	33.8297872340426	0	-1	86.3030303030303	-1	11.1111111111111	0	5.19230769230769	-1	14.6440422322775	6472.27016129032	-1	-1	-1	-1	0	0	0	-1	2.2	0	-1	-1	-1	-1	10.1666666666667	0.0875912408759124	-1	-1	-1	-1	-1	-1	-1	-1	33.375	-1	-1	3.75	-1	-1	51.5	-1	103.145161290323	4.74074074074074	0	-1
2017_30	60.2852133255406	-1	21.0810810810811	-1	-1	98.6	-1	-1	-1	4.8	-1	10.6290018832392	7809.265625	-1	-1	-1	-1	1.91304347826087	40.7391304347826	0	-1	0	0	-1	-1	-1	-1	9.73913043478261	0.0863309352517986	-1	-1	-1	-1	-1	-1	0	-1	0	-1	-1	0	-1	-1	33.950495049505	-1	183.652173913043	1.76744186046512	0	-1
2017_31	141.354783599089	-1	27.5459459459459	0	-1	117.393939393939	-1	-1	-1	10.2162162162162	-1	6.31520991052994	7881.55870445344	-1	-1	-1	-1	0	22.7368421052632	0	-1	0	155.407407407407	-1	-1	-1	-1	14.2241379310345	0.0254777070063694	-1	-1	-1	-1	-1	-1	0	-1	0	-1	-1	-1	-1	-1	-1	-1	152.525773195876	2.24	0	-1
2017_32	196.851968503937	-1	26.8571428571429	0	-1	109.475	-1	-1	0	9.5	-1	6.30876216968011	8653.16455696203	-1	-1	-1	-1	0	0	-1	-1	0	0	-1	-1	-1	-1	8.45901639344262	0.0875912408759124	-1	-1	-1	-1	-1	-1	0	-1	0	-1	-1	6	-1	-1	-1	-1	79.6530612244898	1.40740740740741	0	-1
2017_33	186.267815191856	-1	8.84615384615385	0	-1	126.315789473684	-1	-1	0	16.3636363636364	-1	5.35573411249087	9453.97674418605	-1	-1	-1	-1	1.5	28.4242424242424	-1	-1	0	0	-1	-1	-1	-1	10.6530612244898	0.062992125984252	-1	-1	-1	-1	-1	-1	0	-1	17.7647058823529	-1	-1	2.16666666666667	-1	-1	-1	-1	107.818181818182	0	0	-1
2017_34	181.43581976524	-1	24.7619047619048	0	-1	50.936170212766	-1	-1	0	19.875	-1	5.70433436532508	9445.22421524664	-1	-1	-1	-1	0.9	0	-1	-1	-1	0	-1	-1	-1	-1	9.91525423728813	0.0769230769230769	-1	-1	-1	-1	-1	-1	0	-1	30.4615384615385	-1	-1	0	-1	-1	-1	-1	19.6615384615385	0	0	-1
2017_35	145.029230769231	-1	2.01315789473684	0	-1	124.666666666667	-1	-1	0	24	-1	5.17687661777394	9506.79245283019	-1	-1	-1	-1	0	0	1.5	-1	0	0	-1	-1	-1	-1	8.28571428571428	0.032520325203252	-1	-1	0	-1	-1	-1	0	-1	-1	-1	-1	0	-1	-1	-1	-1	114	0.372093023255814	0	-1
2017_36	173.638968481375	-1	22.5	-1	-1	114.68085106383	-1	-1	-1	22	-1	4.31034482758621	10978.5089285714	-1	-1	-1	-1	0	0	0	-1	-1	0	-1	-1	-1	-1	11.9428571428571	0	-1	-1	-1	-1	-1	-1	0	-1	28.6	-1	0	0	-1	-1	-1	-1	27.2771084337349	0.51063829787234	0	-1
2017_37	129.604077253219	-1	7.896	0	0	107.744186046512	-1	-1	0	26.9285714285714	-1	5.51411764705882	9820.05194805195	-1	-1	-1	-1	1	0	2.5	-1	0	0	-1	-1	-1	-1	15.9230769230769	0.0197044334975369	-1	-1	0	-1	-1	-1	-1	-1	0	-1	76.9166666666667	0	-1	-1	-1	-1	13.1744186046512	0	0	-1
2017_38	104.542159180457	-1	4	0	-1	62.8730158730159	-1	-1	0	20.1818181818182	-1	5.342175066313	11202.2592592593	-1	-1	-1	-1	0	0	4.09090909090909	-1	0	0	-1	-1	-1	-1	12.551724137931	0.206008583690987	-1	-1	0	-1	-1	-1	0	-1	0	-1	48.55	4.63636363636364	-1	-1	-1	-1	39.5744680851064	1.45833333333333	0	-1
2017_39	73.6310810810811	-1	0.777777777777778	0	0	16.5333333333333	-1	-1	0	29.6470588235294	-1	5.62980209545984	11670.5433070866	-1	-1	-1	-1	0	0	1.25	-1	0	-1	-1	-1	-1	-1	20.46	0.252918287937743	-1	-1	-1	-1	-1	-1	0	-1	0	-1	0	0	-1	-1	-1	-1	40.4	1.625	0	-1
[truncated: 16 more columns]
